# Supplementary material
Source: publisher figshare collection journal article supplement (https://acs.figshare.com/ndownloader/files/25468252)
Supplement: Supplementary file 1 [file 25468252]

# Cu-catalyzed Dehydrogenative Olefinsulfonation of Alkyl Arenes

Fangfang Li,<sup>†‡</sup> Guang'an Zhang,<sup>†‡</sup> Yingguo Liu,<sup>‡</sup> Bingke Zhu,<sup>†</sup> Yuting Leng,<sup>†\*</sup> and Junliang Wu<sup>†\*</sup>

<sup>†</sup>College of Chemistry, and Institute of Green Catalysis; Zhengzhou University, Zhengzhou 450001, P. R. China

<sup>‡</sup>Division of Molecular Catalysis & Synthesis, Henan Institute of Advanced Technology, Zhengzhou University, Zhengzhou 450001, P. R. China

E-mail: [wujl@zzu.edu.cn](mailto:wujl@zzu.edu.cn); [yutingleng@zzu.edu.cn](mailto:yutingleng@zzu.edu.cn)

## Supporting Information

### Table of Contents

|                                                                                          |     |
|------------------------------------------------------------------------------------------|-----|
| 1. General Considerations.....                                                           | S2  |
| 2. Optimization for the Olefinsulfonation process.....                                   | S2  |
| 3. Procedures for the Preparation of Starting Compounds.....                             | S9  |
| 4. General Procedure for the Olefinsulfonation .....                                     | S11 |
| 5. X-Ray Structure of <b>3ba</b> .....                                                   | S19 |
| 6. Mechanistic studies.....                                                              | S21 |
| 7. Gram-scale Reaction.....                                                              | S24 |
| 8. References.....                                                                       | S26 |
| 9. Images of <sup>1</sup> H, <sup>13</sup> C NMR, <sup>19</sup> F NMR, HRMS Spectra..... | S27 |

## 1. General Considerations

All manipulations were carried out in an oven-dried tube under the Ar atmosphere. Copper salts, bases, oxidants, ligands and solvents were purchased from Energy chemical, Beta, 3A chemical and Aladdin Reagent. NMR spectra were recorded on AVIII-600 (600 MHz for  $^1\text{H}$ ; 565 MHz for  $^{19}\text{F}$ ; 150 MHz for  $^{13}\text{C}$ ). The chemical shifts ( $\delta$ ) are given in parts per million relative to  $\text{CDCl}_3$  (7.26 ppm for  $^1\text{H}$ ) or TMS (0 ppm for  $^1\text{H}$ ) and  $\text{CDCl}_3$  (77.0 ppm for  $^{13}\text{C}$ ). Chemical shifts ( $\delta$ ) are reported in ppm, and coupling constants ( $J$ ) are in Hertz (Hz). The following abbreviations are used to explain the multiplicities: s = singlet, d = doublet, t = triplet, q = quartet, m = multiplet, br = broad. Compounds for HRMS were analyzed on a Waters Q-ToF Micro MS/MS System ESI spectrometer. X-ray diffraction data was collected on an Oxford Diffraction Xcalibur CCD (X-ray single-crystal diffractometer). The substrates **1a-1i**, were purchased from Aladdin, Energy chemical, Beta without further purification. The starting materials **1j-1n** <sup>[1-2]</sup>, **2a-2v** <sup>[3]</sup>, were prepared according to previously reported procedures. All solvents were transferred by syringe to the reaction flask. Flash column chromatography was performed with silica gel (200-300 mesh). **All the reactions were carried out on an aluminum sand bath.**

## 2. Optimization for the Olefinsulfonation process

**Table S1.** Screening of Copper catalysis <sup>[a]</sup>

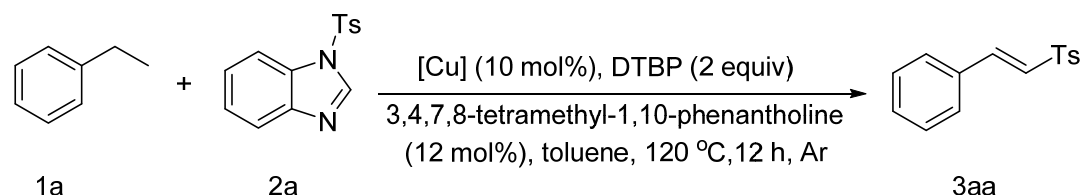

| Entry             | Catalyst                                              | 3aa <sup>[b]</sup> (%) |
|-------------------|-------------------------------------------------------|------------------------|
| 1                 | CuCl                                                  | trace                  |
| 2                 | CuCl <sub>2</sub>                                     | trace                  |
| 3                 | CuI                                                   | trace                  |
| 4                 | Cu(CH <sub>3</sub> CN) <sub>4</sub> PF <sub>6</sub>   | trace                  |
| 5                 | [CuOTf] <sub>2</sub> •toluene                         | 11                     |
| 6 <sup>[c]</sup>  | Cu(OAc) <sub>2</sub>                                  | NR                     |
| 7 <sup>[c]</sup>  | CuBr                                                  | NR                     |
| 8 <sup>[c]</sup>  | Cu(ClO <sub>4</sub> ) <sub>2</sub> •6H <sub>2</sub> O | NR                     |
| 9 <sup>[c]</sup>  | Cu(OTf) <sub>2</sub>                                  | NR                     |
| 10 <sup>[c]</sup> | CuBr <sub>2</sub>                                     | NR                     |

<sup>[a]</sup>Reaction Conditions: **1a** (2 mmol), **2a** (0.2 mmol), Cu catalyst (0.02 mmol), 3,4,7,8-tetramethyl-1,10-phenanthroline (12 mol%), DTBP (2 equiv), toluene (1.0 mL), 120 °C, 12 h, Argon. <sup>[b]</sup>Isolated yield, <sup>[c]</sup>NR=No Reaction. <sup>[d]</sup>DTBP=Di-tert-butyl peroxide.

**Table S2.** Screening of ligands<sup>[a]</sup>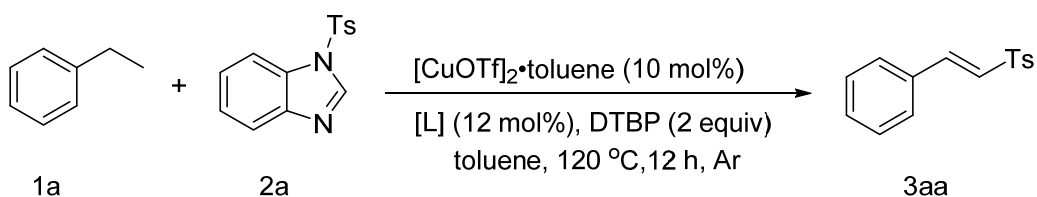

| Entry | [L]                                      | 3aa <sup>[b]</sup> (%) |
|-------|------------------------------------------|------------------------|
| 1     | 1,10-phenanthroline                      | trace                  |
| 2     | 4,7-diphenyl-1,10-phenanthroline         | trace                  |
| 3     | 2,2-dipyridine                           | trace                  |
| 4     | 1,10-phenanthroline-5,6-dione            | trace                  |
| 5     | 2,9-dimethyl-1,10-phenanthroline hydrate | trace                  |

<sup>[a]</sup>Reaction Conditions: 1a (2 mmol), 2a (0.2 mmol), [CuOTf]<sub>2</sub>•toluene (10 mol%), [L] (12 mol%), DTBP (2 equiv), toluene (1.0 mL), 120 °C, 12 h, Argon. <sup>[b]</sup>Isolated yield. <sup>[d]</sup>DTBP=Di-tert-butyl peroxide.

**Table S3.** Screening of Solvents<sup>[a]</sup>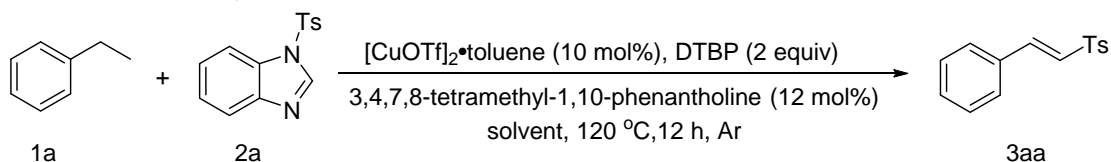

| Entry            | solvent            | 3aa <sup>[b]</sup> (%) |
|------------------|--------------------|------------------------|
| 1                | DMF                | trace                  |
| 2 <sup>[c]</sup> | DMSO               | NR                     |
| 3 <sup>[c]</sup> | THF                | NR                     |
| 4 <sup>[c]</sup> | CH <sub>3</sub> CN | NR                     |
| 5 <sup>[c]</sup> | CH <sub>3</sub> OH | NR                     |

<sup>[a]</sup>Reaction Conditions: 1a (2 mmol), 2a (0.2 mmol), [CuOTf]<sub>2</sub>•toluene (10 mol%), 3,4,7,8-tetramethyl-1,10-phenanthroline (12 mol%), DTBP (2 equiv), solvent (1.0 mL), 120 °C, 12 h, Argon. <sup>[b]</sup>Isolated yield, <sup>[c]</sup>NR=No Reaction. <sup>[d]</sup>DTBP=Di-tert-butyl peroxide.

**Table S4.** Screening of Ligand loading<sup>[a]</sup>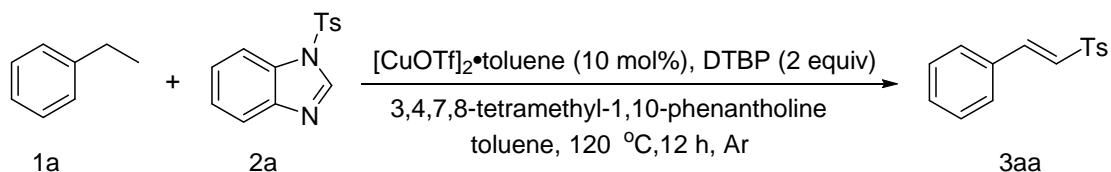

| Entry | L(mmol%) | 3aa <sup>[b]</sup> (%) |
|-------|----------|------------------------|
| 1     | 20       | 6                      |
| 2     | 12       | 7                      |
| 3     | 6        | 12                     |

<sup>[a]</sup>Reaction Conditions: 1a (1 mmol), 2a (0.2 mmol),  $[\text{CuOTf}]_2\cdot\text{toluene}$  (10 mol%), DTBP (2 equiv), [L]: 3,4,7,8-tetramethyl-1,10-phenanthroline, toluene (1.0 mL), 120 °C, 12 h. <sup>[b]</sup>Isolated yield. <sup>[c]</sup>DTBP=Di-tert-butyl peroxide.

**Table S5.** Screening of Additives<sup>[a]</sup>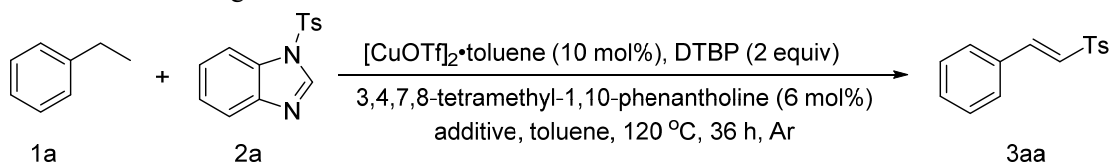

| Entry | additive 1 | additive 2 | additive 3 | 3aa <sup>[b]</sup> (%) |
|-------|------------|------------|------------|------------------------|
| 1     | TBAB       | ----       | ----       | trace                  |
| 2     | ----       | NCS        | ----       | 6                      |
| 3     | ----       | ----       | 3Å         | trace                  |
| 4     | TBAB       | NCS        | ----       | 20                     |
| 5     | TBAB       | NCS        | 3Å         | 34                     |

<sup>[a]</sup>Reaction Conditions: 1a (1.4 mmol), 2a (0.2 mmol),  $[\text{CuOTf}]_2\cdot\text{toluene}$  (10 mol%), DTBP (0.4 mmol), 3,4,7,8-tetramethyl-1,10-phenanthroline (6 mol%), additive 1 (0.5 equiv), additive 2 NCS (1.2 equiv), additive 3 (25 mg), toluene (1.0 mL), 120 °C, 36 h, Argon. <sup>[b]</sup>Isolated yield. <sup>[c]</sup>DTBP=Di-tert-butyl peroxide, TBAB=Tetrabutylammonium bromide, NCS=N-Chlorosuccinimide.

**Table S6.** Optimization of Reaction Time<sup>[a]</sup>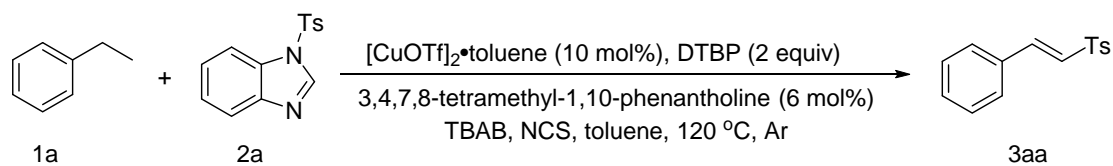

| Entry | time/h | 3aa <sup>[b]</sup> (%) |
|-------|--------|------------------------|
| 1     | 12     | 20                     |
| 2     | 24     | 25                     |
| 3     | 36     | 34                     |

<sup>[a]</sup>Reaction Conditions: 1a (1 mmol), 2a (0.2 mmol), [CuOTf]<sub>2</sub>•toluene (10 mol%), DTBP (0.4 mmol), 3,4,7,8-tetramethyl-1,10-phenanthroline (6 mol%), TBAB (0.5 equiv), NCS (1.2 equiv), toluene (1.0 mL), 120 °C, Argon. <sup>[b]</sup>Isolated yield.

<sup>[c]</sup>DTBP=Di-tert-butyl peroxide, TBAB=Tetrabutylammonium bromide, NCS=N-Chlorosuccinimide.

**Table S7.** Screening of Molecular Sieves <sup>[a]</sup>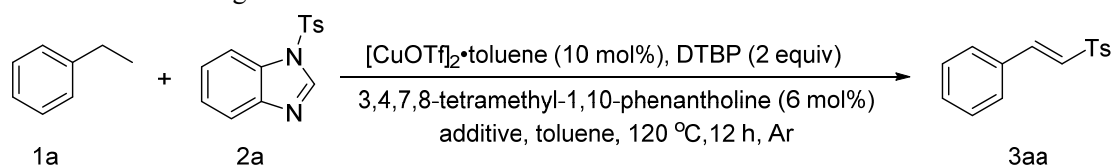

| Entry | additive 3 | 3aa <sup>[b]</sup> (%) |
|-------|------------|------------------------|
| 1     | 3Å         | 26                     |
| 2     | 4Å         | 22                     |
| 3     | 5Å         | 20                     |

<sup>[a]</sup>Reaction Conditions: 1a (1 mmol), 2a (0.2 mmol), [CuOTf]<sub>2</sub>•toluene (10 mol%), DTBP (0.4 mmol), 3,4,7,8-tetramethyl-1,10-phenanthroline (6 mol%), TBAB (0.5 equiv), NCS (1.2 equiv), additive 3 (50 mg), toluene (1.0 mL), 120 °C, Argon, 12 h.

<sup>[b]</sup>Isolated yield. <sup>[c]</sup>DTBP=Di-tert-butyl peroxide, TBAB=Tetrabutylammonium bromide, NCS=N-Chlorosuccinimide.

**Table S8.** Screening of substrate loading<sup>[a]</sup>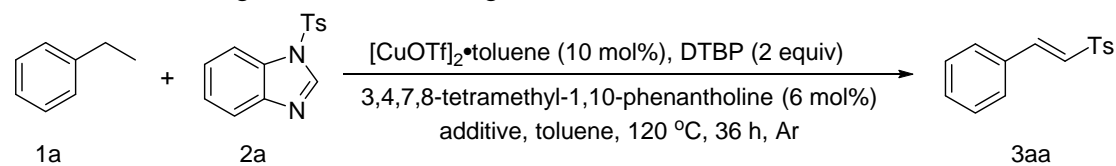

| Entry | 1a/mmol | 3aa <sup>[b]</sup> (%) |
|-------|---------|------------------------|
| 1     | 1       | 29                     |
| 2     | 1.4     | 38                     |
| 3     | 2       | 33                     |

<sup>[a]</sup>Reaction Conditions: 2a (0.2 mmol), [CuOTf]<sub>2</sub>•toluene (10 mol%), DTBP (0.4 mmol), 3,4,7,8-tetramethyl-1,10-phenanthroline (6 mol%), 3Å (25 mg), TBAB (0.5 equiv), NCS (1.2 equiv), toluene (1.0 mL), 120 °C, 36 h, Argon. <sup>[b]</sup>Isolated yield. <sup>[c]</sup>DTBP=Di-tert-butyl peroxide, TBAB=Tetrabutylammonium bromide, NCS=N-Chlorosuccinimide.

**Table S9.** Screening of bromine source<sup>[a]</sup>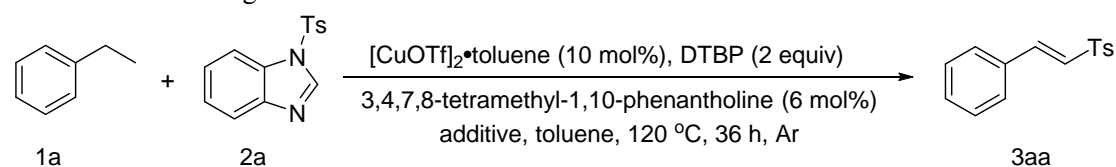

| Entry | additive 1/mmol                    | 3aa <sup>[b]</sup> (%) |
|-------|------------------------------------|------------------------|
| 1     | KBr(0.4)                           | 40                     |
| 2     | LiBr(0.4)                          | 52                     |
| 3     | ZnBr <sub>2</sub> (0.4)            | 33                     |
| 4     | FeBr <sub>3</sub> (0.02)           | 37                     |
| 5     | LiBr(0.4)+FeBr <sub>3</sub> (0.02) | 70                     |

<sup>[a]</sup>Reaction Conditions: 1a(1.4 mmol), 2a (0.2 mmol), [CuOTf]<sub>2</sub>•toluene (10 mol%), DTBP (0.4 mmol), 3,4,7,8-tetramethyl-1,10-phenanthroline (6 mol%), 3Å (25 mg), NCS (1.2 equiv), toluene (1.0 mL), 120 °C, 36 h, Argon. <sup>[b]</sup>Isolated yield.

<sup>[c]</sup>DTBP=Di-tert-butyl peroxide, NCS=N-Chlorosuccinimide.

**Table S10.** Screening of Tosyl Radical Source<sup>[a]</sup>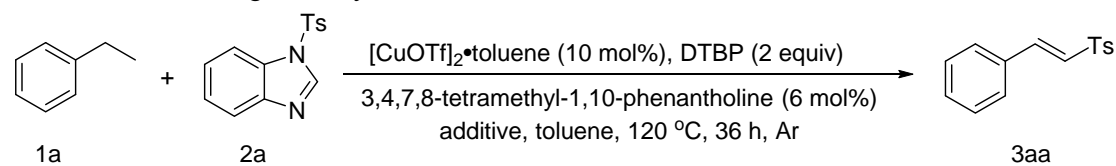

| Entry | 2a              | 3aa <sup>[b]</sup> (%) |
|-------|-----------------|------------------------|
| 1     | 2a <sub>1</sub> | 49                     |
| 2     | 2a <sub>2</sub> | NR                     |
| 3     | 2a <sub>3</sub> | NR                     |
| 4     | 2a <sub>4</sub> | trace                  |

<sup>[a]</sup>Reaction Conditions: 1a (1.4 mmol), 2a (0.2 mmol), [CuOTf]<sub>2</sub>•toluene (10 mol%), DTBP (0.4 mmol), 3,4,7,8-tetramethyl-1,10-phenanthroline (6 mol%), 3 Å (25 mg), NCS (1.2 equiv), LiBr (2 equiv), toluene (1.0 mL), 120 °C, 36 h, Argon.

<sup>[b]</sup>Isolated yield. <sup>[c]</sup>NR=No Reaction. <sup>[d]</sup>DTBP=Di-tert-butyl peroxide, NCS=N-Chlorosuccinimide.

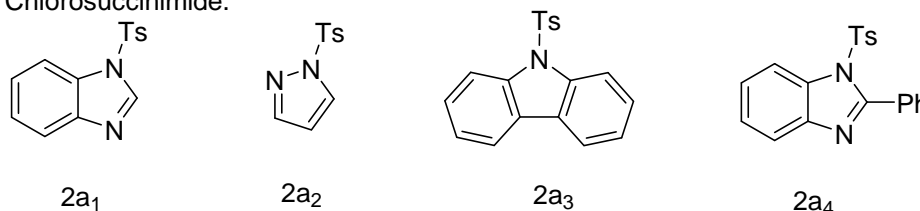**Table S11.** Screening of Iron Co-catalysis<sup>[a]</sup>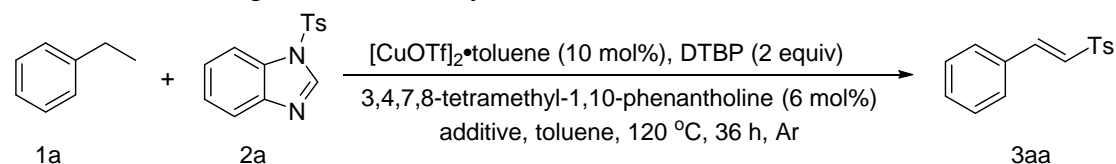

| Entry | additive 4                                            | 3aa <sup>[b]</sup> (%) |
|-------|-------------------------------------------------------|------------------------|
| 1     | FeBr <sub>3</sub>                                     | 70                     |
| 2     | FeCl <sub>2</sub>                                     | 60                     |
| 3     | Fe(OTf) <sub>2</sub>                                  | 57                     |
| 4     | Fe(BF <sub>4</sub> ) <sub>2</sub> •6H <sub>2</sub> O  | 58                     |
| 5     | FePO <sub>4</sub>                                     | 63                     |
| 6     | Fe(OTf) <sub>3</sub>                                  | 61                     |
| 7     | Fe(OAc) <sub>2</sub>                                  | 61                     |
| 8     | Fe(acac) <sub>3</sub>                                 | 39                     |
| 9     | Fe(ClO <sub>4</sub> ) <sub>3</sub> •xH <sub>2</sub> O | 70                     |

<sup>[a]</sup>Reaction Conditions: 1a (1.4 mmol), 2a (0.2 mmol), [CuOTf]<sub>2</sub>•toluene (10 mol%), DTBP (0.4 mmol), 3,4,7,8-tetramethyl-1,10-phenanthroline (6 mol%), 3 Å (25 mg), LiBr (2 equiv), NCS (1.2 equiv), additive 4 (0.02 mmol), toluene (1.0 mL), 120 °C, 36 h, Argon. <sup>[b]</sup>Isolated yield. <sup>[c]</sup>DTBP=Di-tert-butyl peroxide, NCS=N-Chlorosuccinimide.

**Table S12.** Screening of Iron Co-catalysis Loading <sup>[a]</sup>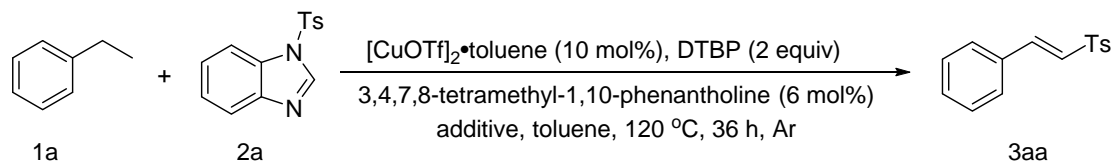

| Entry | [Fe] (mol%)                                               | 3aa <sup>[b]</sup> (%) |
|-------|-----------------------------------------------------------|------------------------|
| 1     | Fe(ClO <sub>4</sub> ) <sub>3</sub> ·xH <sub>2</sub> O(5)  | 57                     |
| 2     | Fe(ClO <sub>4</sub> ) <sub>3</sub> ·xH <sub>2</sub> O(10) | 70                     |
| 3     | Fe(ClO <sub>4</sub> ) <sub>3</sub> ·xH <sub>2</sub> O(20) | 68                     |

<sup>[a]</sup>Reaction Conditions: 1a(1.4 mmol), 2a (0.2 mmol), [CuOTf]<sub>2</sub>·toluene (10 mol%), DTBP (0.4 mmol), 3,4,7,8-tetramethyl-1,10-phenanthroline (6 mol%), 3Å (25 mg), LiBr (2 equiv), NCS (1.2 equiv), toluene (1.0 mL), 120 °C, 36 h, Argon.

<sup>[b]</sup>Isolated yield. <sup>[c]</sup>DTBP=Di-tert-butyl peroxide, NCS=N-Chlorosuccinimide.

**Table S13.** Screening of Base<sup>[a]</sup>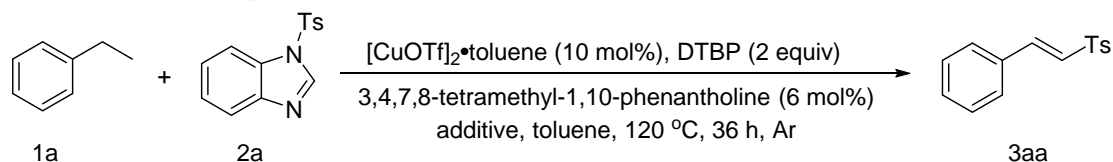

| Entry | base/mmol                             | 3aa <sup>[b]</sup> (%) |
|-------|---------------------------------------|------------------------|
| 1     | Cs <sub>2</sub> CO <sub>3</sub> (0.1) | 67                     |
| 2     | Li <sub>2</sub> CO <sub>3</sub> (0.4) | 75                     |
| 3     | NaOAc(0.4)                            | 37                     |
| 4     | K <sub>2</sub> CO <sub>3</sub> (0.4)  | NR                     |
| 5     | <i>t</i> -BuOLi(0.4)                  | 50                     |
| 6     | DBU(0.4)                              | trace                  |
| 7     | DABCO(0.4)                            | trace                  |

<sup>[a]</sup>Reaction Conditions: 1a(1.4 mmol), 2a (0.2 mmol), [CuOTf]<sub>2</sub>·toluene (10 mol%), DTBP (0.4 mmol), 3,4,7,8-tetramethyl-1,10-phenanthroline (6 mol%), 3Å(25 mg), LiBr (2 equiv), NCS (1.2 equiv), Fe(ClO<sub>4</sub>)<sub>3</sub>·xH<sub>2</sub>O (10 mol%), toluene (1.0 mL), 120 °C, 36 h, Argon. <sup>[b]</sup>Isolated yield. <sup>[c]</sup>NR=No Reaction. <sup>[d]</sup>DTBP=Di-tert-butyl peroxide, NCS=N-Chlorosuccinimide, DABCO=triethylenediamine, DBU=1,8-diazabicyclo[5.4.0]undec-7-ene.



### 3. Procedures for the Preparation of Starting compounds <sup>[1-3]</sup>

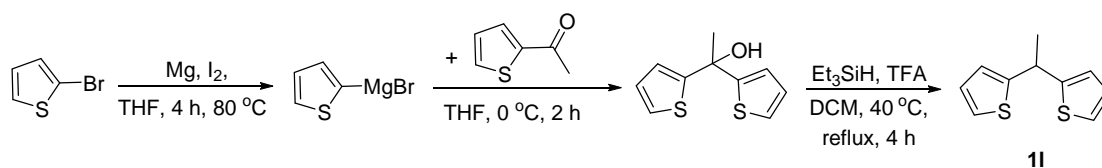

**2,2'-(ethane-1,1-diyl)dithiophene (11):** Under an argon atmosphere, to a 500 mL three-necked round-bottomed flask equipped with a stirrer bar charged with magnesium filings (3.65 g, 150 mmol, 1.5 equiv) and a piece of iodine, dry tetrahydrofuran (THF, 5 mL) was added until the solution became colorless. Then 2-bromothiophene (1.63 g, 100 mmol, 1 equiv) in 100 mL THF was added dropwise slowly. After the dropwise addition finished, the resulting mixture was heated at 80 °C for 4 hours on an aluminum sand bath. After cooling to room temperature, thiophen-2-ylmagnesium bromide in THF solution (0.75 mol / L) was obtained by filtering under argon atmosphere.

Under an argon atmosphere, in a 250 mL three-necked flask, thiophen-2-ylmagnesium bromide (40 mL, 0.75 mol/L in THF, 30 mmol) was added dropwise slowly to a solution of 2-thiophene ethyl ketone (2.16 mL, 20 mmol, 1 equiv) in dry THF at 0 °C. After the dropwise addition finished, the resulting mixture was stirred at 0 °C for 2 h. The reaction was quenched with NH<sub>4</sub>Cl solution and extracted with dichloromethane (30 mL × 3). The organic layer was dried over Na<sub>2</sub>SO<sub>4</sub> and concentrated under reduced pressure. The crude product was purified by flash chromatography on silica gel (petroleum ether/ethyl acetate = 10/1) to afford 1,1-di(thiophen-2-yl)ethan-1-ol as yellow oil (0.9894 g, 24% yield).

Under argon atmosphere, trifluoroacetic acid (3.6 mL, 22.5 mmol, 4.5 equiv) was added to a 1,1-di(thiophen-2-yl)ethan-1-ol (1.05 g, 5 mmol, 1 equiv) solution in dry dichloromethane in a 250 mL three-necked round bottom flask at 0 °C. Then triethylsilane (2.4 mL, 15 mmol, 3 equiv) was added dropwise, the resulting mixture was refluxed at 40 °C for 4 h on an aluminum sand bath. After cooling to room temperature, the reaction was quenched with ammonium carbonate solution and extracted with dichloromethane (10 mL × 3), the organic layer was dried over Na<sub>2</sub>SO<sub>4</sub> and concentrated under reduced pressure. The crude product was purified by flash chromatography on silica gel (petroleum ether) to afford **11** as colorless oil (0.9119 g, 54% yield).

<sup>1</sup>H NMR (600 MHz, CDCl<sub>3</sub>) δ 7.17 (d, *J* = 5.1 Hz, 2H), 6.94 - 6.92 (m, 2H), 6.88 (s, 2H), 4.63 (q, *J* = 7.1 Hz, 1H), 1.78 (d, *J* = 7.1 Hz, 3H); <sup>13</sup>C NMR (150 MHz, CDCl<sub>3</sub>) δ 149.0 (overlap), 125.5 (overlap), 122.7 (overlap), 122.6 (overlap), 35.1, 23.6. HRMS (ESI-TOF) *m/z*: [M+H]<sup>+</sup> Calcd for C<sub>10</sub>H<sub>11</sub>S<sub>2</sub> 195.0302; Found 195.0288.

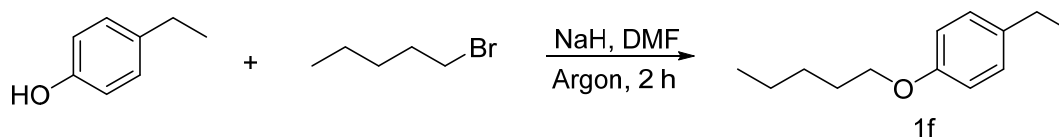

**1-ethyl-4-(pentyloxy)benzene (1f):** Under an argon atmosphere, a 250 mL three-necked round-bottomed flask equipped with a stirrer bar was first charged with 4-ethylphenol (1.22 g, 0.01 mol) in 10 mL of DMF and sodium hydride (0.253 g, 0.011 mol, 60% in mineral oil, previously washed with hexane) at 0 °C, followed by the addition of 1-bromopentane (3.7 mL, 0.03 mol). The solution was stirred at room temperature for 2 h. The resulting mixture was quenched with water and extracted with EtOAc. The organic layer was dried over Na<sub>2</sub>SO<sub>4</sub> and

concentrated under reduced pressure. The crude product was purified by flash chromatography on silica gel (petroleum ether/ethyl acetate = 30/1) to afford **1f** as colorless oil (1.345 g, 70% yield).

$^1\text{H}$  NMR (600 MHz,  $\text{CDCl}_3$ )  $\delta$  7.11 (d,  $J$  = 8.2 Hz, 2H), 6.83 (d,  $J$  = 8.3 Hz, 2H), 3.93 (t,  $J$  = 6.6 Hz, 2H), 2.60 (q,  $J$  = 7.6 Hz, 2H), 1.80 - 1.76 (m, 2H), 1.47 - 1.37 (m, 4H), 1.22 (t,  $J$  = 7.6 Hz, 3H), 0.93 (t,  $J$  = 7.2 Hz, 3H);  $^{13}\text{C}$  NMR (150 MHz,  $\text{CDCl}_3$ )  $\delta$  157.2, 136.2, 128.7, 114.4, 68.0, 29.1, 28.3, 28.0, 22.5, 15.9, 14.0. HRMS (ESI-TOF)  $m/z$ :  $[\text{M}+\text{H}]^+$  Calcd for  $\text{C}_{13}\text{H}_{21}\text{O}$  193.1592; Found 193.1585.

**N-sulfonyl benzo[d]imidazole (2a-2u)** were synthesized according to a previously reported method.

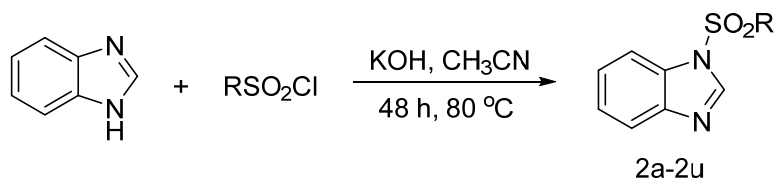

In a 25 mL Schlenk tube equipped with a stirrer bar was charged with benzimidazole (5 mmol, 1 equiv), potassium hydroxide (6 mmol, 1.2 equiv), and sulfonyl chloride (5 mmol, 1 equiv), followed by the addition of acetonitrile (10 mL). The solution was stirred at 80 °C for 48 h on an aluminum sand bath. After cooling to room temperature, the reaction was quenched with water (20 mL) and extracted with ethyl acetate (20 mL  $\times$  3), the organic layer was dried over  $\text{Na}_2\text{SO}_4$  and concentrated under reduced pressure. The crude product was purified by flash chromatography on silica gel to afford the target product.

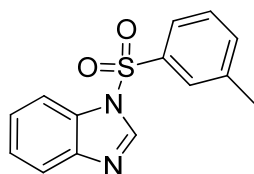

**1-(4-methylphenyl)sulfonyl-1H-benzo[d]imidazole (2l):** White solid (775.4 mg, 57% yield, petroleum ether/ethyl acetate = 5/1);  $^1\text{H}$  NMR (600 MHz,  $\text{CDCl}_3$ )  $\delta$  8.39 (s, 1H), 7.87 (d,  $J$  = 8.0 Hz, 1H), 7.81 - 7.77 (m, 3H), 7.42 - 7.35 (m, 4H), 2.40 (s, 3H);  $^{13}\text{C}$  NMR (150 MHz,  $\text{CDCl}_3$ )  $\delta$  144.0, 141.3, 140.3, 137.5, 135.7, 130.8, 129.5, 127.4, 125.6, 124.8, 124.4, 121.1, 112.5, 21.4; HRMS (ESI-TOF)  $m/z$ :  $[\text{M}+\text{H}]^+$  Calcd for  $\text{C}_{14}\text{H}_{13}\text{N}_2\text{O}_2\text{S}$  273.0698; Found 273.0695.

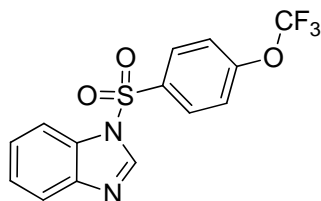

**1-((4-(trifluoromethoxy)phenyl)sulfonyl)-1H-benzo[d]imidazole (2h):** White solid (208.6 mg, 12% yield, petroleum ether/ethyl acetate = 5/1);  $^1\text{H}$  NMR (600 MHz,  $\text{CDCl}_3$ )  $\delta$  8.37 (s, 1H), 8.06 (d,  $J$  = 8.8 Hz, 2H), 7.87 (d,  $J$  = 8.0 Hz, 1H), 7.80 (d,  $J$  = 7.8 Hz, 1H), 7.44 - 7.38 (m, 2H), 7.34 (d,  $J$  = 8.5 Hz, 2H);  $^{13}\text{C}$  NMR (150 MHz,  $\text{CDCl}_3$ )  $\delta$  152.8, 144.1, 141.0, 135.6, 130.7, 129.5, 125.9, 125.2, 121.4, 121.3, 120.0 (q,  $J$  = 255 Hz), 112.4; HRMS (ESI-TOF)  $m/z$ :  $[\text{M}+\text{H}]^+$  Calcd for  $\text{C}_{14}\text{H}_{10}\text{F}_3\text{N}_2\text{O}_3\text{S}$  343.0364; Found 343.0362.

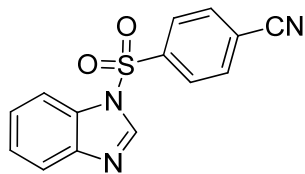

**4-((1H-benzo[d]imidazol-1-yl)sulfonyl)benzonitrile (2j):** White solid (1.1 g, 78% yield, petroleum ether/ethyl acetate = 5/1);  $^1\text{H}$  NMR (600 MHz,  $\text{CDCl}_3$ )  $\delta$  8.36 (s, 1H), 8.11 (d,  $J$  = 8.3 Hz, 2H), 7.79 - 7.85 (m, 4H), 7.45 - 7.40 (m, 2H);  $^{13}\text{C}$  NMR (150 MHz,  $\text{CDCl}_3$ )  $\delta$  144.1, 141.5, 140.9, 133.5, 130.5, 127.8, 126.2, 125.5, 121.5, 118.6, 116.5, 112.3; HRMS (ESI-TOF)  $m/z$ :  $[\text{M}+\text{H}]^+$  Calcd for  $\text{C}_{14}\text{H}_{10}\text{N}_3\text{O}_2\text{S}$  284.0494; Found 284.0490.

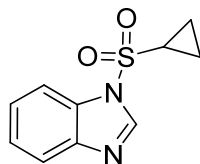

**1-(cyclopropylsulfonyl)-1H-benzo[d]imidazole (2t):** White solid (621.7 mg, 56% yield, petroleum ether/ethyl acetate = 3/1);  $^1\text{H}$  NMR (600 MHz,  $\text{CDCl}_3$ )  $\delta$  8.23 (s, 1H), 7.86 (t,  $J$  = 7.0 Hz, 2H), 7.46 - 7.41 (m, 2H), 2.75 - 2.71 (m, 1H), 1.51 - 1.48 (m, 2H), 1.17-1.14 (m, 2H);  $^{13}\text{C}$  NMR (150 MHz,  $\text{CDCl}_3$ )  $\delta$  144.0, 141.3, 131.3, 125.6, 124.8, 121.2, 112.5, 32.3, 6.8; HRMS (ESI-TOF)  $m/z$ :  $[\text{M}+\text{H}]^+$  Calcd for  $\text{C}_{10}\text{H}_{11}\text{N}_2\text{O}_2\text{S}$  223.0541; Found 223.0538.

## 4. General Procedure for the Olefinsulfonation and Characterization

### Data of Products

In a 10 mL oven-dried Schlenk tube equipped with a stirrer bar was charged with alkyl arenes compounds (1.4 mmol) and N-sulfonyl-benzo[d]imidazole (0.2 mmol), Copper(I) triflate toluene complex (10.34 mg, 10 mol%), 3,4,7,8-Tetramethyl-1,10-phenanthroline (2.8 mg, 6 mol%), N-Chlorosuccinimide (31.9 mg, 1.2 equiv),  $\text{Fe}(\text{ClO}_4)_3 \cdot x\text{H}_2\text{O}$  (7.08 mg, 10 mol%),  $\text{Li}_2\text{CO}_3$  (29.6 mg, 2 equiv), Di-tert-butyl peroxide (74  $\mu\text{L}$ , 2 equiv),  $3\text{\AA}$  (25 mg), and LiBr (34.8 mg, 2 equiv), followed by the addition of anhydrous toluene (1.0 mL). The resulting solution was stirred at 120  $^\circ\text{C}$  for 36 h on an aluminum sand bath under an argon atmosphere. After the resulting mixture was detected to be complete by TLC, the reaction was cooled to room temperature, quenched with water (30 mL) and extracted with dichloromethane (30 mL  $\times$  3), the organic layer was dried over  $\text{Na}_2\text{SO}_4$  and concentrated under reduced pressure. The crude product was purified by flash chromatography on silica gel to afford the desired product.

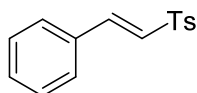

3aa

**(E)-1-methyl-4-(styrylsulfonyl)benzene (3aa)<sup>[4]</sup>:** White solid (38.5 mg, 75% yield, petroleum ether/ethyl acetate = 10/1);  $^1\text{H}$  NMR (600 MHz,  $\text{CDCl}_3$ )  $\delta$  7.83 (d,  $J$  = 8.3 Hz, 2H), 7.66 (d,  $J$  = 15.4 Hz, 1H), 7.47 - 7.46 (m, 2H), 7.40 - 7.37 (m, 3H), 7.34 (d,  $J$  = 8.2 Hz, 2H), 6.86 (d,  $J$  = 15.4 Hz, 1H), 2.42 (s, 3H).  $^{13}\text{C}$  NMR (150 MHz,  $\text{CDCl}_3$ )  $\delta$  144.4, 141.9, 137.8, 132.5, 131.1, 129.9, 129.0, 128.5, 127.7, 127.6, 21.6.

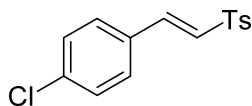

3ba

**(E)-1-chloro-4-(2-tosylvinyl)benzene (3ba)** <sup>[4]</sup>: White solid (37.4 mg, 64% yield, petroleum ether/ ethyl acetate = 10/1); <sup>1</sup>H NMR (600 MHz, CDCl<sub>3</sub>) δ 7.82 (d, *J* = 7.9 Hz, 2H), 7.60 (d, *J* = 15.4 Hz, 1H), 7.41 (d, *J* = 8.2 Hz, 2H), 7.37 - 7.34 (m, 4H), 6.84 (d, *J* = 15.4 Hz, 1H), 2.44 (s, 3H). <sup>13</sup>C NMR (150 MHz, CDCl<sub>3</sub>) δ 144.6, 140.4, 137.5, 137.2, 131.0, 130.0, 129.7, 129.4, 128.3, 127.8, 21.6.

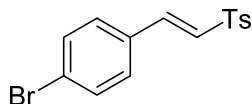

3ca

**(E)-1-bromo-4-(2-tosylvinyl)benzene (3ca)** <sup>[5]</sup>: White solid (39.4 mg, 60% yield, petroleum ether/ ethyl acetate = 10/1); <sup>1</sup>H NMR (600 MHz, CDCl<sub>3</sub>) δ 7.82 (d, *J* = 7.8 Hz, 2H), 7.59 (d, *J* = 15.4 Hz, 1H), 7.52 (d, *J* = 8.0 Hz, 2H), 7.35 - 7.32 (m, 4H), 6.84 (d, *J* = 15.4 Hz, 1H), 2.44 (s, 3H). <sup>13</sup>C NMR (150 MHz, CDCl<sub>3</sub>) δ 144.6, 140.5, 137.5, 132.4, 131.4, 130.0, 129.9, 128.4, 127.8, 125.5, 21.6.

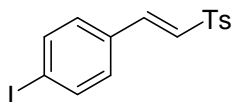

3da

**(E)-1-iodo-4-(2-tosylvinyl)benzene (3da)** <sup>[6]</sup>: White solid (41.8 mg, 54% yield, petroleum ether/ethyl acetate = 10/1); <sup>1</sup>H NMR (600 MHz, CDCl<sub>3</sub>) δ 7.82 (d, *J* = 8.0 Hz, 2H), 7.73 (d, *J* = 8.0 Hz, 2H), 7.57 (d, *J* = 15.4 Hz, 1H), 7.35 (d, *J* = 8.2 Hz, 2H), 7.19 (d, *J* = 8.0 Hz, 2H), 6.85 (d, *J* = 15.4 Hz, 1H), 2.44 (s, 3H). <sup>13</sup>C NMR (150 MHz, CDCl<sub>3</sub>) δ 144.6, 140.7, 138.3, 137.5, 131.9, 130.0, 129.9, 128.4, 127.8, 97.6, 21.6.

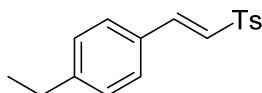

3ea

**(E)-1-ethyl-4-(2-tosylvinyl)benzene (3ea)** <sup>[7]</sup>: White solid (39.3 mg, 69% yield, petroleum ether/ethyl acetate = 10/1); <sup>1</sup>H NMR (600 MHz, CDCl<sub>3</sub>) δ 7.83 (d, *J* = 8.3 Hz, 2H), 7.64 (d, *J* = 15.4 Hz, 1H), 7.40 (d, *J* = 8.2 Hz, 2H), 7.33 (d, *J* = 8.1 Hz, 2H), 7.21 (d, *J* = 8.1 Hz, 2H), 6.81 (d, *J* = 15.4 Hz, 1H), 2.66 (q, *J* = 7.6 Hz, 2H), 2.42 (s, 3H), 1.22 (t, *J* = 7.6 Hz, 3H). <sup>13</sup>C NMR (150 MHz, CDCl<sub>3</sub>) δ 148.1, 144.3, 142.1, 138.0, 130.0 (overlap), 128.7, 128.7, 127.7, 126.5, 28.9, 21.7, 15.3.

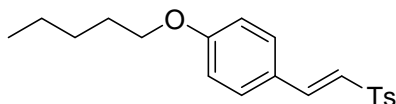

3fa

**(E)-1-methyl-4-((4-(pentyloxy)styryl)sulfonyl)benzene (3fa)** <sup>[8]</sup>: Colourless oil (38.5 mg, 56% yield, petroleum ether/ethyl acetate = 10/1); <sup>1</sup>H NMR (600 MHz, CDCl<sub>3</sub>) δ 7.82 (d, *J* = 8.1 Hz, 2H), 7.59 (d, *J* = 15.4 Hz, 1H), 7.41 (d, *J* = 8.6 Hz, 2H), 7.33 (d, *J* = 8.1

Hz, 2H), 6.88 (d,  $J$  = 8.6 Hz, 2H), 6.68 (d,  $J$  = 15.3 Hz, 1H), 3.97 (t,  $J$  = 6.5 Hz, 2H), 2.42 (s, 3H), 1.81-1.75 (m, 2H), 1.45-1.36 (m, 4H), 0.93 (t,  $J$  = 6.5 Hz, 3H).  $^{13}\text{C}$  NMR (150 MHz,  $\text{CDCl}_3$ )  $\delta$  161.6, 144.1, 141.8, 138.3, 130.3, 129.9, 127.6, 124.8, 124.6, 115.0, 68.2, 28.8, 28.1, 22.4, 21.6, 14.0.

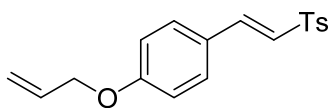

3ga

**(E)-1-methyl-4-((4-(vinylloxy)styryl)sulfonyl)benzene (3ga)**: White solid (13.3 mg, 21% yield, petroleum ether/ethyl acetate = 10/1);  $^1\text{H}$  NMR (600 MHz,  $\text{CDCl}_3$ )  $\delta$  7.82 - 7.81 (m, 2H), 7.59 (d,  $J$  = 15.3 Hz, 1H), 7.42 - 7.40 (m, 2H), 7.33 (d,  $J$  = 7.7 Hz, 2H), 6.91 - 6.90 (m, 2H), 6.70 - 6.68 (m, 1H), 6.06 - 5.99 (m, 1H), 5.40 (d,  $J$  = 17.3 Hz, 1H), 5.29 (d,  $J$  = 10.5 Hz, 1H), 4.57 - 4.56 (m, 2H), 2.43 (s, 3H).  $^{13}\text{C}$  NMR (150 MHz,  $\text{CDCl}_3$ )  $\delta$  161.0, 144.1, 141.7, 138.2, 132.6, 130.3, 129.9, 127.6, 125.2, 124.9, 118.1, 115.2, 68.9, 21.6. HRMS (ESI-TOF)  $m/z$ :  $[\text{M}+\text{H}]^+$  Calcd for  $\text{C}_{18}\text{H}_{19}\text{O}_3\text{S}$  315.1055; Found 315.1052.

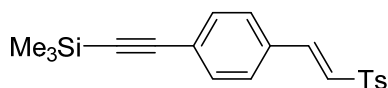

3ha

**(E)-trimethyl((4-(2-tosylvinyl)phenyl)ethynyl)silane (3ha)**: White solid (14.3 mg, 20% yield, petroleum ether/ethyl acetate = 10/1);  $^1\text{H}$  NMR (600 MHz,  $\text{CDCl}_3$ )  $\delta$  7.83 (d,  $J$  = 8.2 Hz, 2H), 7.61 (d,  $J$  = 15.4 Hz, 1H), 7.46 (d,  $J$  = 8.2 Hz, 2H), 7.40 (d,  $J$  = 8.2 Hz, 2H), 7.35 (d,  $J$  = 8.1 Hz, 2H), 6.84 (d,  $J$  = 15.4 Hz, 1H), 2.44 (s, 3H), 0.25 (s, 9H).  $^{13}\text{C}$  NMR (150 MHz,  $\text{CDCl}_3$ )  $\delta$  144.7, 141.0, 137.8, 132.7, 132.5, 130.2, 128.5, 128.4, 127.9, 126.0, 104.3, 97.6, 21.8. HRMS (ESI-TOF)  $m/z$ :  $[\text{M}+\text{H}]^+$  Calcd for  $\text{C}_{20}\text{H}_{23}\text{O}_2\text{SSi}$  355.1188; Found 355.1184.

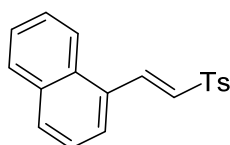

3ia

**(E)-1-(2-tosylvinyl)naphthalene (3ia)**<sup>[9]</sup>: White solid (41.8 mg, 68% yield, petroleum ether/ethyl acetate = 10/1);  $^1\text{H}$  NMR (600 MHz,  $\text{CDCl}_3$ )  $\delta$  8.50 (d,  $J$  = 15.1 Hz, 1H), 8.17 (d,  $J$  = 8.5 Hz, 1H), 7.91 - 7.87 (m, 4H), 7.66 (d,  $J$  = 7.2 Hz, 1H), 7.62-7.60 (m, 1H), 7.56 - 7.54 (m, 1H), 7.45 (t,  $J$  = 7.7 Hz, 1H), 7.37 (d,  $J$  = 8.0 Hz, 2H), 6.96 (d,  $J$  = 15.2 Hz, 1H), 2.44 (s, 3H).  $^{13}\text{C}$  NMR (150 MHz,  $\text{CDCl}_3$ )  $\delta$  144.5, 139.0, 137.6, 133.7, 131.4, 131.3, 130.0, 129.9, 129.6, 128.9, 127.8, 127.3, 126.5, 125.7, 125.3, 123.1, 21.7.

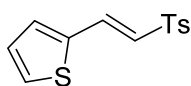

3ja

**(E)-2-(2-tosylvinyl)thiophene (3ja)**<sup>[5]</sup>: White solid (19.8 mg, 38% yield, petroleum ether/ethyl acetate = 10/1);  $^1\text{H}$  NMR (600 MHz,  $\text{CDCl}_3$ )  $\delta$  7.81 (d,  $J$  = 8.2 Hz, 2H), 7.76 (d,  $J$  = 15.1 Hz, 1H), 7.43 (d,  $J$  = 5.0 Hz, 1H), 7.34 (d,  $J$  = 8.1 Hz, 2H), 7.30 (d,  $J$  = 3.5 Hz, 1H), 7.07 - 7.06 (m, 1H),

6.63 (d,  $J$  = 15.1 Hz, 1H), 2.44 (s, 3H).  $^{13}\text{C}$  NMR (150 MHz,  $\text{CDCl}_3$ )  $\delta$  144.4, 137.9, 137.1, 134.6, 132.3, 130.0, 129.8, 128.3, 127.7, 125.9, 21.6.

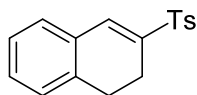

3ka

**3-tosyl-1,2-dihydronaphthalene (3ka)** <sup>[10]</sup>: White solid (34.1 mg, 60% yield, petroleum ether/ethyl acetate = 10/1);  $^1\text{H}$  NMR (600 MHz,  $\text{CDCl}_3$ )  $\delta$  7.80 (d,  $J$  = 8.0 Hz, 2H), 7.56 (s, 1H), 7.33 (d,  $J$  = 7.9 Hz, 2H), 7.26 - 7.22 (m, 3H), 7.12 (d,  $J$  = 7.1 Hz, 1H), 2.86 (t,  $J$  = 8.2 Hz, 2H), 2.49 (t,  $J$  = 8.2 Hz, 2H), 2.42 (s, 3H).  $^{13}\text{C}$  NMR (150 MHz,  $\text{CDCl}_3$ )  $\delta$  144.3, 138.5, 136.6, 135.5, 134.7, 131.0, 130.4, 129.9, 129.0, 128.0, 127.8, 127.1, 27.57, 21.7, 21.6.

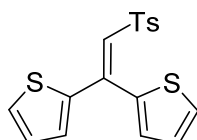

3la

**2,2'-(2-tosylethene-1,1-diyl)dithiophene (3la)**: White solid (34.1 mg, 50% yield, petroleum ether/ethyl acetate = 7/1);  $^1\text{H}$  NMR (600 MHz,  $\text{CDCl}_3$ )  $\delta$  7.51 (d,  $J$  = 7.6 Hz, 2H), 7.44 (d,  $J$  = 5.0 Hz, 1H), 7.40 (d,  $J$  = 5.0 Hz, 1H), 7.32 (d,  $J$  = 3.5 Hz, 1H), 7.17 (d,  $J$  = 8.0 Hz, 2H), 7.06 - 7.03 (m, 2H), 7.01 (s, 1H), 6.99 - 6.98 (m, 1H), 2.38 (s, 3H).  $^{13}\text{C}$  NMR (150 MHz,  $\text{CDCl}_3$ )  $\delta$  144.0, 134.3, 132.2, 130.8, 129.7, 129.0, 128.2, 128.1, 127.8, 126.8, 21.7. HRMS (ESI-TOF)  $m/z$ :  $[\text{M}+\text{H}]^+$  Calcd for  $\text{C}_{17}\text{H}_{15}\text{O}_2\text{S}_3$  347.0234; Found 347.0229.

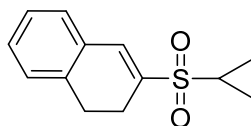

3kt

**3-(cyclopropylsulfonyl)-1,2-dihydronaphthalene (3kt)** <sup>[11]</sup>: White solid (33.9 mg, 60% yield, petroleum ether/ethyl acetate = 7/1);  $^1\text{H}$  NMR (600 MHz,  $\text{CDCl}_3$ )  $\delta$  7.4 (s, 1H), 7.31 - 7.29 (m, 1H), 7.25 (d,  $J$  = 4.1 Hz, 2H), 7.19 (d,  $J$  = 7.4 Hz, 1H), 3.02 - 2.99 (m, 2H), 2.76 - 2.74 (m, 2H), 2.43 - 2.39 (m, 1H), 1.30 - 1.29 (m, 2H), 1.06 - 1.03 (m, 2H).  $^{13}\text{C}$  NMR (150 MHz,  $\text{CDCl}_3$ )  $\delta$  137.8, 135.7, 135.1, 131.0, 130.4, 129.0, 127.8, 127.2, 30.0, 29.3, 27.7, 22.3, 5.1.

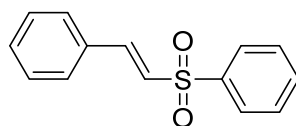

3ab

**(E)-(2-(phenylsulfonyl)vinyl)benzene (3ab)** <sup>[12]</sup>: White solid (36.1 mg, 74% yield, petroleum ether acetate / ethyl = 10/1);  $^1\text{H}$  NMR (600 MHz,  $\text{CDCl}_3$ )  $\delta$  7.96 (d,  $J$  = 8.1 Hz, 2H), 7.69 (d,  $J$  = 15.4 Hz, 1H), 7.62 (t,  $J$  = 7.2 Hz, 1H), 7.55 (t,  $J$  = 7.7 Hz, 2H), 7.49 (d,  $J$  = 7.6 Hz, 2H), 7.42 - 7.38 (m, 3H), 6.87 (d,  $J$  = 15.4 Hz, 1H).  $^{13}\text{C}$  NMR (150 MHz,  $\text{CDCl}_3$ )  $\delta$  142.5, 140.8, 133.4, 132.4, 131.2, 129.4, 129.1, 128.6, 127.7, 127.3.

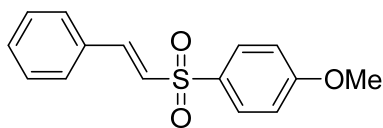

3ac

**(E)-1-methoxy-4-(styrylsulfonyl)benzene (3ac)** <sup>[12]</sup>: White solid (31.1 mg, 57% yield, petroleum ether/ethyl acetate = 7/1); <sup>1</sup>H NMR (600 MHz, CDCl<sub>3</sub>) δ 7.87 (d, *J* = 8.9 Hz, 2H), 7.63 (d, *J* = 15.4 Hz, 1H), 7.47-7.46 (m, 2H), 7.39 - 7.38 (m, 3H), 7.01 (d, *J* = 8.9 Hz, 2H), 6.85 (d, *J* = 15.4 Hz, 1H), 3.87 (s, 3H). <sup>13</sup>C NMR (150 MHz, CDCl<sub>3</sub>) δ 163.6, 141.4, 132.6, 132.3, 131.0, 129.9, 129.1, 128.5, 128.0, 114.6, 55.7.

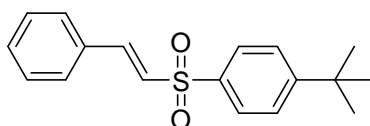

3ad

**(E)-1-(tert-butyl)-4-(styrylsulfonyl)benzene (3ad)** <sup>[12]</sup>: White solid (30.5 mg, 51% yield, petroleum ether/ethyl acetate = 10/1); <sup>1</sup>H NMR (600 MHz, CDCl<sub>3</sub>) δ 7.87 (d, *J* = 8.6 Hz, 2H), 7.67 (d, *J* = 15.4 Hz, 1H), 7.56 - 7.55 (m, 2H), 7.48 - 7.47 (m, 2H), 7.40 - 7.26 (m, 3H), 6.87 (d, *J* = 15.4 Hz, 1H), 1.34 (s, 9H). <sup>13</sup>C NMR (150 MHz, CDCl<sub>3</sub>) δ 157.4, 142.0, 137.7, 132.5, 131.1, 129.1, 128.5, 127.7, 127.6, 126.4, 35.2, 31.1.

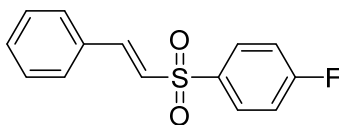

3ae

**(E)-1-fluoro-4-(styrylsulfonyl)benzene (3ae)** <sup>[4]</sup>: White solid (27.8 mg, 53% yield, petroleum ether/ethyl acetate = 10/1); <sup>1</sup>H NMR (600 MHz, CDCl<sub>3</sub>) δ 7.98 - 7.95 (m, 2H), 7.69 (d, *J* = 15.4 Hz, 1H), 7.49 - 7.48 (m, 2H), 7.43 - 7.40 (m, 3H), 7.23 (t, *J* = 8.5 Hz, 2H), 6.84 (d, *J* = 15.4 Hz, 1H). <sup>13</sup>C NMR (150 MHz, CDCl<sub>3</sub>) δ 165.6 (d, *J* = 256.1 Hz), 142.7, 136.8 (d, *J* = 3.0 Hz), 132.3, 131.4, 130.5 (d, *J* = 9.5 Hz), 129.1, 128.6, 127.1, 116.7 (d, *J* = 22.8 Hz); <sup>19</sup>F NMR (565 MHz, CDCl<sub>3</sub>) δ -104.0.

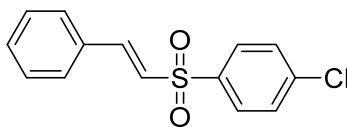

3af

**(E)-1-chloro-4-(styrylsulfonyl)benzene (3af)** <sup>[12]</sup>: White solid (29.4 mg, 53% yield, petroleum ether/ethyl acetate = 10/1); <sup>1</sup>H NMR (600 MHz, CDCl<sub>3</sub>) δ 7.89 (d, *J* = 8.5 Hz, 2H), 7.69 (d, *J* = 15.4 Hz, 1H), 7.52- 7.48 (m, 4H), 7.43- 7.38 (m, 3H), 6.84 (d, *J* = 15.4 Hz, 1H). <sup>13</sup>C NMR (150 MHz, CDCl<sub>3</sub>) δ 142.0, 139.1, 138.3, 131.2, 130.4, 128.7, 128.1, 128.1, 127.6, 125.9.

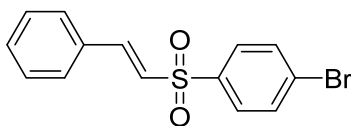

3ag

**(E)-1-bromo-4-(styrylsulfonyl)benzene (3ag)** <sup>[13]</sup>: White solid (29.0 mg, 45% yield, petroleum ether/ethyl acetate = 10/1); <sup>1</sup>H NMR (600 MHz, CDCl<sub>3</sub>) δ 7.81 (d, *J* = 8.6 Hz, 2H), 7.70 - 7.67 (m, 3H), 7.49 (d, *J* = 7.0 Hz, 2H), 7.41 - 7.39 (m, 3H), 6.84 (d, *J* = 15.4 Hz, 1H). <sup>13</sup>C NMR (150 MHz, CDCl<sub>3</sub>) δ 143.1, 139.8, 132.7, 132.2, 131.4, 129.2, 129.2, 128.7 (overlap), 126.8.

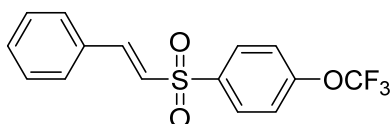

3ah

**(E)-1-(styrylsulfonyl)-4-(trifluoromethoxy)benzene (3ah)** <sup>[14]</sup>: White solid (35.6 mg, 54% yield, petroleum ether/ethyl acetate = 10/1); <sup>1</sup>H NMR (600 MHz, CDCl<sub>3</sub>) δ 8.01 - 8.00 (m, 2H), 7.71 (d, *J* = 15.4 Hz, 1H), 7.50 - 7.49 (m, 2H), 7.43 - 7.36 (m, 5H), 6.85 (d, *J* = 15.4 Hz, 1H). <sup>13</sup>C NMR (150 MHz, CDCl<sub>3</sub>) δ 152.8, 143.3, 139.2, 132.2, 131.5, 129.9, 129.2, 128.7, 126.8, 122.8, 121.2, 121.1, 119.4, 117.6; <sup>19</sup>F NMR (565 MHz, CDCl<sub>3</sub>) δ -57.7.

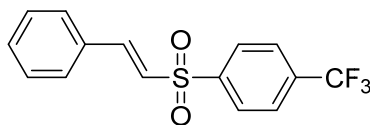

3ai

**(E)-1-(styrylsulfonyl)-4-(trifluoromethyl)benzene (3ai)** <sup>[12]</sup>: White solid (26.7 mg, 43% yield, petroleum ether/ethyl acetate = 10/1); <sup>1</sup>H NMR (600 MHz, CDCl<sub>3</sub>) δ 8.09 (d, *J* = 8.1 Hz, 2H), 7.82 (d, *J* = 8.2 Hz, 2H), 7.75 (d, *J* = 15.4 Hz, 1H), 7.50 (d, *J* = 7.4 Hz, 2H), 7.46 - 7.40 (m, 3H), 6.86 (d, *J* = 15.4 Hz, 1H). <sup>13</sup>C NMR (150 MHz, CDCl<sub>3</sub>) δ 144.4, 144.1, 135.1 (dd, *J*<sub>1</sub> = 33.1 Hz, *J*<sub>2</sub> = 66.3 Hz), 132.0, 131.7, 129.2, 128.7, 128.3, 126.5 (q, *J* = 3.6 Hz), 126.3, 123.2 (d, *J* = 273.2 Hz); <sup>19</sup>F NMR (565 MHz, CDCl<sub>3</sub>) δ -63.2.

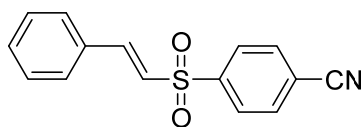

3aj

**(E)-4-(styrylsulfonyl)benzonitrile (3aj)** <sup>[14]</sup>: White solid (19.6 mg, 36% yield, petroleum ether/ethyl acetate = 10/1); <sup>1</sup>H NMR (600 MHz, CDCl<sub>3</sub>) δ 8.07 (d, *J* = 8.5 Hz, 2H), 7.85 (d, *J* = 8.5 Hz, 2H), 7.75 (d, *J* = 15.4 Hz, 1H), 7.51 - 7.40 (m, 5H), 6.84 (d, *J* = 15.4 Hz, 1H). <sup>13</sup>C NMR (150 MHz, CDCl<sub>3</sub>) δ 145.1, 144.7, 133.1, 131.9, 131.9, 129.3, 128.8, 128.3, 125.8, 117.2, 117.1.

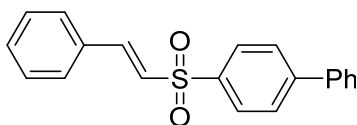

3ak



**(E)-4-(styrylsulfonyl)-1,1'-biphenyl (3ak):** White solid (36.7 mg, 57% yield, petroleum ether/ethyl acetate = 10/1);  $^1\text{H}$  NMR (600 MHz,  $\text{CDCl}_3$ )  $\delta$  8.01 (d,  $J$  = 8.5 Hz, 2H), 7.75 (d,  $J$  = 8.5 Hz, 2H), 7.72 (d,  $J$  = 15.4 Hz, 1H), 7.60 (d,  $J$  = 8.6 Hz, 2H), 7.51 - 7.48 (m, 4H), 7.44 - 7.38 (m, 4H), 6.91 (d,  $J$  = 15.4 Hz, 1H).  $^{13}\text{C}$  NMR (150 MHz,  $\text{CDCl}_3$ )  $\delta$  146.6, 142.6, 139.4, 132.6, 131.4, 129.2, 129.2, 128.7 (overlap), 128.4, 128.1, 127.6, 127.5. HRMS (ESI-TOF)  $m/z$ :  $[\text{M}+\text{H}]^+$  Calcd for  $\text{C}_{20}\text{H}_{17}\text{O}_2\text{S}$  321.0949; Found 321.0947.

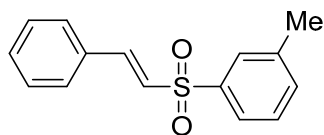

3al

**(E)-1-methyl-3-(styrylsulfonyl)benzene (3al)** <sup>[10]</sup>: White solid (35.5 mg, 69% yield, petroleum ether/ethyl acetate = 10/1);  $^1\text{H}$  NMR (600 MHz,  $\text{CDCl}_3$ )  $\delta$  7.75 (s, 2H), 7.68 (d,  $J$  = 15.4 Hz, 1H), 7.49 (d,  $J$  = 7.4 Hz, 2H), 7.44 - 7.38 (m, 5H), 6.90 (d,  $J$  = 15.4 Hz, 1H), 2.43 (s, 3H).  $^{13}\text{C}$  NMR (150 MHz,  $\text{CDCl}_3$ )  $\delta$  142.3, 140.5, 139.7, 134.2, 132.4, 131.2, 129.2, 129.1, 128.6, 128.0, 127.4, 124.8, 21.4.

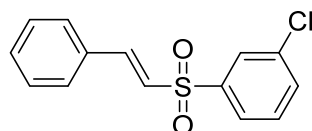

3am

**(E)-1-chloro-3-(styrylsulfonyl)benzene (3am)** <sup>[13]</sup>: White solid (25.0 mg, 45% yield, petroleum ether/ethyl acetate = 10/1);  $^1\text{H}$  NMR (600 MHz,  $\text{CDCl}_3$ )  $\delta$  7.94 (t,  $J$  = 1.8 Hz, 1H), 7.84 - 7.83 (m, 1H), 7.71 (d,  $J$  = 15.4 Hz, 1H), 7.58 - 7.26 (m, 7H), 6.85 (d,  $J$  = 15.4 Hz, 1H).  $^{13}\text{C}$  NMR (150 MHz,  $\text{CDCl}_3$ )  $\delta$  143.5, 142.6, 135.6, 133.5, 132.2, 131.5, 130.7, 129.2, 128.7, 127.8, 126.6, 125.8.

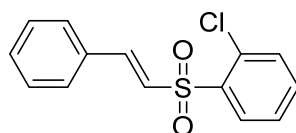

3an

**(E)-1-chloro-2-(styrylsulfonyl)benzene (3an)** <sup>[13]</sup>: White solid (29.5 mg, 53% yield, petroleum ether/ethyl acetate = 10/1);  $^1\text{H}$  NMR (600 MHz,  $\text{CDCl}_3$ )  $\delta$  8.23 (d,  $J$  = 8.0 Hz, 1H), 7.78 (d,  $J$  = 15.4 Hz, 1H), 7.56 - 7.40 (m, 8H), 7.08 (d,  $J$  = 15.4 Hz, 1H).  $^{13}\text{C}$  NMR (150 MHz,  $\text{CDCl}_3$ )  $\delta$  145.3, 138.3, 134.5, 132.9, 132.4, 131.9, 131.4, 130.7, 129.1, 128.7, 127.4, 125.3.

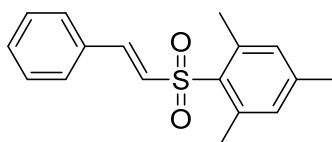

3ao

**(E)-1,3,5-trimethyl-2-(styrylsulfonyl)benzene (3ao):** White solid (19.5 mg, 34% yield, petroleum ether/ethyl acetate = 10/1);  $^1\text{H}$  NMR (600 MHz,  $\text{CDCl}_3$ )  $\delta$  7.60 (d,  $J$  = 15.4 Hz, 1H), 7.48 (d,  $J$  = 6.7 Hz, 2H), 7.39 (d,  $J$  = 6.7 Hz, 3H), 6.97 (s, 2H), 6.92 (d,  $J$  = 15.4 Hz, 1H), 2.68 (s, 6H), 2.31 (s, 3H).  $^{13}\text{C}$  NMR (150 MHz,  $\text{CDCl}_3$ )  $\delta$  143.4, 140.7, 140.1, 133.9, 132.7, 132.4, 131.0,

129.2, 128.6, 128.2, 23.1, 21.1. HRMS (ESI-TOF)  $m/z$ :  $[M+H]^+$  Calcd for  $C_{17}H_{19}O_2S$  287.1106; Found 287.1104.

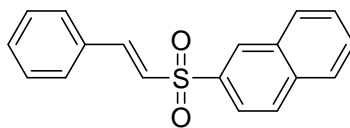

3ap

**(E)-2-(styrylsulfonyl)naphthalene (3ap)** <sup>[12]</sup>: White solid (42.2 mg, 72% yield, petroleum ether/ethyl acetate = 7/1);  $^1H$  NMR (600 MHz,  $CDCl_3$ )  $\delta$  8.55 (s, 1H), 8.00 (t,  $J$  = 7.7 Hz, 2H), 7.90 (dd,  $J_1$  = 8.6 Hz,  $J_2$  = 17.7 Hz, 2H), 7.75 (d,  $J$  = 15.4 Hz, 1H), 7.67 - 7.61 (m, 2H), 7.50 (d,  $J$  = 7.1 Hz, 2H), 7.41 - 7.37 (m, 3H), 6.92 (d,  $J$  = 15.4 Hz, 1H).  $^{13}C$  NMR (150 MHz,  $CDCl_3$ )  $\delta$  142.6, 137.5, 135.2, 132.4, 132.3, 131.2, 129.7, 129.4, 129.3, 129.2, 129.1, 128.6, 128.0, 127.7, 127.4, 122.6.

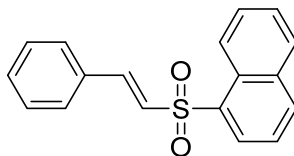

3aq

**(E)-1-(styrylsulfonyl)naphthalene (3aq)** <sup>[15]</sup>: White solid (36.0 mg, 61% yield, petroleum ether/ethyl acetate = 7/1);  $^1H$  NMR (600 MHz,  $CDCl_3$ )  $\delta$  8.74 (d,  $J$  = 8.6 Hz, 1H), 8.43 (d,  $J$  = 7.2 Hz, 1H), 8.12 (d,  $J$  = 8.0 Hz, 1H), 7.96 (d,  $J$  = 8.1 Hz, 1H), 7.82 (d,  $J$  = 15.2 Hz, 1H), 7.68 (t,  $J$  = 7.9 Hz, 1H), 7.63 - 7.59 (m, 2H), 7.47 (d,  $J$  = 7.1 Hz, 2H), 7.39 - 7.35 (m, 3H), 7.01 (d,  $J$  = 15.4 Hz, 1H).  $^{13}C$  NMR (150 MHz,  $CDCl_3$ )  $\delta$  142.8, 135.6, 135.3, 134.4, 132.5, 131.3, 130.0, 129.3, 129.2, 128.8, 128.7, 128.7, 127.7, 127.1, 124.7, 124.4.

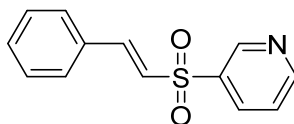

3ar

**(E)-3-(styrylsulfonyl)pyridine (3ar)** <sup>[13]</sup>: White solid (4.8 mg, 10% yield, petroleum ether/ethyl acetate = 10/1);  $^1H$  NMR (600 MHz,  $CDCl_3$ )  $\delta$  9.16 (s, 1H), 8.60 (d,  $J$  = 4.7 Hz, 1H), 8.23 (d,  $J$  = 8.0 Hz, 1H), 7.75 (d,  $J$  = 15.4 Hz, 1H), 7.51 - 7.40 (m, 6H), 6.87 (d,  $J$  = 15.4 Hz, 1H).  $^{13}C$  NMR (150 MHz,  $CDCl_3$ )  $\delta$  153.9, 148.9, 144.1, 137.4, 135.3, 132.0, 131.7, 129.2, 128.8, 126.6, 123.9.

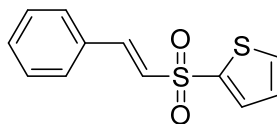

3as

**(E)-2-(styrylsulfonyl)thiophene (3as)** <sup>[16]</sup>: White solid (28.2 mg, 56% yield, petroleum ether/ethyl acetate = 10/1);  $^1H$  NMR (600 MHz,  $CDCl_3$ )  $\delta$  7.72 - 7.67 (m, 3H), 7.50 (d,  $J$  = 7.2 Hz, 2H), 7.43 - 7.39 (m, 3H), 7.14 (t,  $J$  = 4.0 Hz, 1H), 6.96 (d,  $J$  = 15.3 Hz, 1H).  $^{13}C$  NMR (150 MHz,  $CDCl_3$ )  $\delta$  142.3, 142.2, 133.9, 133.5, 132.3, 131.3, 129.1, 128.6, 128.0, 127.9.

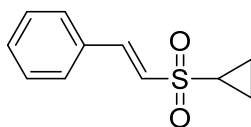

3at

**(E)-(2-(cyclopropylsulfonyl)vinyl)benzene (3at)** <sup>[12]</sup>: White solid (29.0 mg, 70% yield, petroleum ether:ethyl acetate = 7/1); <sup>1</sup>H NMR (600 MHz, CDCl<sub>3</sub>) δ 7.57 (d, *J* = 15.4 Hz, 1H), 7.53 - 7.51 (m, 2H), 7.43 - 7.42 (m, 3H), 6.90 (dd, *J*<sub>1</sub> = 0.5 Hz, *J*<sub>2</sub> = 15.4 Hz, 1H), 2.46 - 2.42 (m, 1H), 1.32 - 1.29 (m, 2H), 1.08 - 1.05 (m, 2H). <sup>13</sup>C NMR (150 MHz, CDCl<sub>3</sub>) δ 143.4, 132.6, 131.3, 129.3, 128.6, 125.8, 31.6, 5.5.

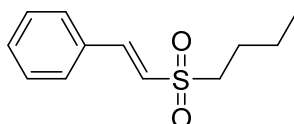

3au

**(E)-(2-(butylsulfonyl)vinyl)benzene (3au)** <sup>[17]</sup>: White solid (13.5 mg, 30% yield, petroleum ether/ethyl acetate = 10/1); <sup>1</sup>H NMR (600 MHz, CDCl<sub>3</sub>) δ 7.60 (d, *J* = 15.4 Hz, 1H), 7.53 (d, *J* = 7.4 Hz, 2H), 7.46 - 7.42 (m, 3H), 6.83 (d, *J* = 15.4 Hz, 1H), 3.06 (t, *J* = 8.2 Hz, 2H), 1.84 - 1.79 (m, 2H), 1.50 - 1.44 (m, 2H), 0.95 (t, *J* = 7.3 Hz, 3H). <sup>13</sup>C NMR (150 MHz, CDCl<sub>3</sub>) δ 144.8, 132.3, 131.4, 129.2, 128.6, 124.8, 55.0, 24.6, 21.7, 13.6.

## 5. X-Ray Structure of 3ba

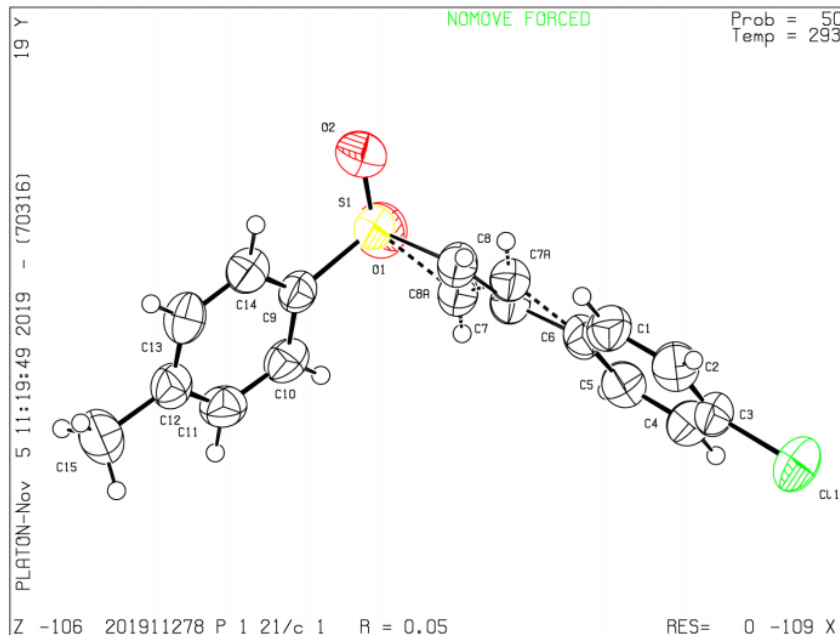

**Single-crystal X-ray Molecular Structure of 3ba in the solid state. Thermal ellipsoide at the 50% probability lever.**

The structure of **3ba** (containing little solvent) was determined by the X-ray diffraction. Recrystallized from Chloroform-D. Further information can be found in the CIF file. This crystal was deposited in the Cambridge Crystallographic Data Centre and assigned as CCDC 2033227.

**Table S14.** Crystal data and structure refinement for **3ba**.

|                                             |                                                               |                                       |
|---------------------------------------------|---------------------------------------------------------------|---------------------------------------|
| Identification code                         | 3ba                                                           |                                       |
| Empirical formula                           | C <sub>15</sub> H <sub>13</sub> ClO <sub>2</sub> S            |                                       |
| Formula weight                              | 292.76                                                        |                                       |
| Temperature                                 | 293(2) K                                                      |                                       |
| Crystal system, Space group                 | monoclinic, P2 <sub>1</sub> /c                                |                                       |
| Unit cell dimensions                        | a = 5.9131(4) Å<br>b = 7.2764(5) Å<br>c = 32.520(2) Å         | α = 90°<br>β = 94.268(5) °<br>γ = 90° |
| Volume/Å <sup>3</sup>                       | 1395.32(16)                                                   |                                       |
| Z, ρ <sub>calc</sub> /cm <sup>3</sup>       | 4, 1.394                                                      |                                       |
| μ/mm <sup>-1</sup>                          | 3.777                                                         |                                       |
| F(000)                                      | 608                                                           |                                       |
| Crystal size/mm <sup>3</sup>                | 0.17 × 0.09 × 0.08                                            |                                       |
| Radiation                                   | CuKα (λ = 1.54184)                                            |                                       |
| 2θ range for data collection/°              | 10.912 to 134.096                                             |                                       |
| Index ranges                                | -7 ≤ h ≤ 4, -8 ≤ k ≤ 8, -38 ≤ l ≤ 38                          |                                       |
| Reflections collected                       | 5017                                                          |                                       |
| Independent reflections                     | 2476 [R <sub>int</sub> = 0.0274, R <sub>sigma</sub> = 0.0413] |                                       |
| Data/restraints/parameters                  | 2476/0/180                                                    |                                       |
| Goodness-of-fit on F <sup>2</sup>           | 1.034                                                         |                                       |
| Final R indexes [I >= 2σ (I)]               | R <sub>1</sub> = 0.0520, wR <sub>2</sub> = 0.1316             |                                       |
| Final R indexes [all data]                  | R <sub>1</sub> = 0.0683, wR <sub>2</sub> = 0.1506             |                                       |
| Largest diff. peak/hole / e Å <sup>-3</sup> | 0.32/-0.28                                                    |                                       |

**Table S15.** Bond Lengths (Å) and bond angles (°) for **3ba**.

|            |           |             |           |
|------------|-----------|-------------|-----------|
| C(1)-C(2)  | 1.386(5)  | C(8A)-S(1)  | 1.826(17) |
| C(1)-C(6)  | 1.389(5)  | C(9)-C(10)  | 1.386(4)  |
| C(2)-C(3)  | 1.375(5)  | C(9)-C(14)  | 1.377(4)  |
| C(3)-C(4)  | 1.366(5)  | C(9)-S(1)   | 1.769(3)  |
| C(3)-C(11) | 1.740(3)  | C(10)-C(11) | 1.376(4)  |
| C(4)-C(5)  | 1.363(5)  | C(11)-C(12) | 1.380(4)  |
| C(5)-C(6)  | 1.380(5)  | C(12)-C(13) | 1.377(4)  |
| C(6)-C(7)  | 1.479(5)  | C(12)-C(15) | 1.518(4)  |
| C(6)-C(7A) | 1.580(19) | C(13)-C(14) | 1.380(4)  |
| C(7)-C(8)  | 1.316(6)  | O(1)-S(1)   | 1.412(3)  |

|                  |           |                   |            |
|------------------|-----------|-------------------|------------|
| C(7A)-C(8A)      | 1.28(3)   | O(2)-S(1)         | 1.436(3)   |
| C(8)-S(1)        | 1.762(4)  |                   |            |
| C(2)-C(1)-C(6)   | 121.3(3)  | C(14)-C(9)-S(1)   | 119.7(2)   |
| C(3)-C(2)-C(1)   | 118.2(4)  | C(11)-C(10)-C(9)  | 118.7(3)   |
| C(2)-C(3)-C(11)  | 119.2(3)  | C(10)-C(11)-C(12) | 121.7(3)   |
| C(4)-C(3)-C(2)   | 121.5(3)  | C(11)-C(12)-C(15) | 120.9(3)   |
| C(4)-C(3)-C(11)  | 119.4(3)  | C(13)-C(12)-C(11) | 118.3(3)   |
| C(5)-C(4)-C(3)   | 119.7(3)  | C(13)-C(12)-C(15) | 120.8(3)   |
| C(4)-C(5)-C(6)   | 121.3(3)  | C(12)-C(13)-C(14) | 121.3(3)   |
| C(1)-C(6)-C(7)   | 126.3(3)  | C(9)-C(14)-C(13)  | 119.2(3)   |
| C(1)-C(6)-C(7A)  | 96.5(9)   | C(8)-S(1)-C(9)    | 104.85(15) |
| C(5)-C(6)-C(1)   | 118.1(3)  | C(9)-S(1)-C(8A)   | 102.4(5)   |
| C(5)-C(6)-C(7)   | 115.6(4)  | O(1)-S(1)-C(8)    | 112.88(18) |
| C(5)-C(6)-C(7A)  | 145.4(9)  | O(1)-S(1)-C(8A)   | 83.1(6)    |
| C(8)-C(7)-C(6)   | 124.4(4)  | O(1)-S(1)-C(9)    | 107.88(16) |
| C(8A)-C(7A)-C(6) | 111.9(18) | O(1)-S(1)-O(2)    | 118.93(19) |
| C(7)-C(8)-S(1)   | 119.0(3)  | O(2)-S(1)-C(8)    | 103.48(18) |
| C(7A)-C(8A)-S(1) | 114.0(16) | O(2)-S(1)-C(8A)   | 133.1(6)   |
| C(10)-C(9)-S(1)  | 119.4(2)  | O(2)-S(1)-C(9)    | 107.88(15) |
| C(14)-C(9)-C(10) | 120.7(3)  |                   |            |

## 6. Mechanistic studies

### 6.1 Effect of radical scavengers and control experiments

To gain insight into the process of the present reaction, the radical scavengers TEMPO (2,2,6,6-tetramethyl-1-piperidinyloxy) and 1,1-diphenylethylene was added separately into the standard reaction system (**Scheme 6.1a**, **Scheme 6.1b**). To further clarify the reaction pathway of the dehydrogenative olefinsulfonation, experiments with styrene instead of ethylbenzene were carried out under the standard conditions (**Scheme 6.1c**).

#### a) addition of TEMPO

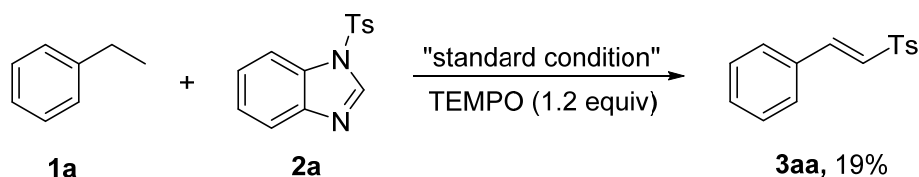

Under Standard Procedure for the Olefinsulfonation, In a 10 mL oven-dried Schlenk tube equipped with a stirrer bar was charged with ethylbenzene (171  $\mu$ L, 1.4 mmol), N-sulfonyl-benzo[d]imidazole (54.4 mg, 0.2 mmol), Copper(I) triflate toluene complex (10.34 mg, 10 mol%), 3,4,7,8-Tetramethyl-1,10-phenanthroline (2.8 mg, 6 mol%), N-Chlorosuccinimide (31.9 mg, 1.2 equiv),  $\text{Fe}(\text{ClO}_4)_3 \cdot x\text{H}_2\text{O}$  (7.08 mg, 10 mol%),  $\text{Li}_2\text{CO}_3$  (29.6 mg, 2.0 equiv), Di-tert-butyl peroxide (74  $\mu$ L, 2 equiv), 3 Å (25 mg), LiBr (34.8 mg, 2.0 equiv), TEMPO (62.5 mg, 1.2 equiv) for **Scheme 6.1a**, followed by the addition of anhydrous toluene (1.0 mL). The resulting solution was stirred at 120 °C for 36 h on an aluminum sand bath under an argon atmosphere. After cooling to room temperature, the reaction was quenched with water (30 mL) and extracted with dichloromethane (30 mL  $\times$  3), the organic layer was dried over  $\text{Na}_2\text{SO}_4$  and

concentrated under reduced pressure. The crude product was purified by flash chromatography on silica gel (petroleum ether/ethyl acetate = 10/1) to afford (E)-1-methyl-4-(styrylsulfonyl)benzene as white solid (9.8 mg, 19% yield) .

b) addition of BHT

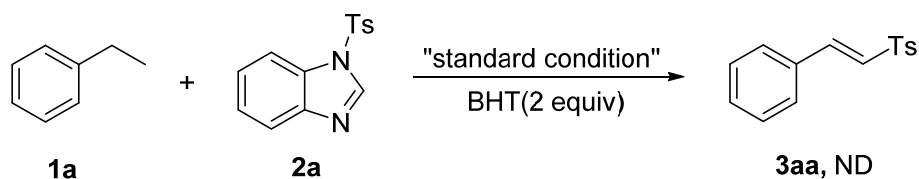

In a 10 mL oven-dried Schlenk tube equipped with a stirrer bar was charged with alkyl arenes compounds (171  $\mu$ L, 1.4 mmol), N-sulfonyl-benzo[d]imidazole (54.4 mg, 0.2 mmol), Copper(I) triflate toluene complex (10.34 mg, 10 mol%), 3,4,7,8-Tetramethyl-1,10-phenanthroline (2.8 mg, 6 mol%), N-Chlorosuccinimide (31.9 mg, 1.2 equiv),  $\text{Fe}(\text{ClO}_4)_3 \cdot x\text{H}_2\text{O}$  (7.08 mg, 10 mol%),  $\text{Li}_2\text{CO}_3$  (29.6 mg, 2.0 equiv), Di-tert-butyl peroxide (74  $\mu$ L, 2 equiv),  $3\text{\AA}$  (25 mg), LiBr (34.8 mg, 2.0 equiv), BHT (88.1 mg, 2.0 equiv) for **Scheme 6.1b**, followed by the addition of anhydrous toluene (1.0 mL). The resulting solution was stirred at 120  $^\circ\text{C}$  for 36 h on an aluminum sand bath under an argon atmosphere. The reaction did not occur and no desired product was detected by TLC.

c) control experiment

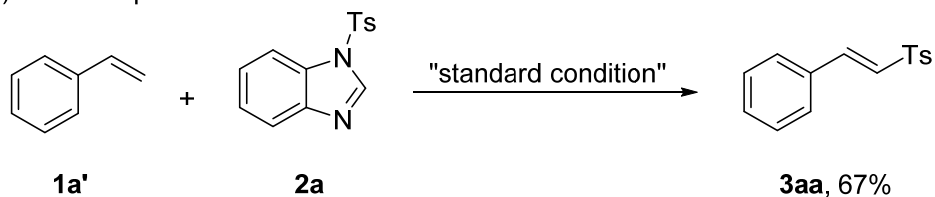

In a 10 mL oven-dried Schlenk tube equipped with a stirrer bar was charged with styrene (161  $\mu$ L, 1.4 mmol), N-sulfonyl-benzo[d]imidazole (54.4 mg, 0.2 mmol), Copper(I) triflate toluene complex (10.34 mg, 10 mol%), 3,4,7,8-Tetramethyl-1,10-phenanthroline (2.8 mg, 6 mol%), N-Chlorosuccinimide (31.9 mg, 1.2 equiv),  $\text{Fe}(\text{ClO}_4)_3 \cdot x\text{H}_2\text{O}$  (7.08 mg, 10 mol%),  $\text{Li}_2\text{CO}_3$  (29.6 mg, 2.0 equiv), Di-tert-butyl peroxide (74  $\mu$ L, 2 equiv),  $3\text{\AA}$  (25 mg), LiBr (34.8 mg, 2.0 equiv), followed by the addition of anhydrous toluene (1.0 mL). The resulting solution was stirred at 120  $^\circ\text{C}$  for 36 h on an aluminum sand bath under an argon atmosphere. After cooling to room temperature, the reaction was quenched with water (30 mL) and extracted with dichloromethane (30 mL  $\times$  3), the organic layer was dried over  $\text{Na}_2\text{SO}_4$  and concentrated under reduced pressure. The crude product was purified by flash chromatography on silica gel (petroleum ether/ethyl acetate = 10/1) to afford (E)-1-methyl-4-(styrylsulfonyl)benzene as white solid (35 mg, 67%).

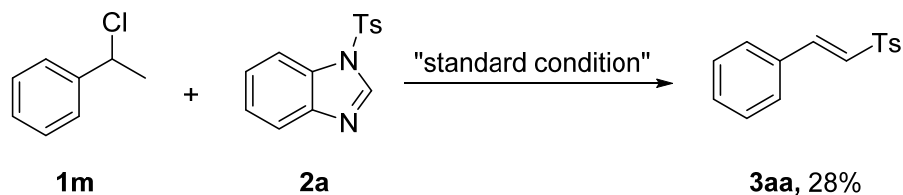

In a 10 mL oven-dried Schlenk tube equipped with a stirrer bar was charged with (1-chloroethyl)benzene (1.4 mmol), N-sulfonyl-benzo[d]imidazole (54.4 mg, 0.2 mmol), Copper(I) triflate toluene complex (10.34 mg, 10 mol%), 3,4,7,8-Tetramethyl-1,10-phenanthroline (2.8 mg,

6 mol%),  $\text{Fe}(\text{ClO}_4)_3 \cdot x\text{H}_2\text{O}$  (7.08 mg, 10 mol%),  $\text{Li}_2\text{CO}_3$  (29.6 mg, 2.0 equiv), Di-tert-butyl peroxide (74  $\mu\text{L}$ , 2 equiv),  $3\text{\AA}$  (25 mg), LiBr (34.8 mg, 2.0 equiv), followed by the addition of anhydrous toluene (1.0 mL). The resulting solution was stirred at 120 °C for 36 h on an aluminum sand bath under an argon atmosphere. After cooling to room temperature, the reaction was quenched with water (30 mL) and extracted with dichloromethane (30 mL  $\times$  3), the organic layer was dried over  $\text{Na}_2\text{SO}_4$  and concentrated under reduced pressure. The crude product was purified by flash chromatography on silica gel (petroleum ether/ethyl acetate = 10/1) to afford (E)-1-methyl-4-(styrylsulfonyl)benzene as white solid (14 mg, 28%).

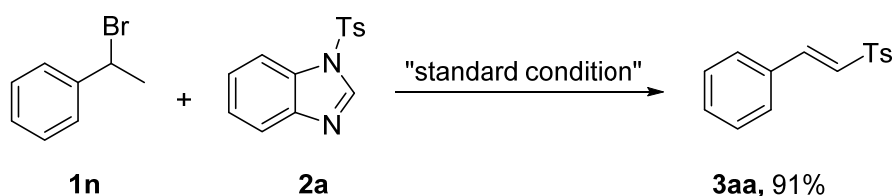

In a 10 mL oven-dried Schlenk tube equipped with a stirrer bar was charged with (1-bromoethyl)benzene (1.4 mmol), N-sulfonyl-benzo[d]imidazole (54.4 mg, 0.2 mmol), Copper(I) triflate toluene complex (10.34 mg, 10 mol%), 3,4,7,8-Tetramethyl-1,10-phenanthroline (2.8 mg, 6 mol%), N-Chlorosuccinimide (31.9 mg, 1.2 equiv),  $\text{Fe}(\text{ClO}_4)_3 \cdot x\text{H}_2\text{O}$  (7.08 mg, 10 mol%),  $\text{Li}_2\text{CO}_3$  (29.6 mg, 2.0 equiv), Di-tert-butyl peroxide (74  $\mu\text{L}$ , 2 equiv),  $3\text{\AA}$  (25 mg), followed by the addition of anhydrous toluene (1.0 mL). The resulting solution was stirred at 120 °C for 36 h on an aluminum sand bath under an argon atmosphere. After cooling to room temperature, the reaction was quenched with water (30 mL) and extracted with dichloromethane (30 mL  $\times$  3), the organic layer was dried over  $\text{Na}_2\text{SO}_4$  and concentrated under reduced pressure. The crude product was purified by flash chromatography on silica gel (petroleum ether/ethyl acetate = 10/1) to afford (E)-1-methyl-4-(styrylsulfonyl)benzene as white solid (47 mg, 91%).

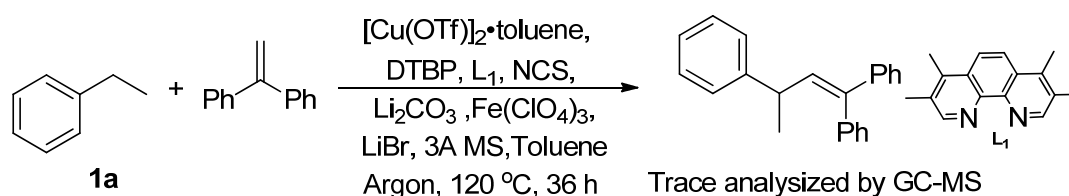

In a 10 mL oven-dried Schlenk tube equipped with a stirrer bar was charged with ethylbenzene (171  $\mu\text{L}$ , 1.4 mmol), diphenylethene (36 mg, 0.2 mmol), Copper(I) triflate toluene complex (10.34 mg, 10 mol%), 3,4,7,8-Tetramethyl-1,10-phenanthroline (2.8 mg, 6 mol%), N-Chlorosuccinimide (31.9 mg, 1.2 equiv),  $\text{Fe}(\text{ClO}_4)_3 \cdot x\text{H}_2\text{O}$  (7.08 mg, 10 mol%),  $\text{Li}_2\text{CO}_3$  (29.6 mg, 2.0 equiv), Di-tert-butyl peroxide (74  $\mu\text{L}$ , 2 equiv),  $3\text{\AA}$  (25 mg), followed by the addition of anhydrous toluene (1.0 mL). The resulting solution was stirred at 120 °C on an aluminum sand bath for 36 h under an argon atmosphere. The reaction afforded a trace desired product which was detected by GC-MS (MW: 284.40).

## 6.2 kinetic isotope effect

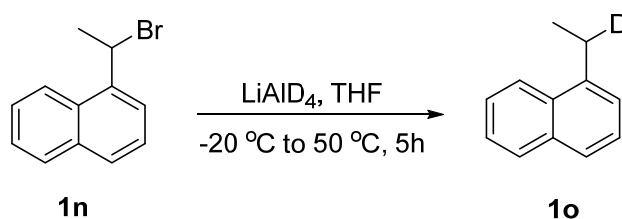

The synthetic procedure was similar to a previous report<sup>[18]</sup> 1-(1-bromoethyl)naphthalene (730 mg, 3 mmol) and anhydrous THF solvent (10 mL) was added to an oven-dried 100 mL-round bottom flask. The solution was cooling down to  $-20\text{ }^{\circ}\text{C}$ , and then  $\text{LiAlD}_4$  (252 mg, 6 mmol) was added to the solution. The reaction mixture was slowly warmed to room temperature and stirred for 5 h. Ice-water was added dropwise to the solution at  $-20\text{ }^{\circ}\text{C}$ . The solution was slowly warmed to room temperature and extraction with *n*-pentane (3 x 30 mL). The combined organics were dried with  $\text{MgSO}_4$  and the solvent was removed under vacuum. The residue was purified by column chromatography on silica gel using *n*-pentane as the eluent to yield the desired product of 1-(ethyl-1-d)naphthalene as colorless oil (236 mg, 50%).  $^1\text{H}$  NMR (600 MHz,  $\text{CDCl}_3$ )  $\delta$  8.04 (d,  $J = 8.34\text{ Hz}$ , 1H), 7.84 (d,  $J = 8.04\text{ Hz}$ , 1H), 7.70 (d,  $J = 8.16\text{ Hz}$ , 1H), 7.44 - 7.51 (m, 2H), 7.40 (t,  $J_1 = J_2 = 8.34\text{ Hz}$ , 1H), 7.33 (d,  $J = 6.96\text{ Hz}$ , 1H), 3.10 (q,  $J = 14.70\text{ Hz}$ , 1H), 1.37 (d,  $J = 7.56\text{ Hz}$ , 3H).

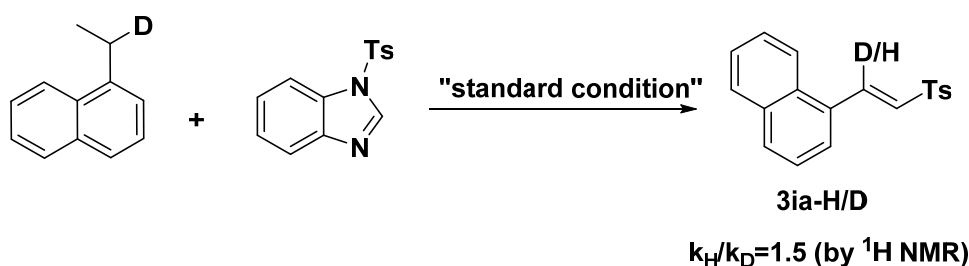

To a 10 mL oven-dried Schlenk tube with a stirrer bar was charged with 1-(ethyl-1-d)naphthalene (220 mg, 1.4 mmol), N-sulfonyl-benzo[d]imidazole (55.4 mg, 0.2 mmol), Copper(I) triflate toluene complex (10.34 mg, 10 mol%), 3,4,7,8-Tetramethyl-1,10-phenanthroline (2.8 mg, 6 mol%), N-Chlorosuccinimide (31.9 mg, 1.2 equiv),  $\text{Fe}(\text{ClO}_4)_3 \cdot x\text{H}_2\text{O}$  (7.08 mg, 10 mol%),  $\text{Li}_2\text{CO}_3$  (29.6 mg, 2.0 equiv), Di-tert-butyl peroxide (74  $\mu\text{L}$ , 2 equiv), 3 $\text{\AA}$  (25 mg) and LiBr (34.8 mg, 2.0 equiv), followed by addition of anhydrous toluene (1.0 mL). The resulting solution was stirred at  $120\text{ }^{\circ}\text{C}$  for 36 hours on an aluminum sand bath under an argon atmosphere. After cooling to room temperature, the reaction quenched with water and extracted with and dichloromethane (30 mL  $\times$  3), the organic layer was dried over  $\text{Na}_2\text{SO}_4$  and concentrated under reduced pressure. The crude product was purified by flash chromatography on silica gel (petroleum ether/ethyl acetate = 10/1) to afford **3ia-H/D** as white solid.  $^1\text{H}$  NMR (600 MHz,  $\text{CDCl}_3$ )  $\delta$  8.05 (d,  $J = 15.60\text{ Hz}$ , 0.4 H), 8.17 (d,  $J = 8.4\text{ Hz}$ , 1H), 7.92 (d,  $J = 8.4\text{ Hz}$ , 1H), 7.89 (d,  $J = 8.4\text{ Hz}$ , 3H), 7.66 - 7.67 (m, 1H), 7.61 - 7.65 (m, 1H), 7.55 - 7.60 (m, 1H), 7.44 - 7.47 (m, 1H), 7.37 (d,  $J = 8.4\text{ Hz}$ , 2H), 6.94 - 6.96 (m, 1H), 2.44 (s, 3H).  $^{13}\text{C}$  NMR (151 MHz,  $\text{CDCl}_3$ )  $\delta$  140.3, 133.9, 131.8, 128.8, 126.4, 125.7, 125.4, 124.9, 123.8, 25.7, 25.6, 25.5, 15.0.

## 7. Gram-scale reaction

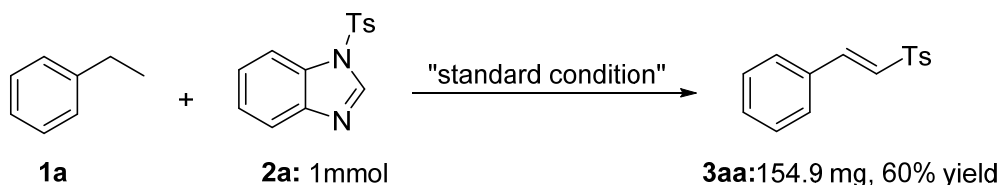

The procedure for 1 mmol-scale reaction was as follows. In a 25 mL oven-dried Schlenk tube equipped with a stirrer bar was charged with ethylbenzene (855  $\mu\text{L}$ , 7 mmol), N-sulfonyl-benzo[d]imidazole (272.5 mg, 1 mmol), Copper(I) triflate toluene complex (51.7 mg,



10 mol%), 3,4,7,8-Tetramethyl-1,10-phenanthroline (14 mg, 6 mol%), N-Chlorosuccinimide (159.5 mg, 1.2 equiv),  $\text{Fe}(\text{ClO}_4)_3 \cdot x\text{H}_2\text{O}$  (35.4 mg, 10 mol%),  $\text{Li}_2\text{CO}_3$  (148 mg, 2.0 equiv), Di-tert-butyl peroxide (370  $\mu\text{l}$ , 2 equiv),  $3\text{\AA}$  (125 mg), LiBr (174 mg, 2.0 equiv), followed by the addition of anhydrous toluene (5.0 mL). The resulting solution was stirred at 120 °C for 36 h on an aluminum sand bath under an argon atmosphere. After cooling to room temperature, the reaction quenched with water (30 mL) and extracted with dichloromethane (30 mL  $\times$  3), the organic layer was dried over  $\text{Na}_2\text{SO}_4$  and concentrated under reduced pressure. The crude product was purified by flash chromatography on silica gel (petroleum ether/ethyl acetate = 10/1) to afford (E)-1-methyl-4-(styrylsulfonyl)benzene as white solid (154.9 mg, 60%).

## 8. References

- [1] a) Sumrit, P.; Chuawong, P. T.; Nanok, T.; Duangthongyou, T.; Hormnirun, P. *Dalton Trans.*, **2016**, 45, 9250–9266. b) Tandiary, M. A.; Masui, Y.; Onaka, M. *Tetrahedron Lett.*, **2014**, 55, 4160–4162.
- [2] Nam, S. W.; Kang, S. H.; Chang, Y. *Macromolecular Research*, **2007**, 15(1), 74–81.
- [3] Liu, S.; Tzschucke, C. *Eur. J. Org. Chem.*, **2016**, 3509–3513.
- [4] Shyam, P.; Son, S.; Jang, S. *Eur. J. Org. Chem.*, **2017**, 5025–5031.
- [5] Hu, D.; Bai, F.; Wan, J. *Chin. J. Chem.*, **2016**, 34, 1053–1057.
- [6] Chu, X.; Ge, D.; Shen, Z. *Org. Chem. Front.*, **2019**, 6, 835–840.
- [7] Rong, G.; Mao, J.; Zhang, G. *J. Org. Chem.*, **2015**, 80, 4697–4703.
- [8] Yalavarthi, N.; Bokam, R.; Ponnaoli. M. *J. Chem. Sci.* **2019**, 131, 1–8.
- [9] Kadari, L.; Palakodety, R.; Yallapragada, L. *Org. Lett.*, **2017**, 19, 2580–2583.
- [10] Wang, L.; Yue, H.; Wang, H. *J. Org. Chem.*, **2017**, 82, 6857–6864.
- [11] Reeves, D.; Rodriguez, S.; Senanayake, C. *Tetrahedron Letters.*, **2009**, 50, 2870–2873.
- [12] Li, S.; Li, X.; Yang, F.; Wu, Y. *Org. Chem. Front.*, **2015**, 2, 1076–1079.
- [13] Mao, R.; Ding, Y.; Fan, X.; Wu, J. *Org. Chem. Front.*, **2016**, 3, 1498–1502.
- [14] Cai, S.; Weng, W. *Org. Lett.*, **2016**, 18, 2990–2993.
- [15] Pramanik, M.; Choudhuri, K.; Mal, P.; *Asian J. Org. Chem.*, **2019**, 8, 144–150.
- [16] Li, X.; Xu, Y.; Jiang, H. *Chem. Eur. J.*, **2014**, 20, 7911–7915.
- [17] Pramanik, M.; Choudhuri, K.; Mal, P. *Asian J. Org. Chem.*, **2019**, 8, 144–150.
- [18] Xie, W. L.; Heo, J.; Kim, D.; Chang, S. *J. Am. Chem. Soc.*, **2020**, 142, 7487–7496.

## 9. Images of $^1\text{H}$ , $^{13}\text{C}$ NMR, $^{19}\text{F}$ NMR, HRMS Spectra

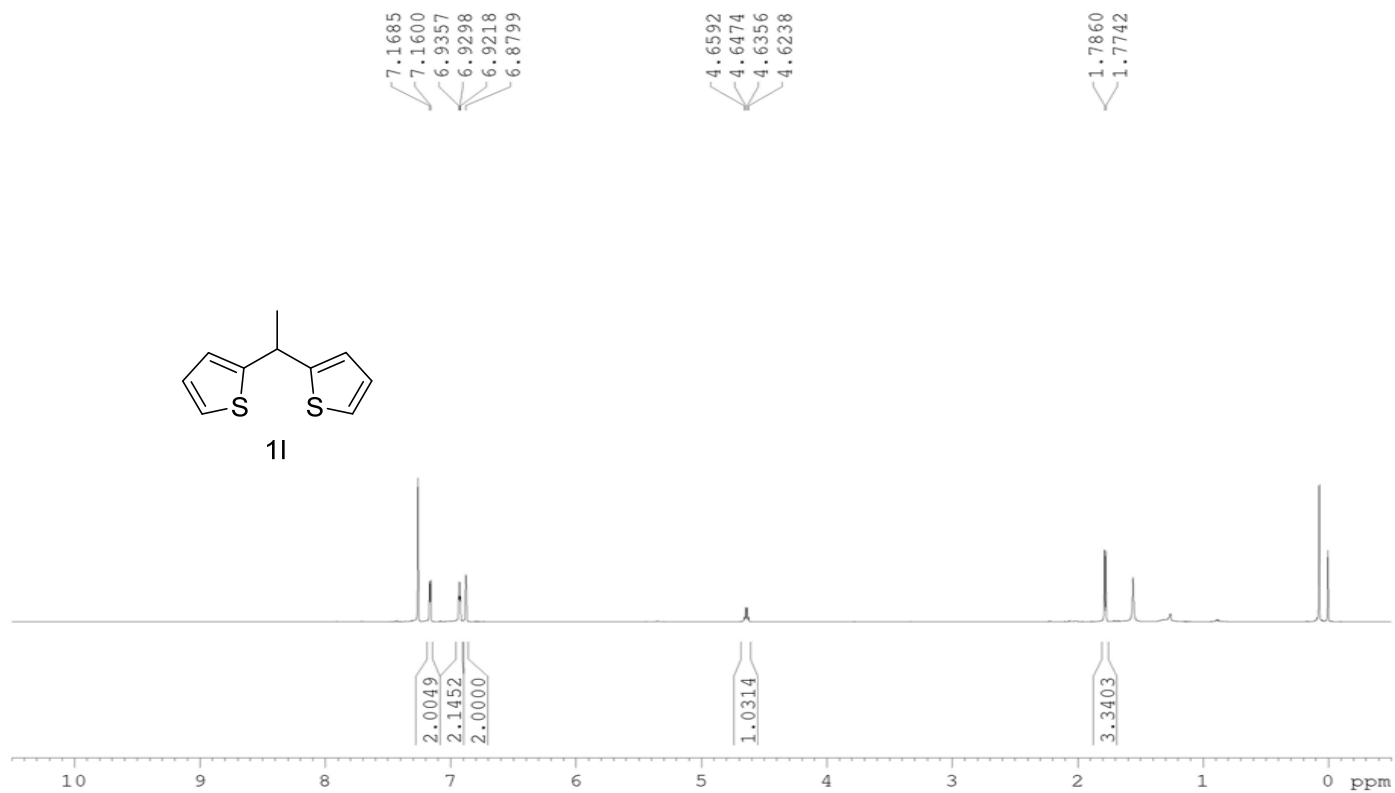

$^1\text{H}$  NMR spectrum of compound 1l in  $\text{CDCl}_3$  (600 MHz)

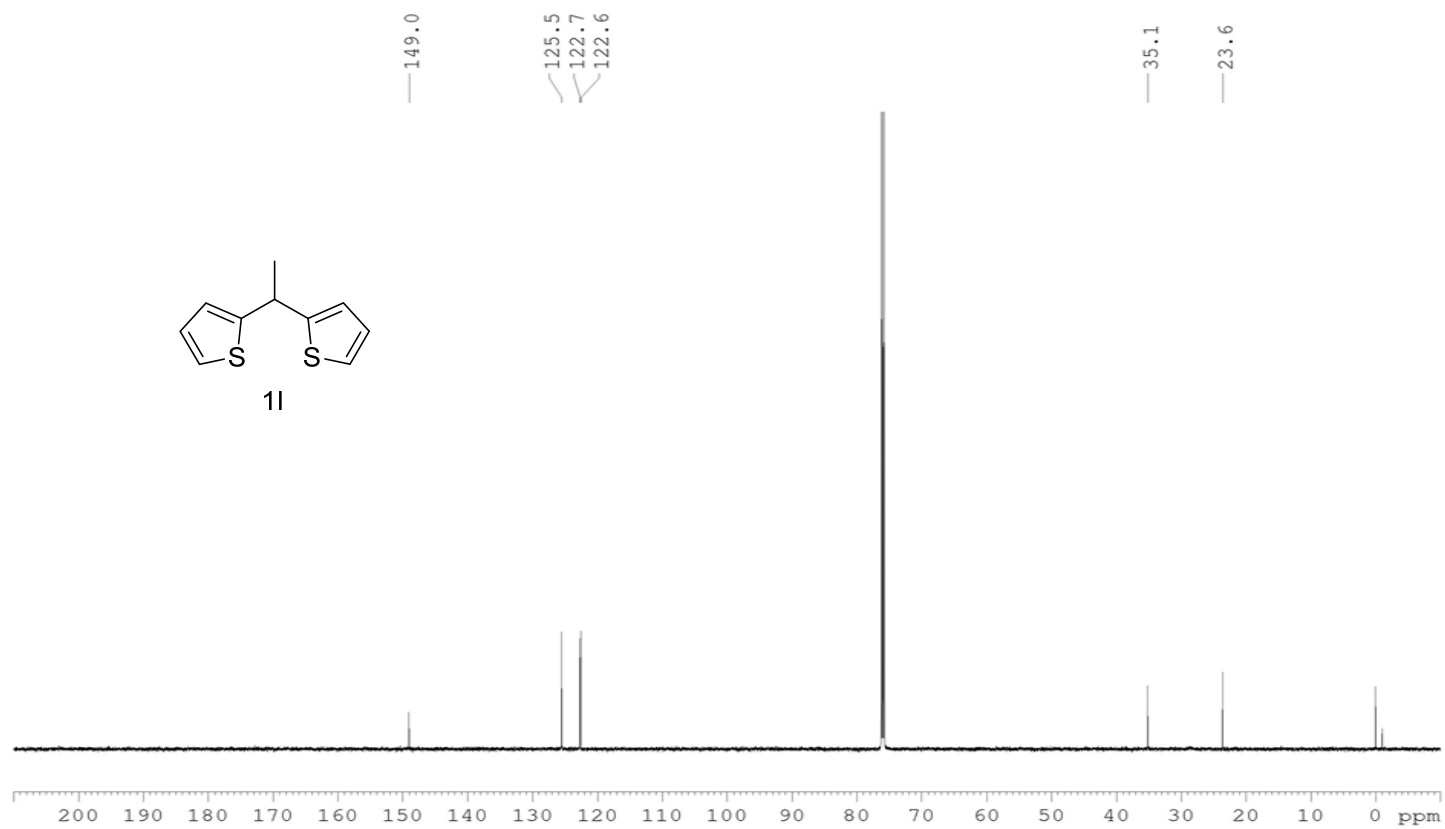

<sup>13</sup>C NMR spectrum of compound 11 in CDCl<sub>3</sub> (150 MHz)

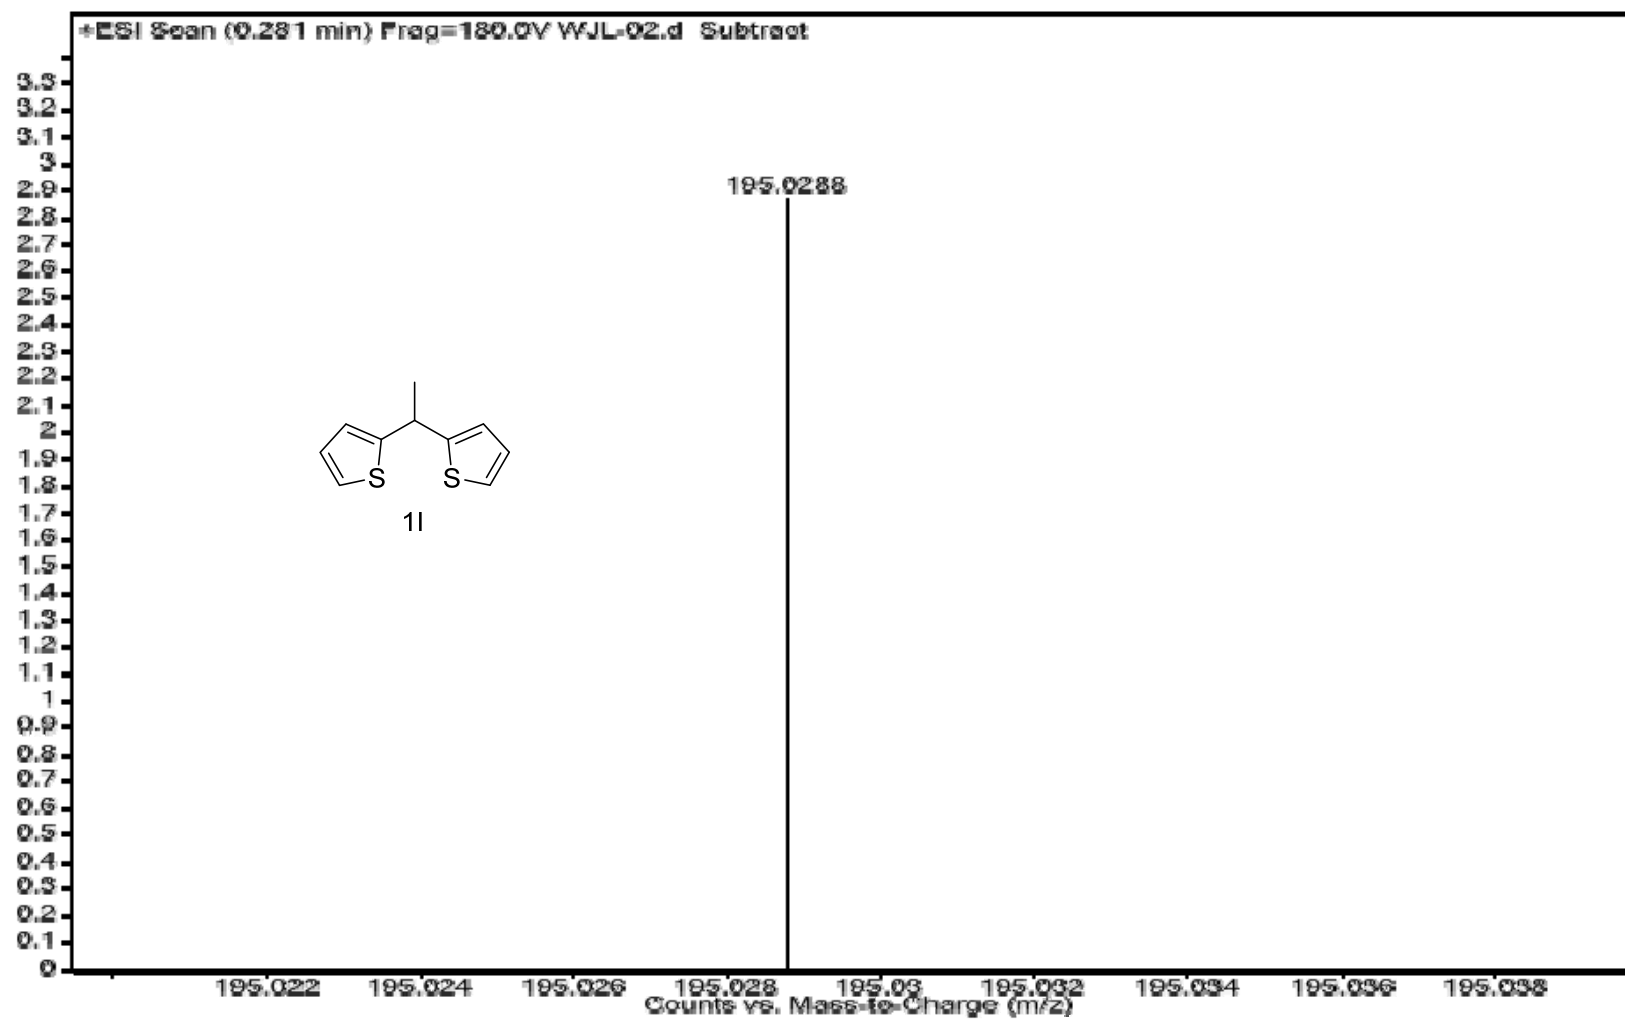

HRMS spectrum of compound 11

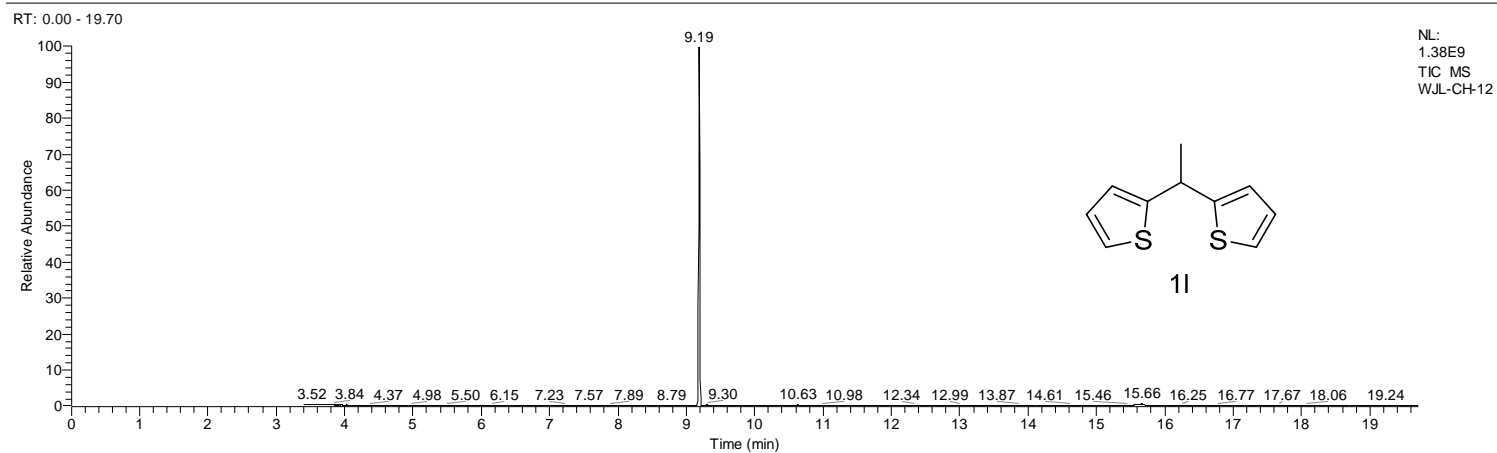

WJL-CH-12 #1703 RT: 9.19 AV: 1 SB: 12 9.09-9.13 NL: 3.53E8  
T: (0,0) + c EI Full ms [40.00-500.00]

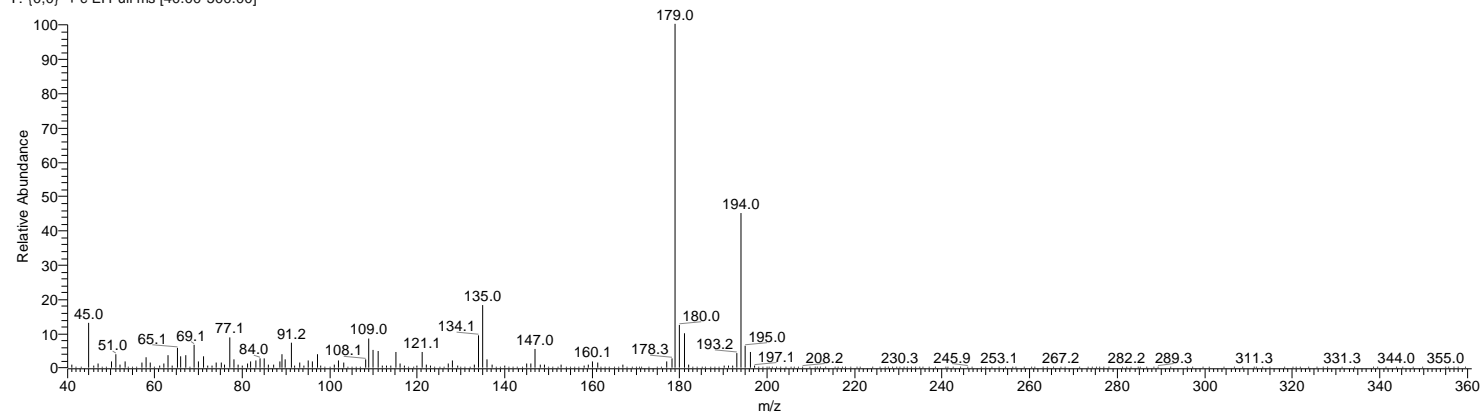

GC-MS spectrum of compound 11

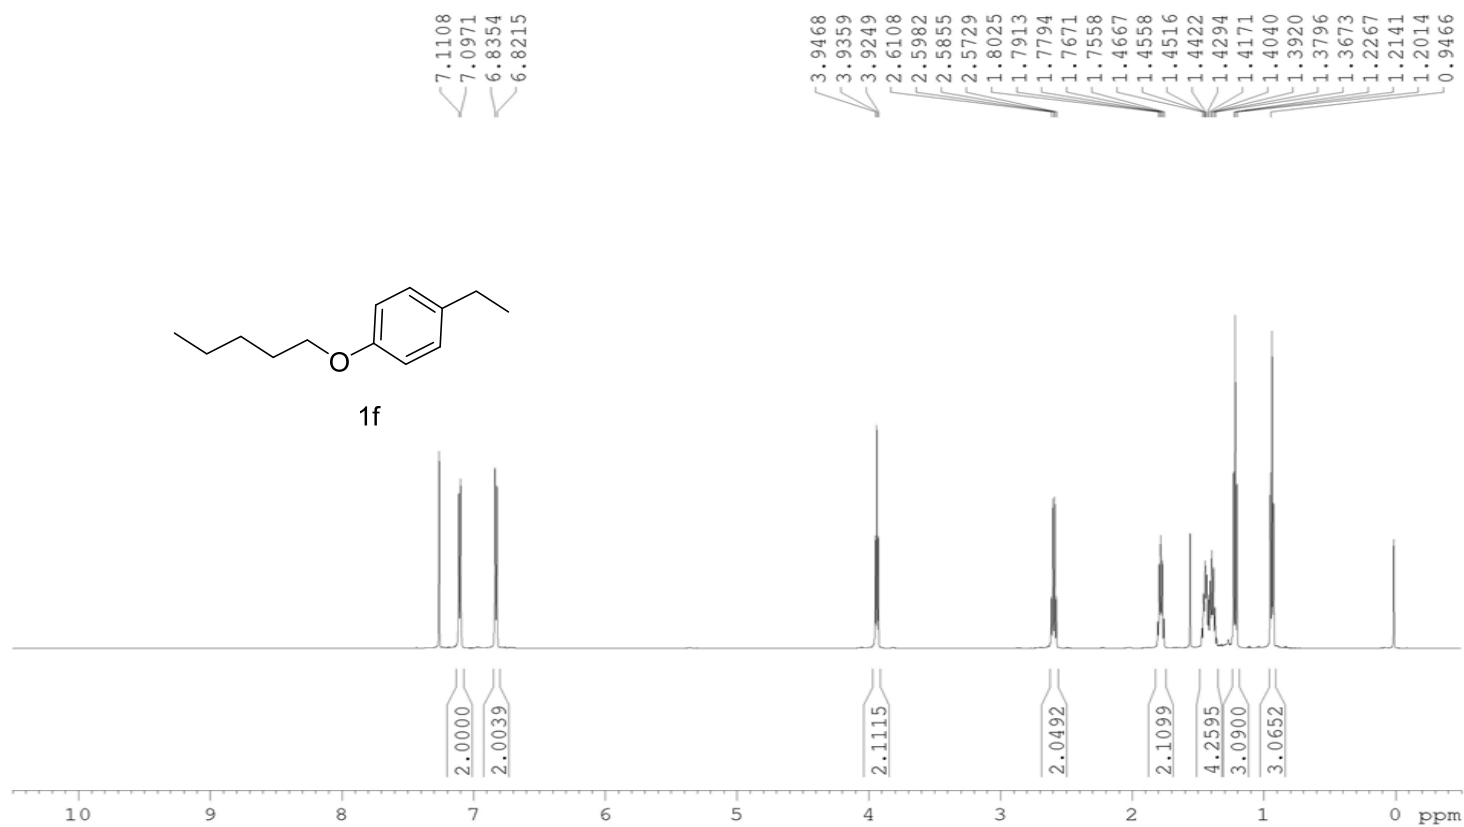

<sup>1</sup>H NMR spectrum of compound 1f in CDCl<sub>3</sub> (600 MHz)

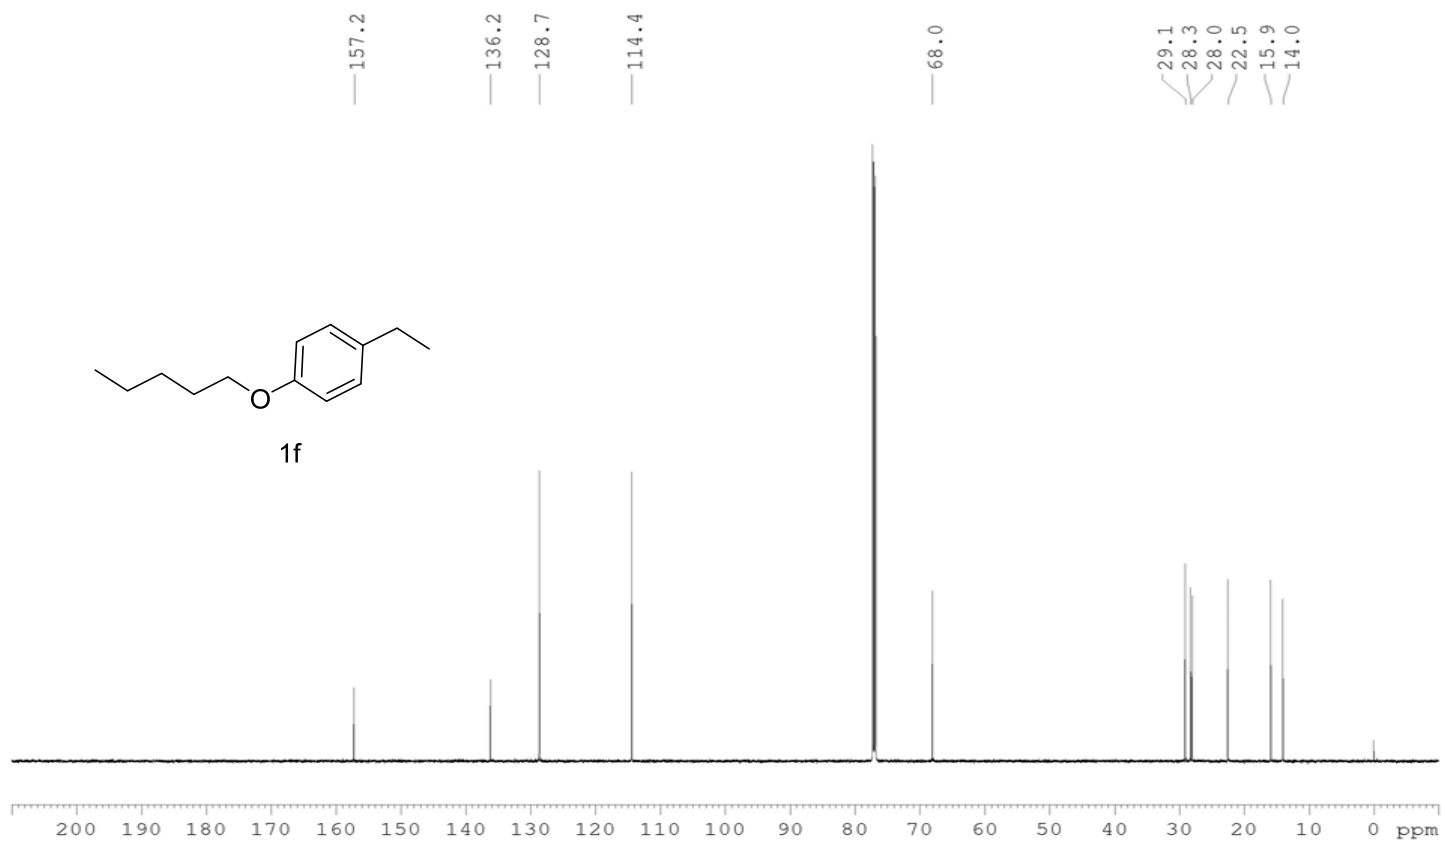

<sup>13</sup>C NMR spectrum of compound 1f in CDCl<sub>3</sub> (150 MHz)



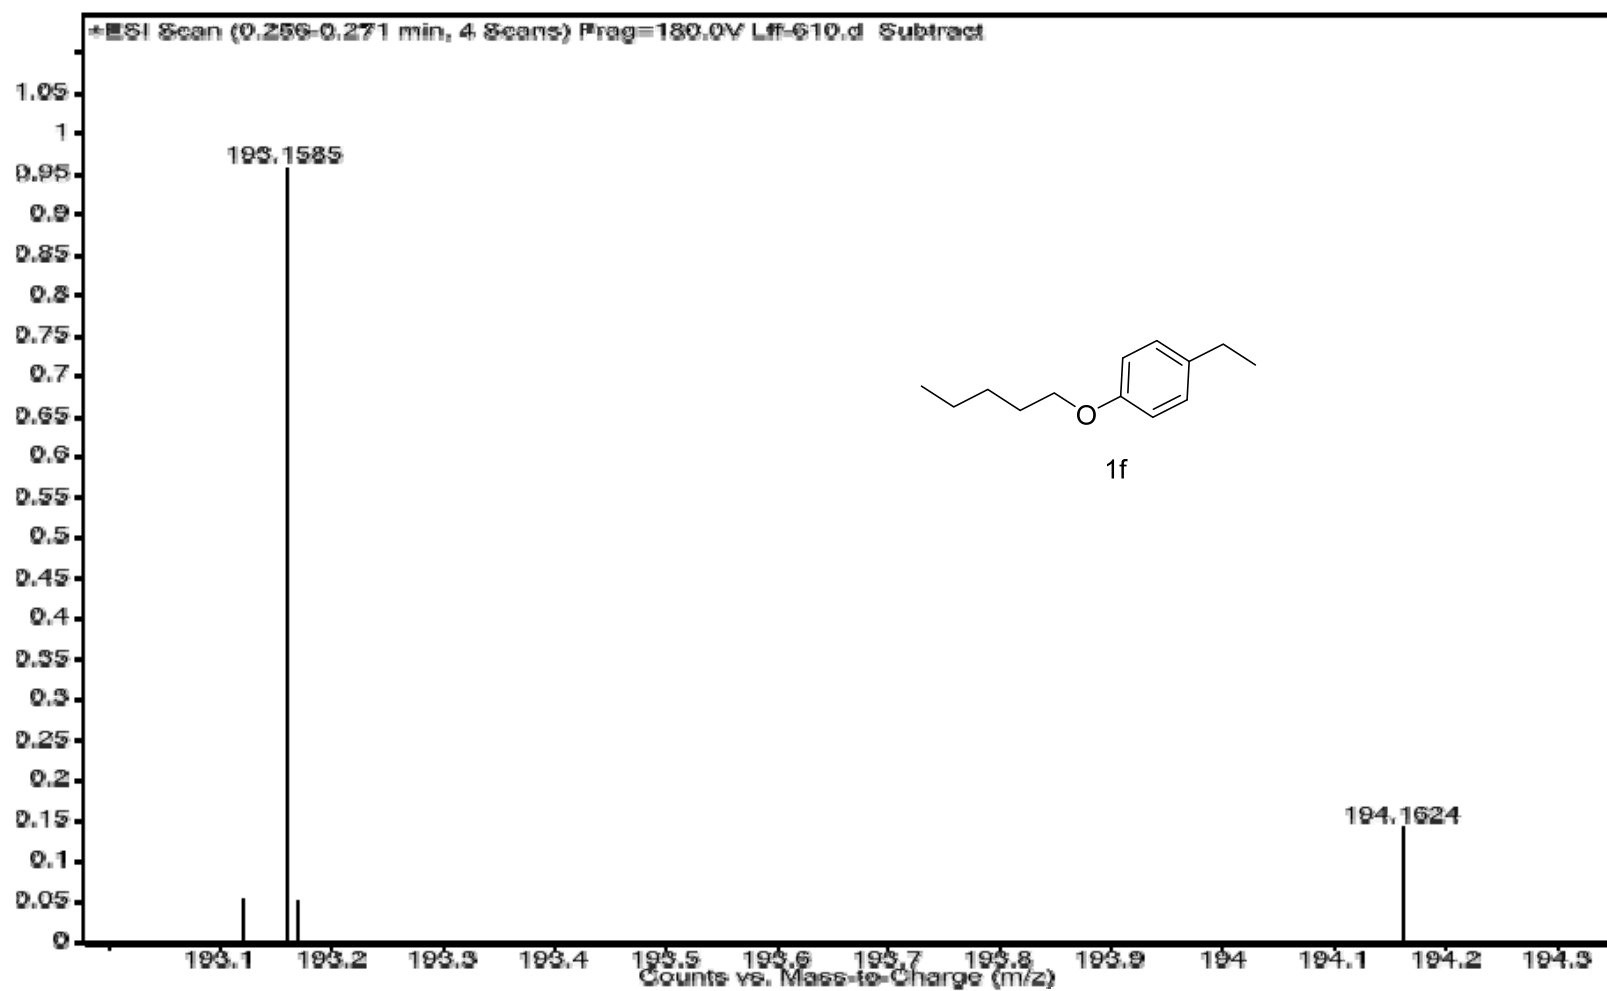

HRMS spectrum of compound 1f

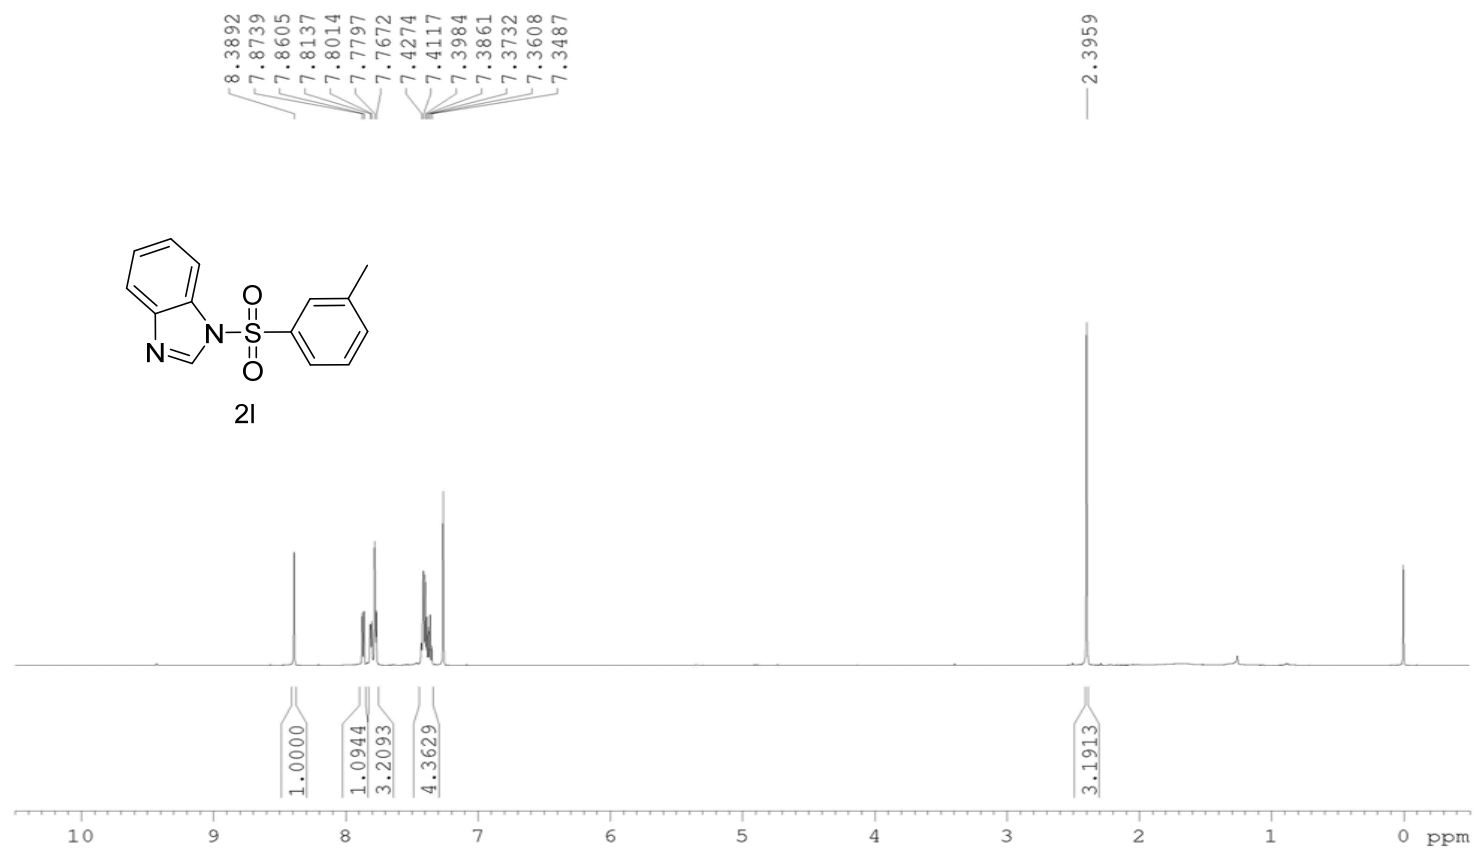

<sup>1</sup>H NMR spectrum of compound 2l in CDCl<sub>3</sub> (600 MHz)

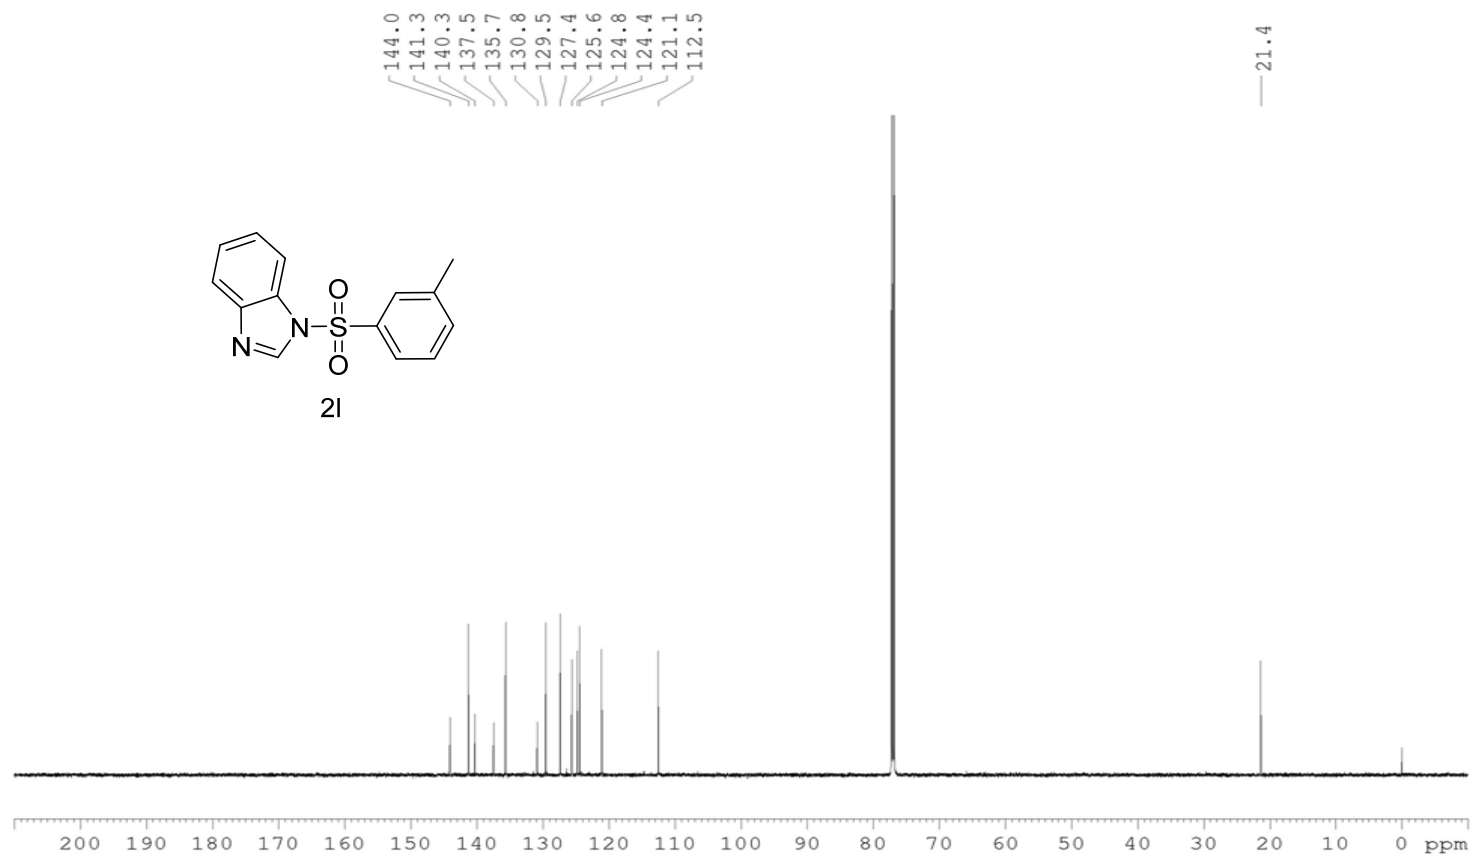

<sup>13</sup>C NMR spectrum of compound 2l in CDCl<sub>3</sub> (150 MHz)

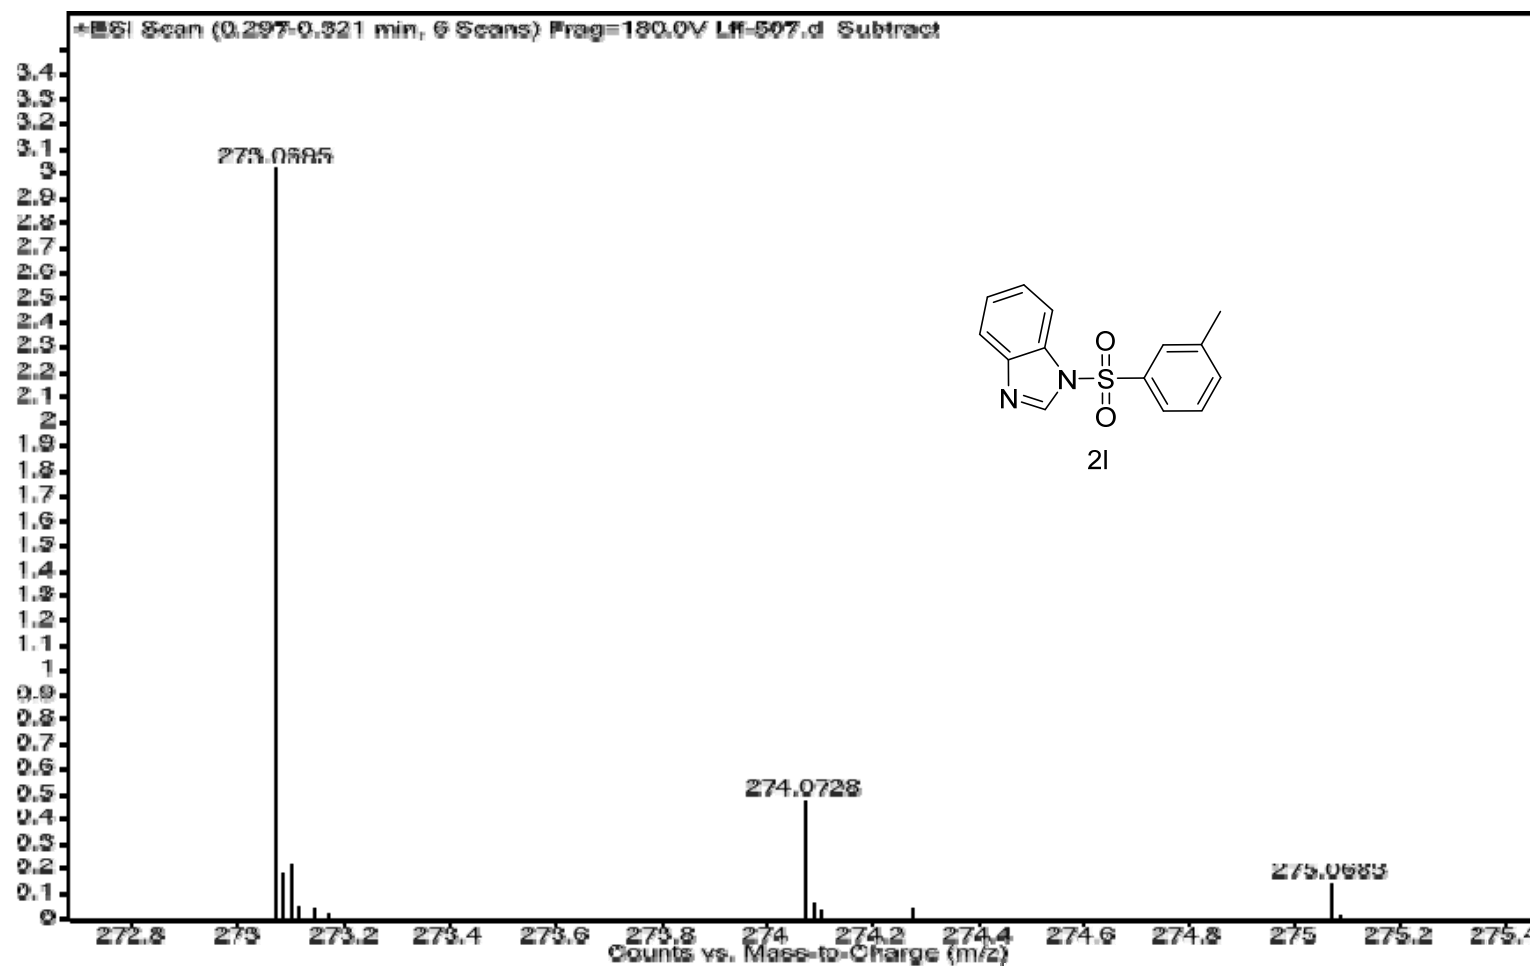

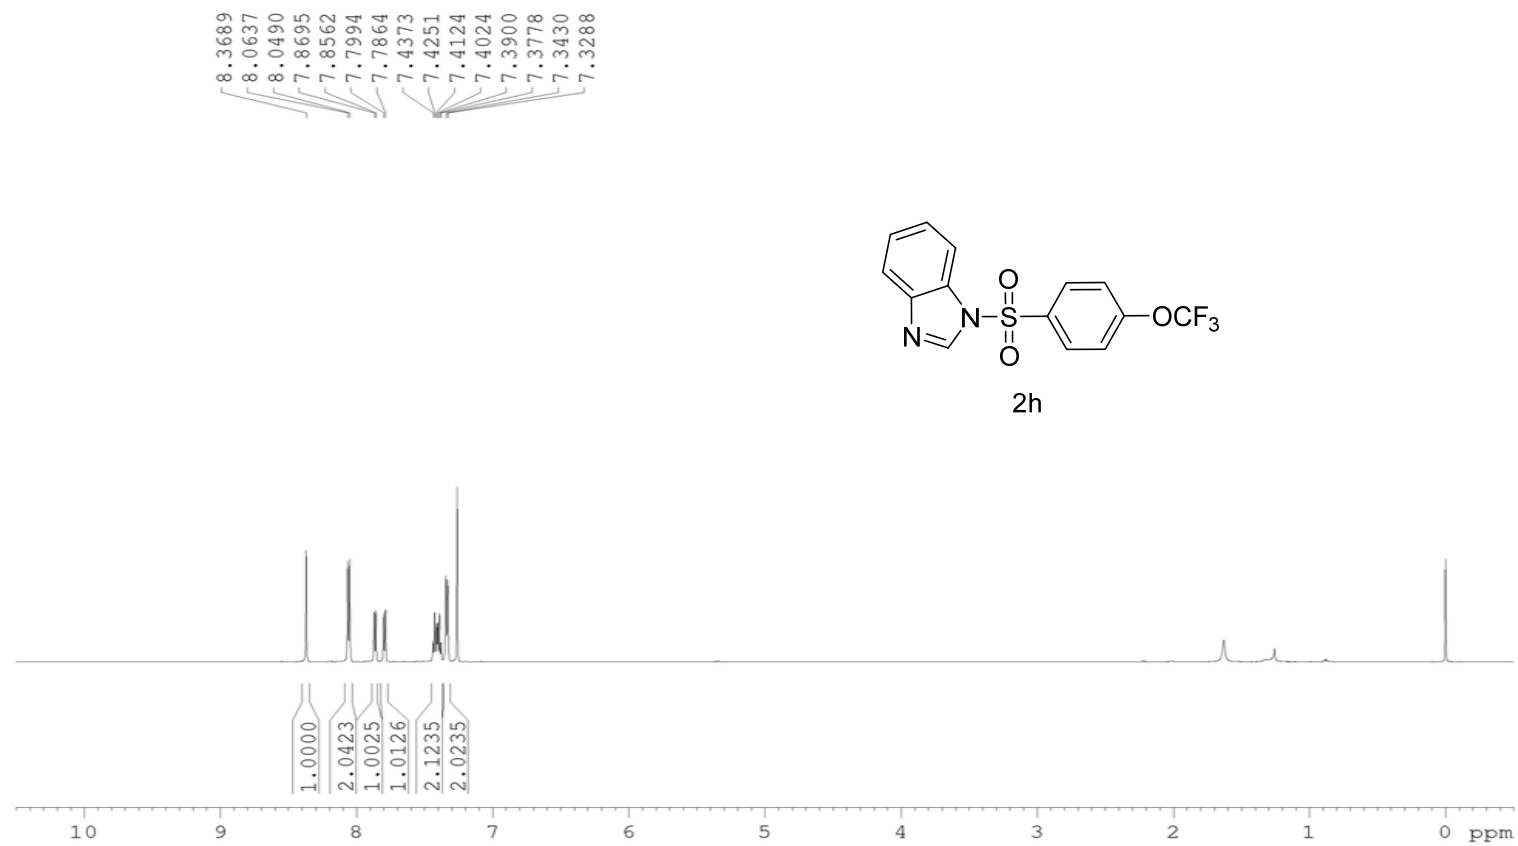

**<sup>1</sup>H NMR spectrum of compound 2h in CDCl<sub>3</sub> (600 MHz)**

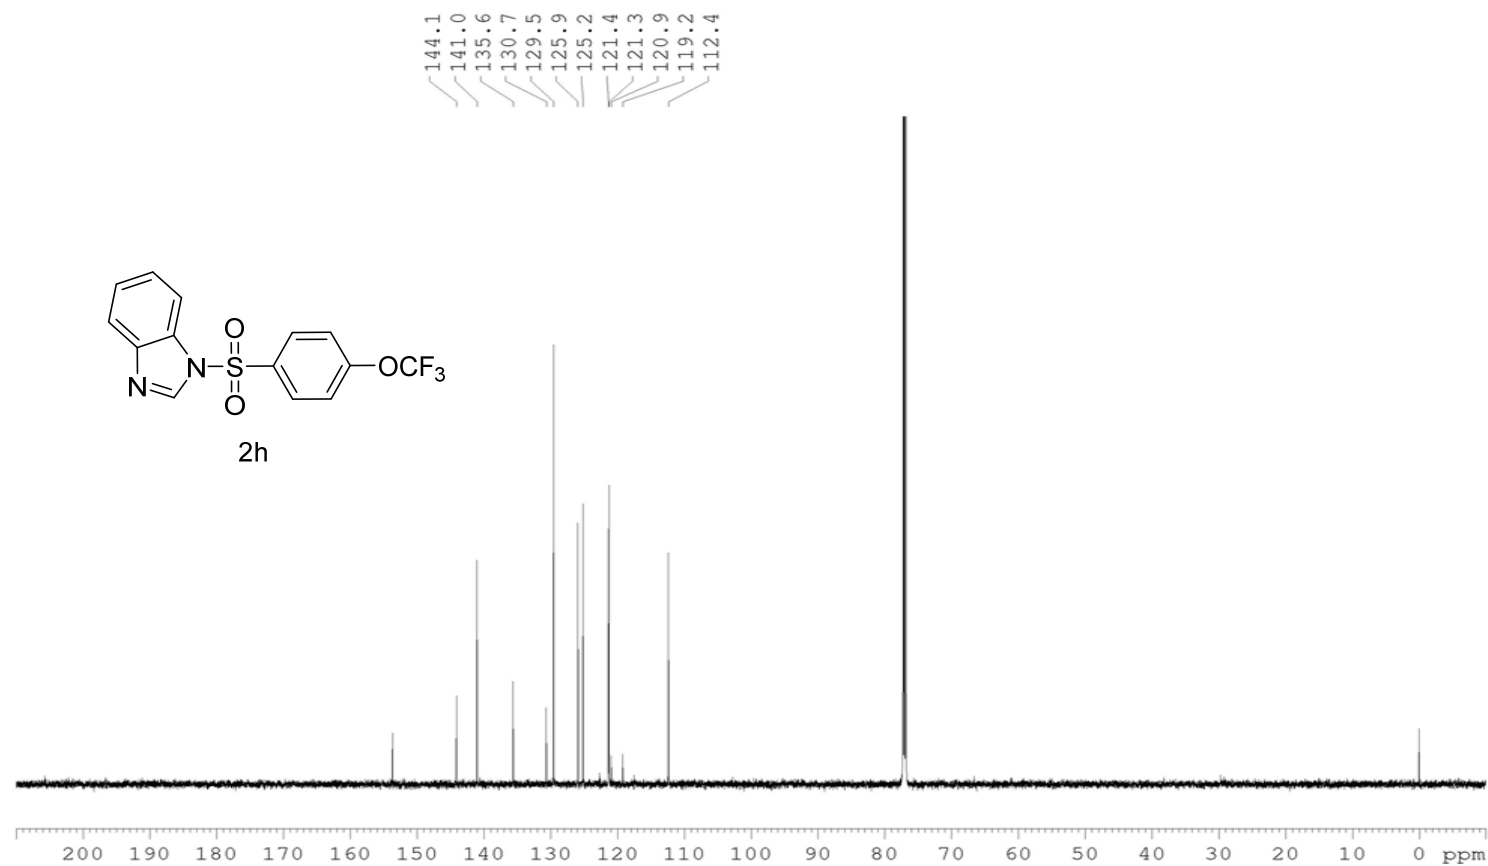

<sup>13</sup>C NMR spectrum of compound 2h in CDCl<sub>3</sub> (150 MHz)

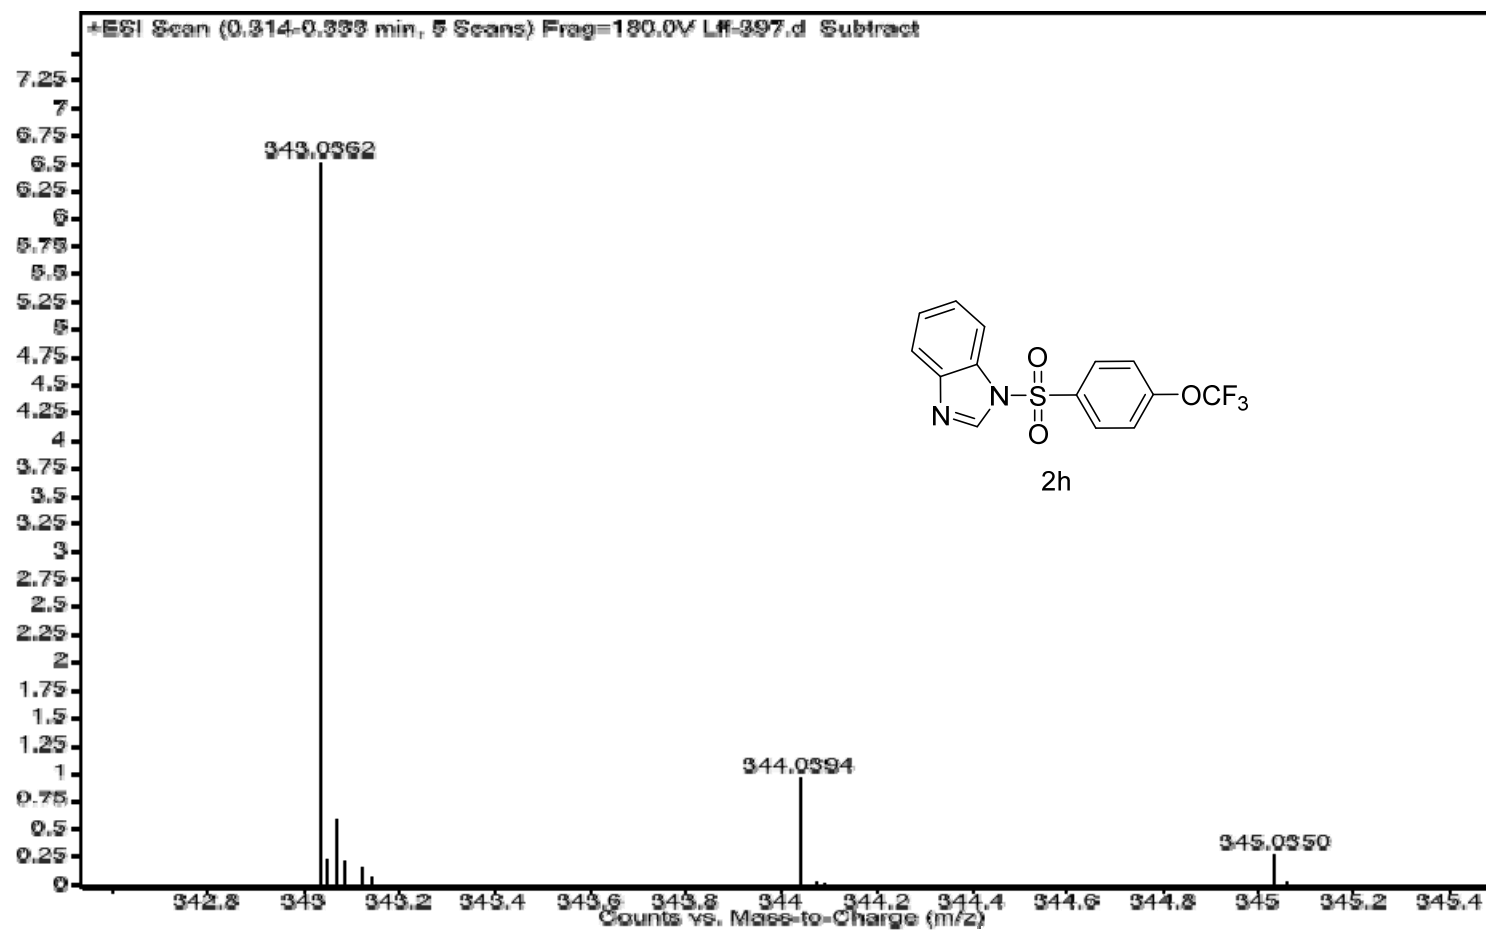

HRMS spectrum of compound 2h

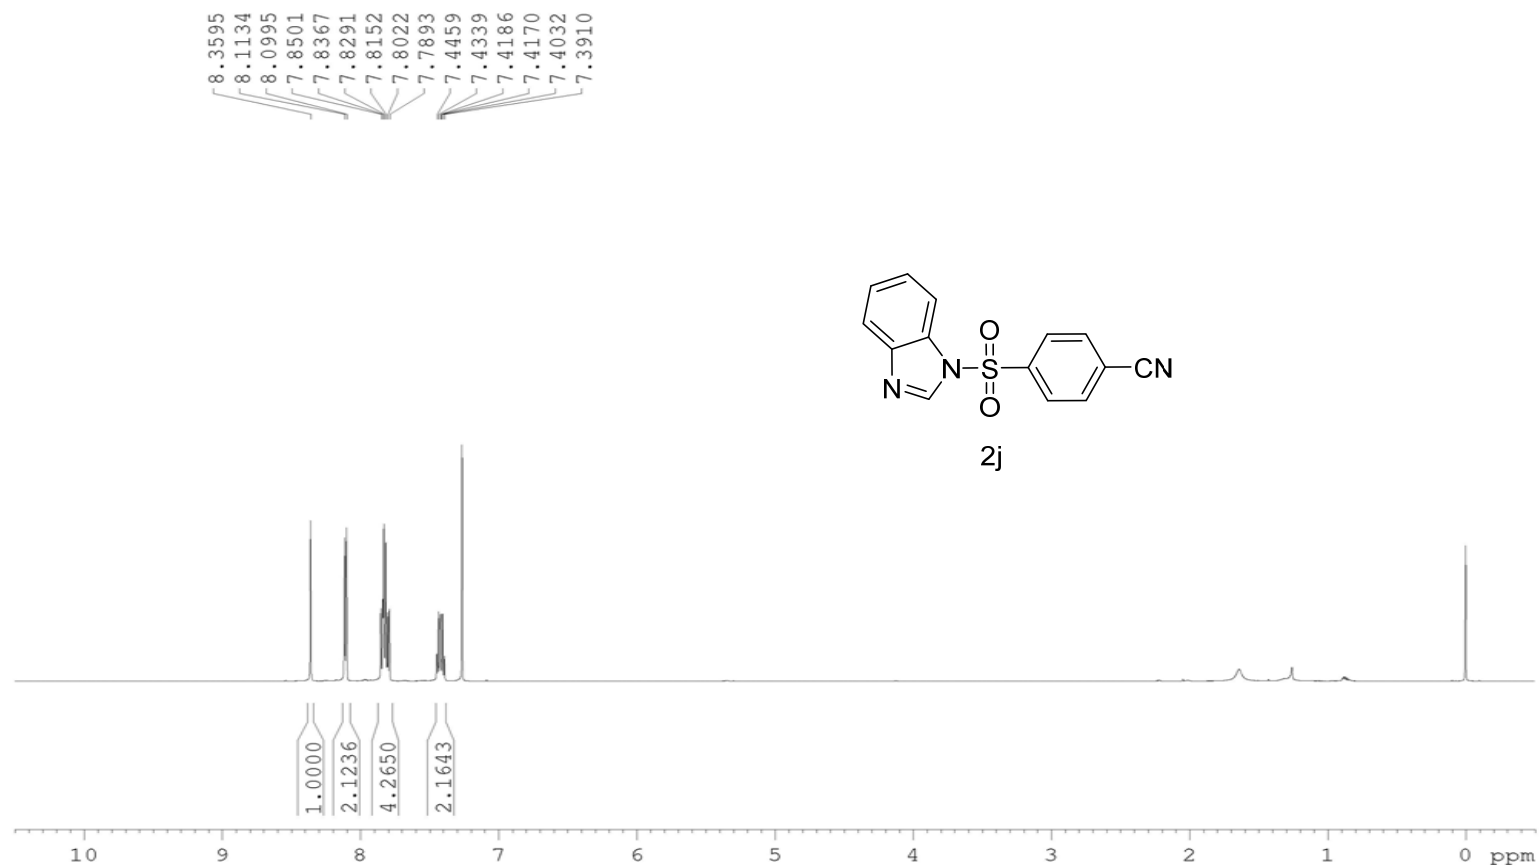

**<sup>1</sup>H NMR spectrum of compound 2j in CDCl<sub>3</sub> (600 MHz)**



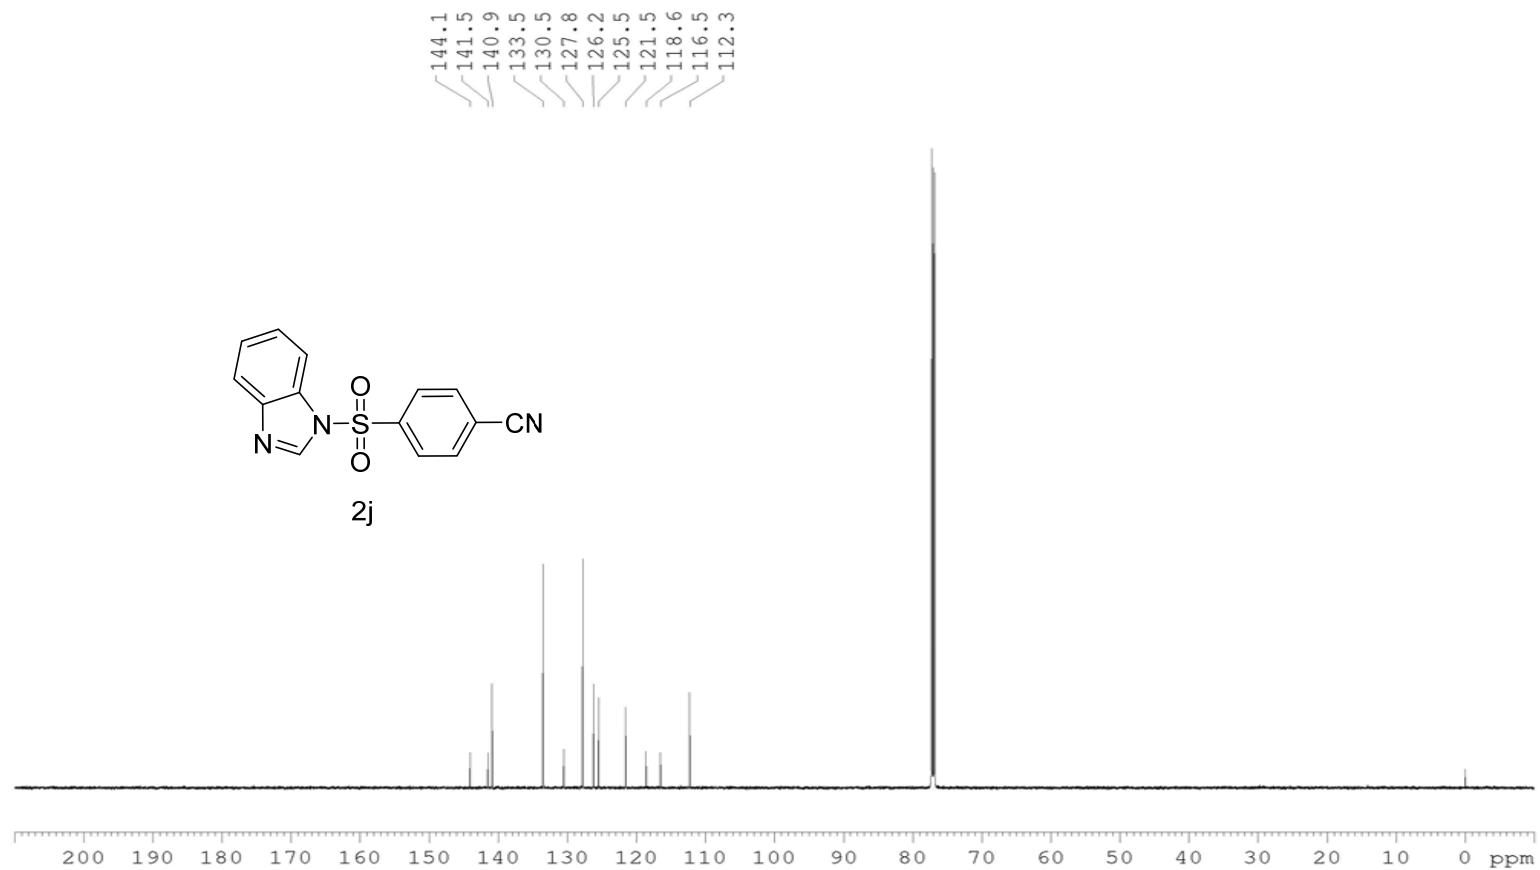

**<sup>13</sup>C NMR spectrum of compound 2j in CDCl<sub>3</sub> (150 MHz)**

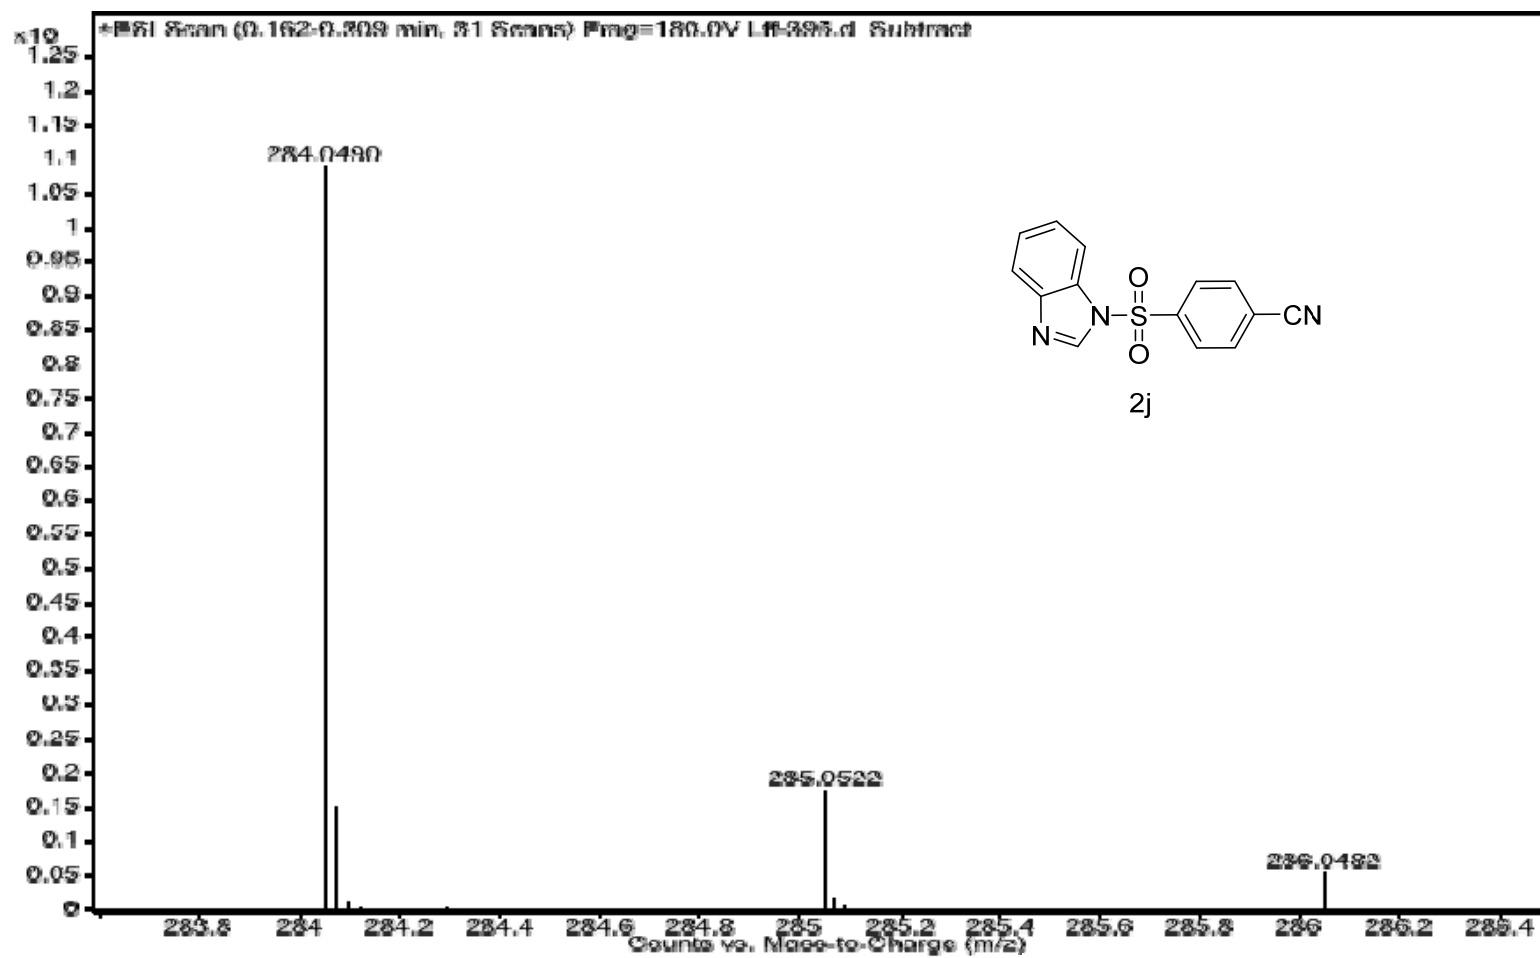

HRMS spectrum of compound 2j

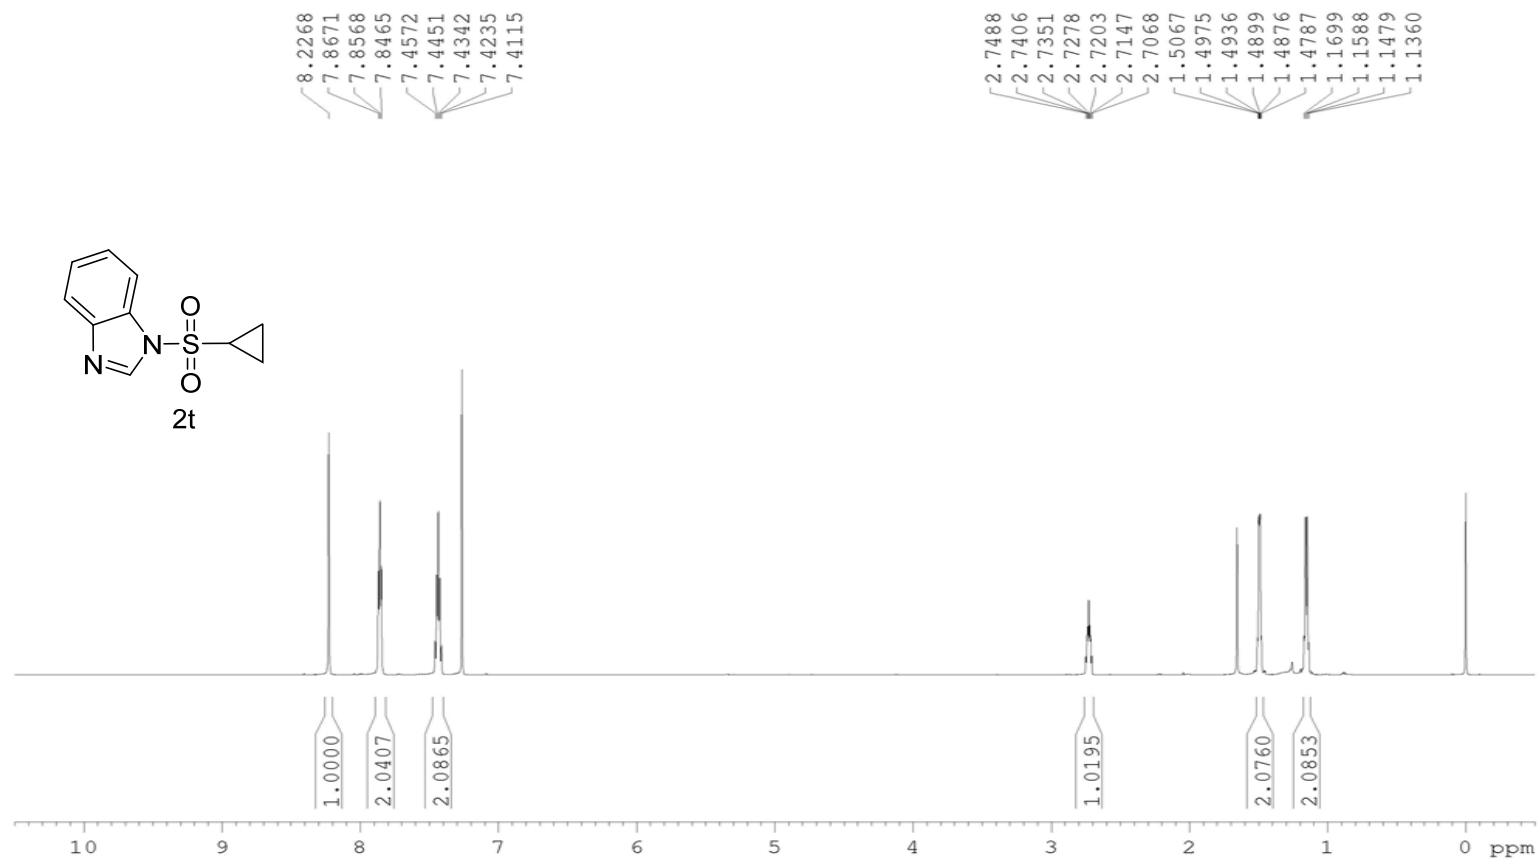

<sup>1</sup>H NMR spectrum of compound 2t in CDCl<sub>3</sub> (600 MHz)

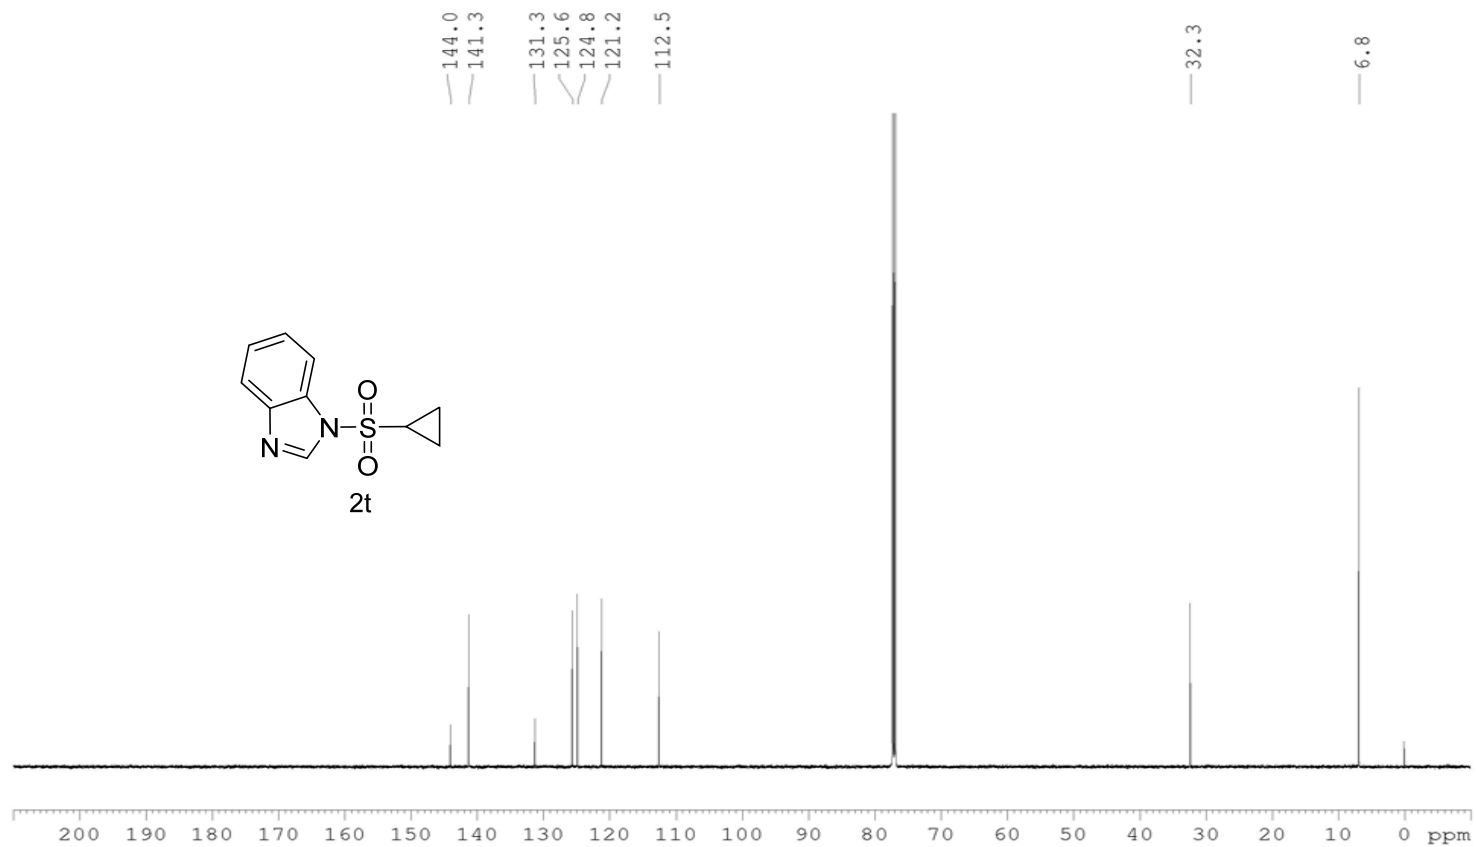

**<sup>13</sup>C NMR spectrum of compound 2t in CDCl<sub>3</sub> (150 MHz)**

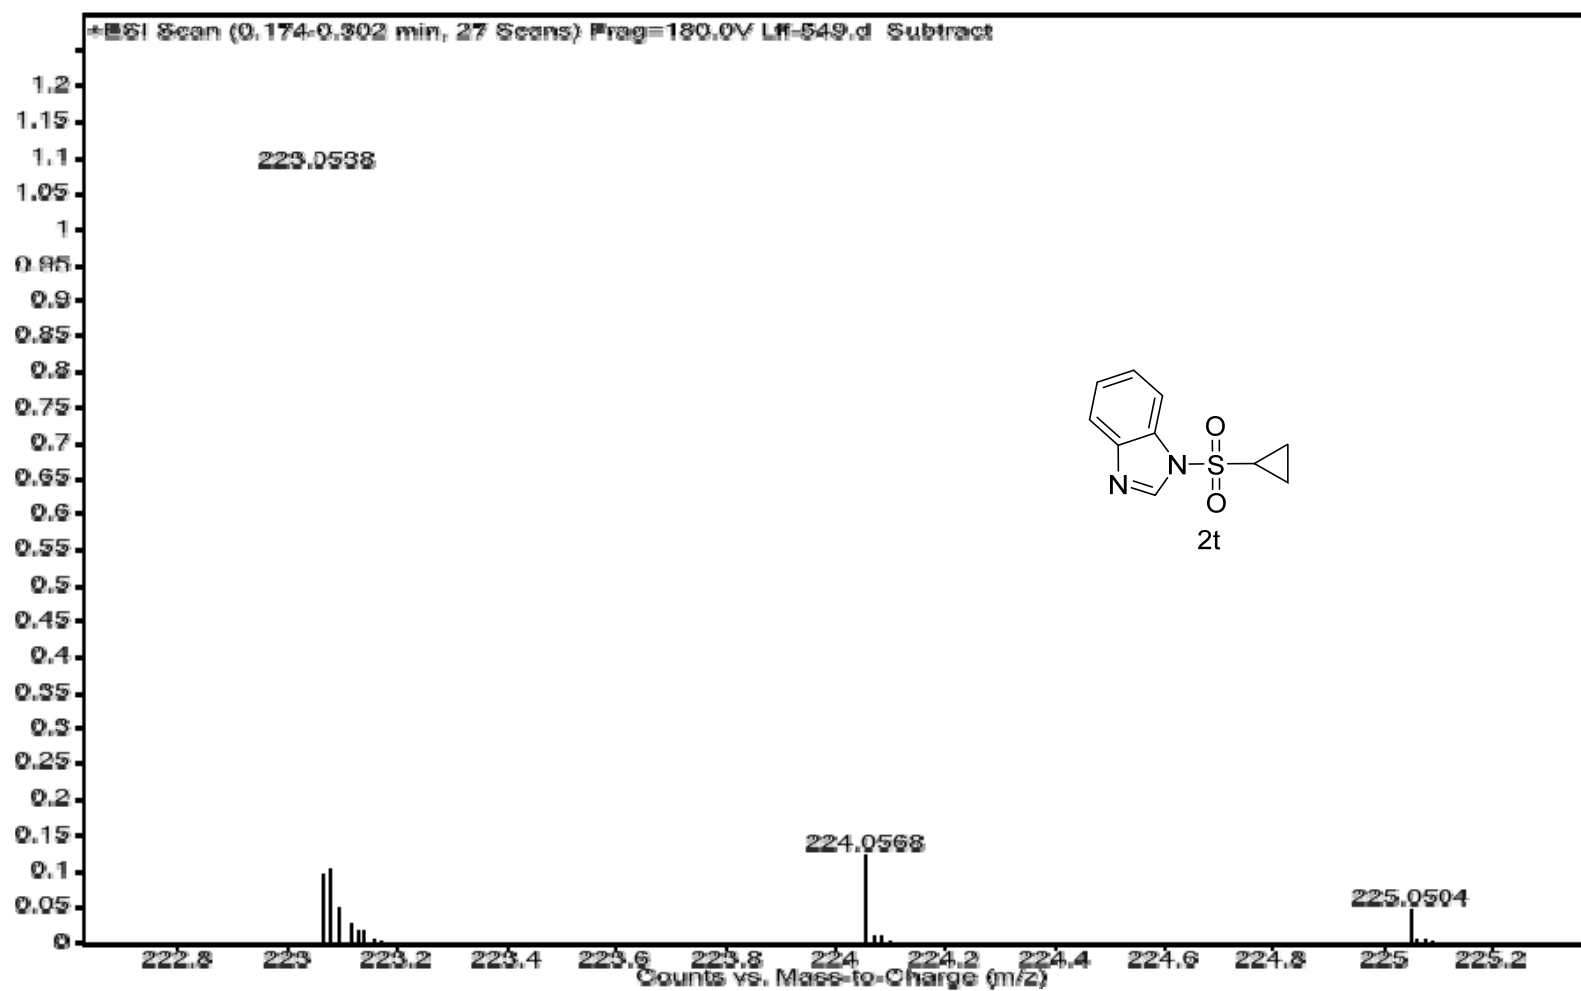

HRMS spectrum of compound 2t

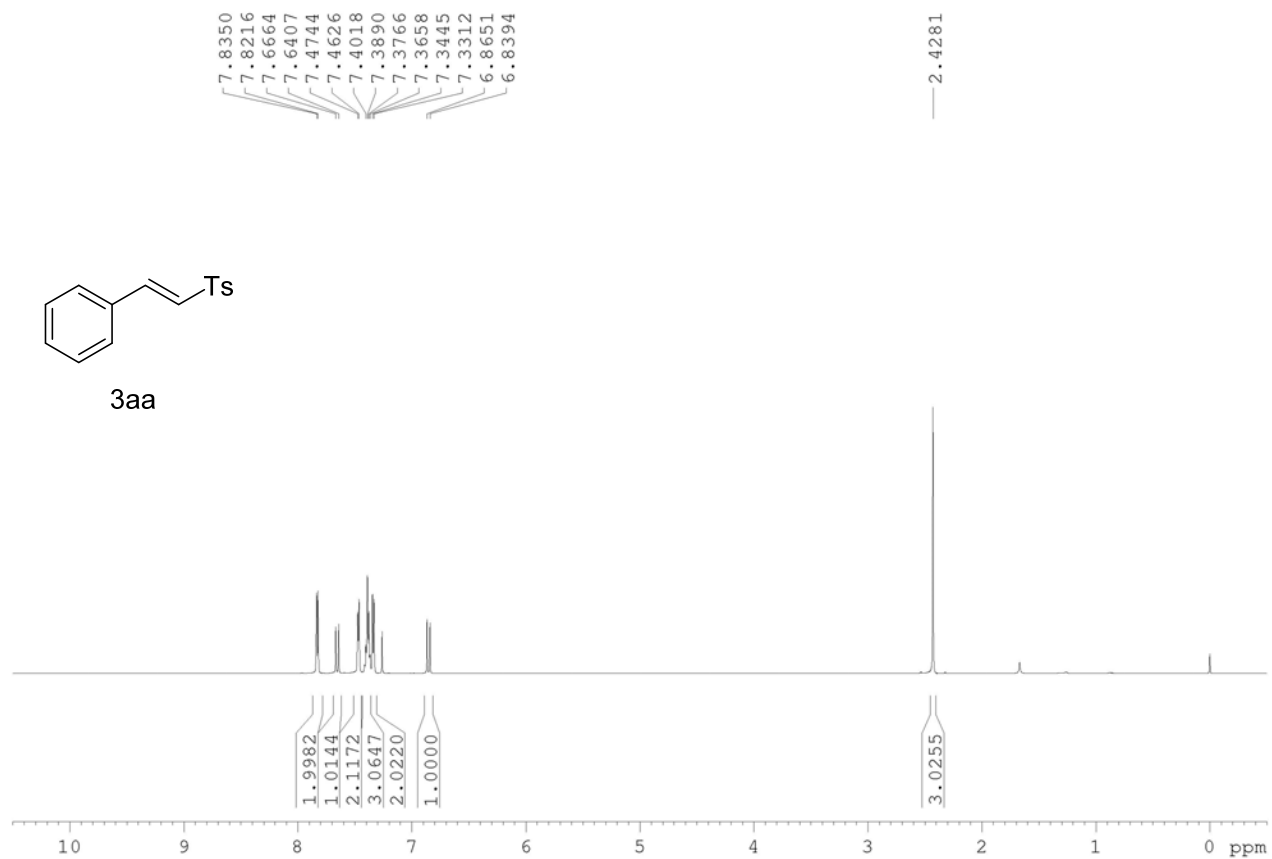

**<sup>1</sup>H NMR spectrum of compound 3aa in CDCl<sub>3</sub> (600 MHz)**



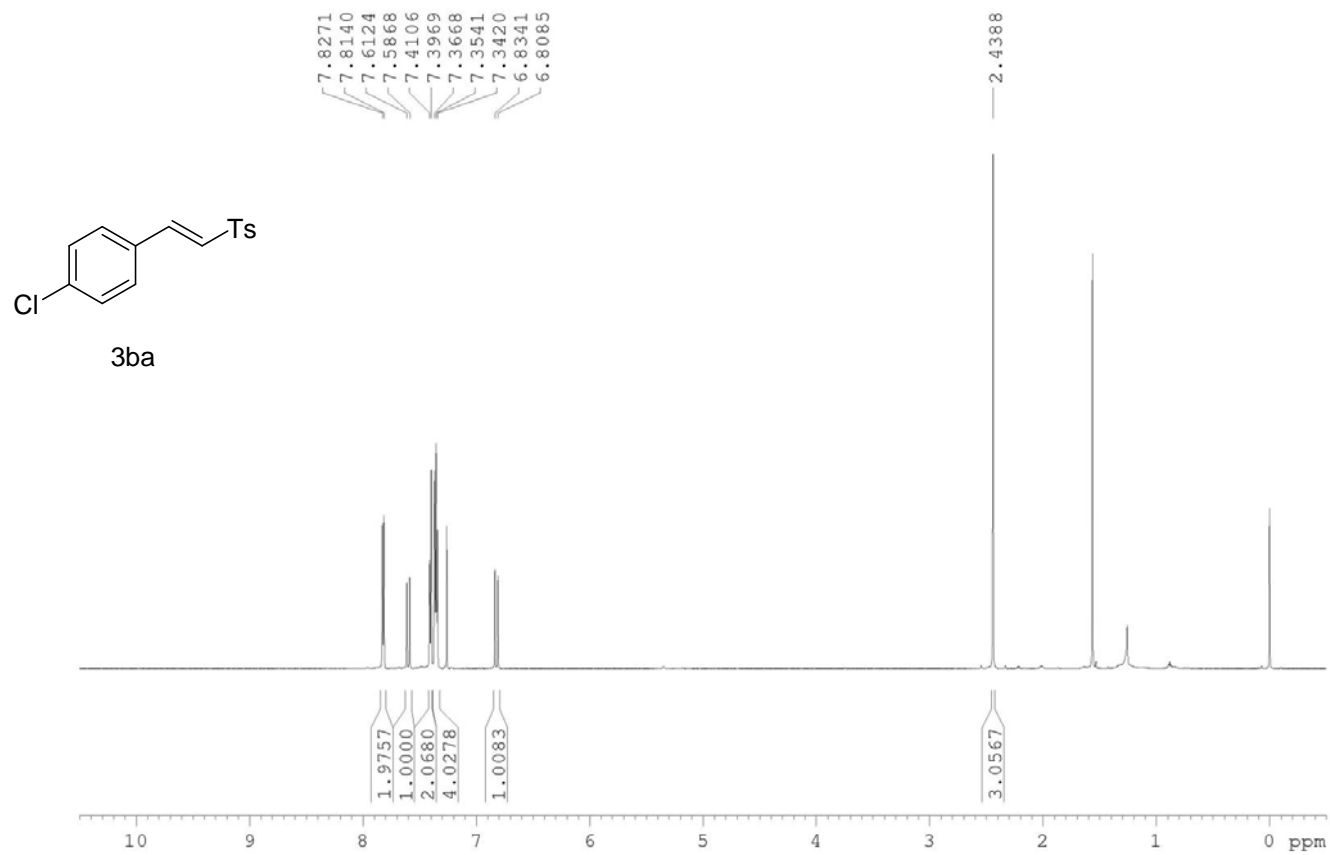

**<sup>1</sup>H NMR spectrum of compound 3ba in CDCl<sub>3</sub> (600 MHz)**



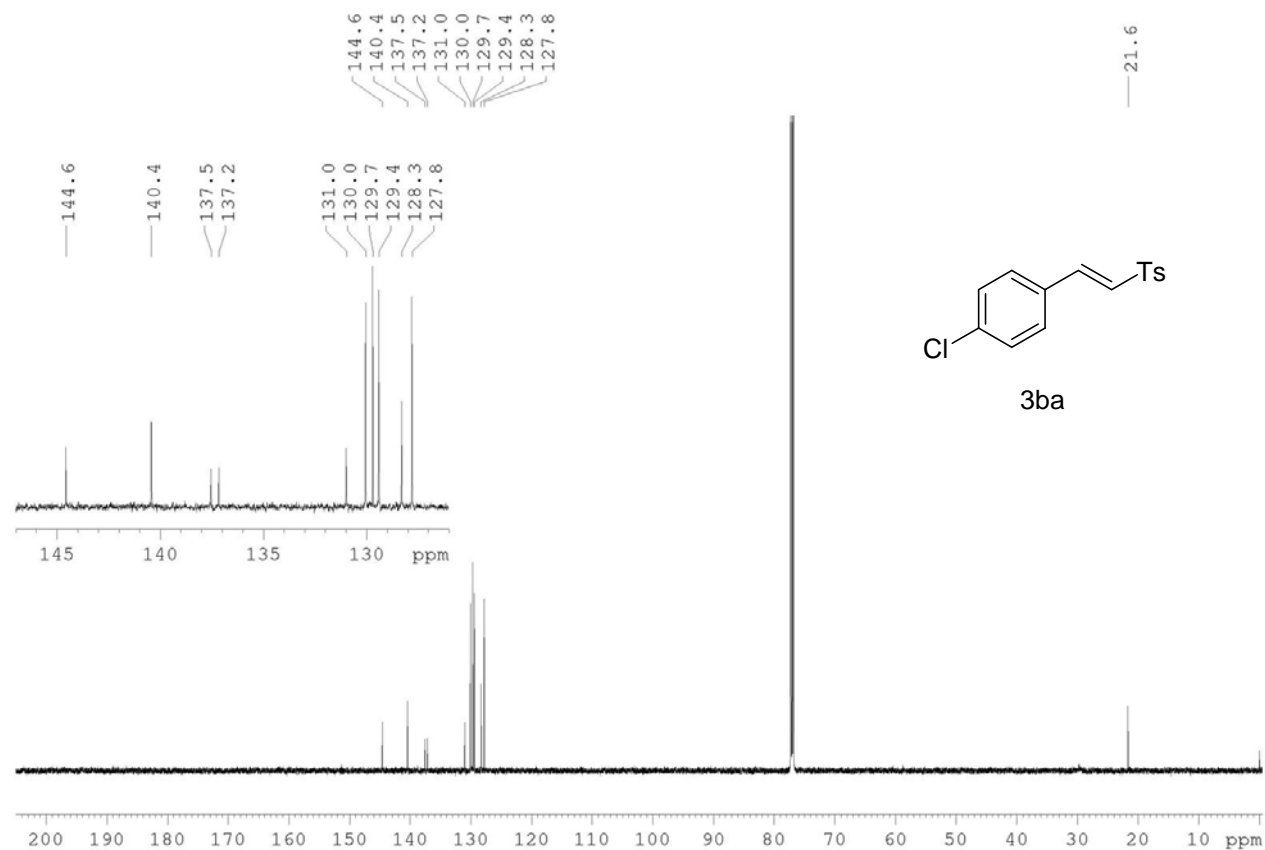

$^{13}\text{C}$  NMR spectrum of compound 3ba in  $\text{CDCl}_3$  (150 MHz)

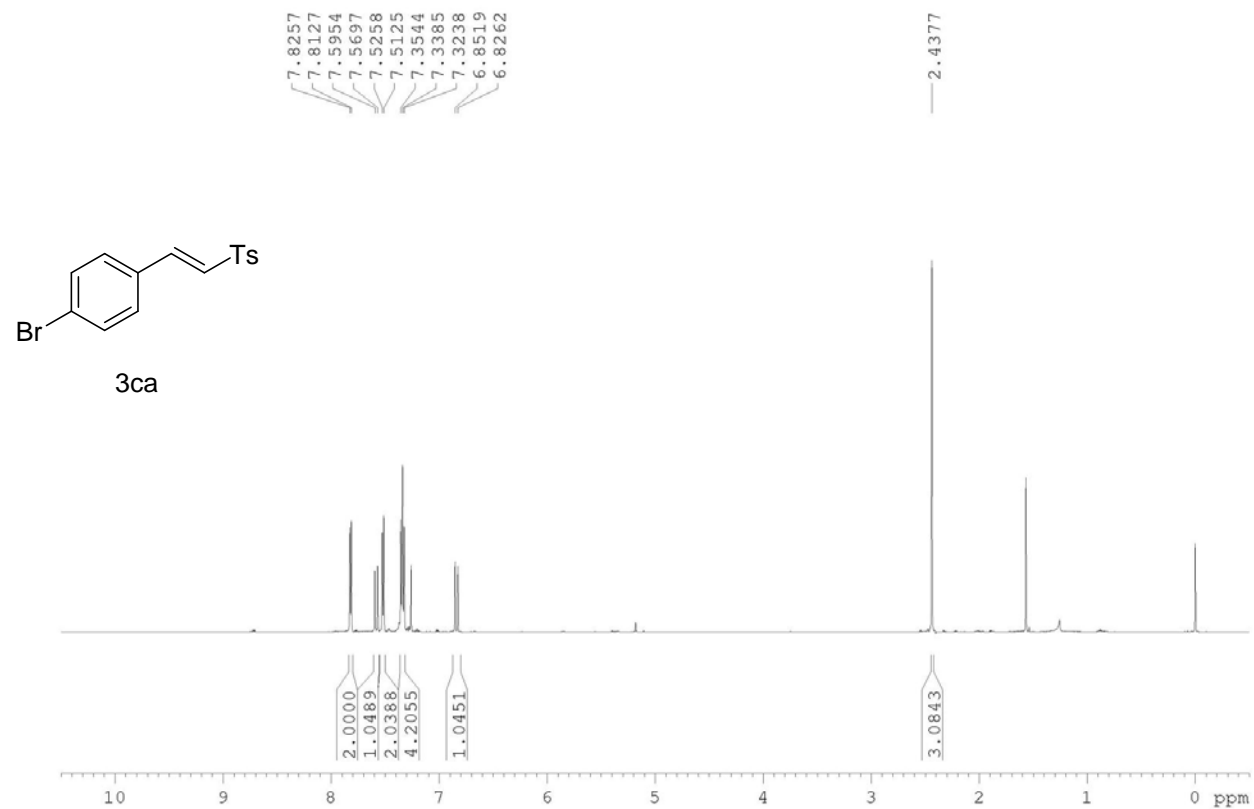

**<sup>1</sup>H NMR spectrum of compound 3ca in CDCl<sub>3</sub> (600 MHz)**

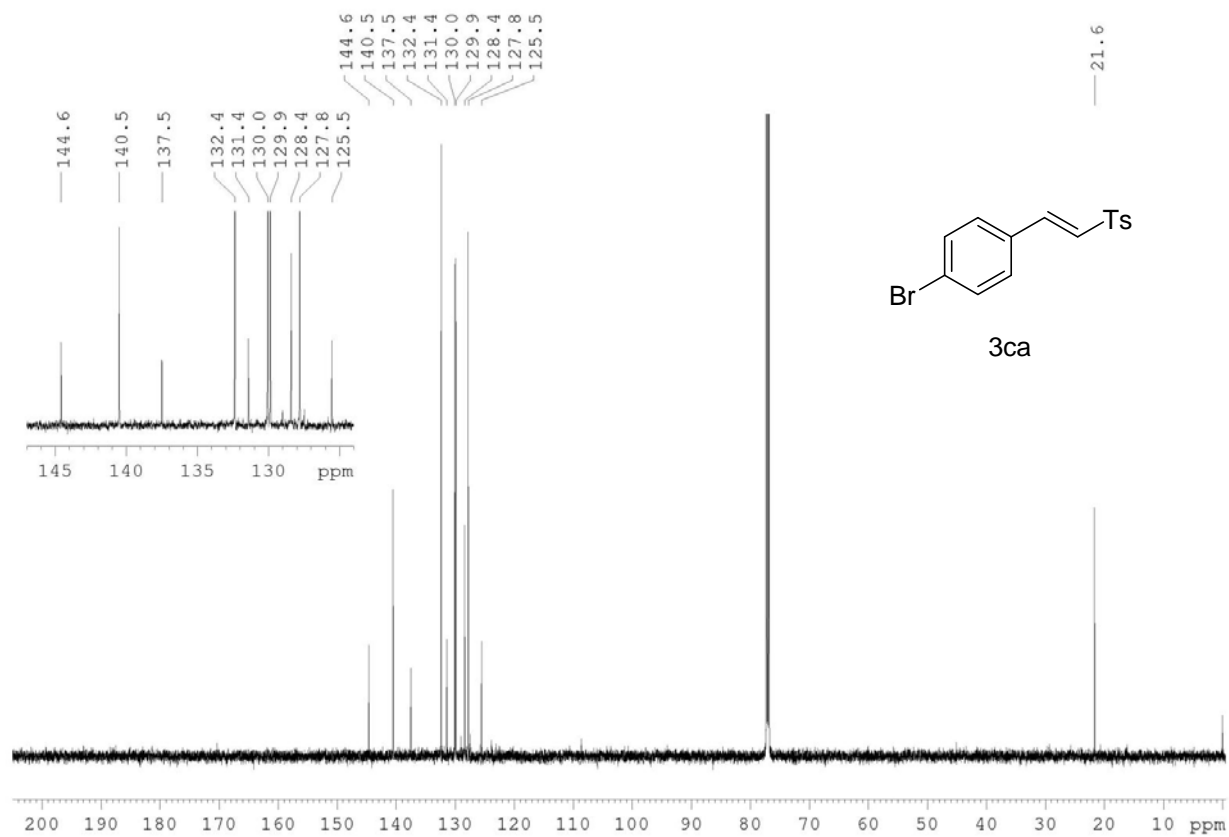

<sup>13</sup>C NMR spectrum of compound 3ca in CDCl<sub>3</sub> (150 MHz)

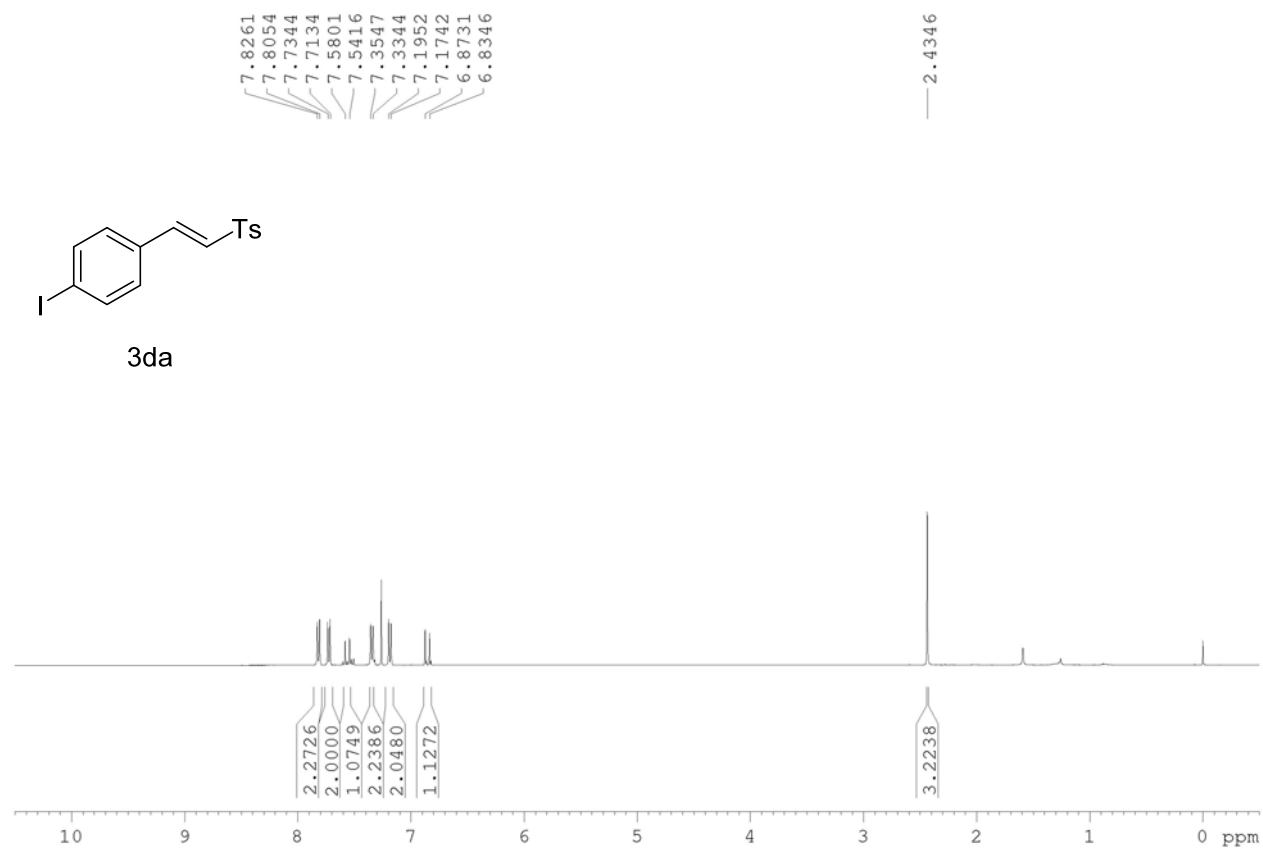

$^1\text{H}$  NMR spectrum of compound 3da in  $\text{CDCl}_3$  (600 MHz)

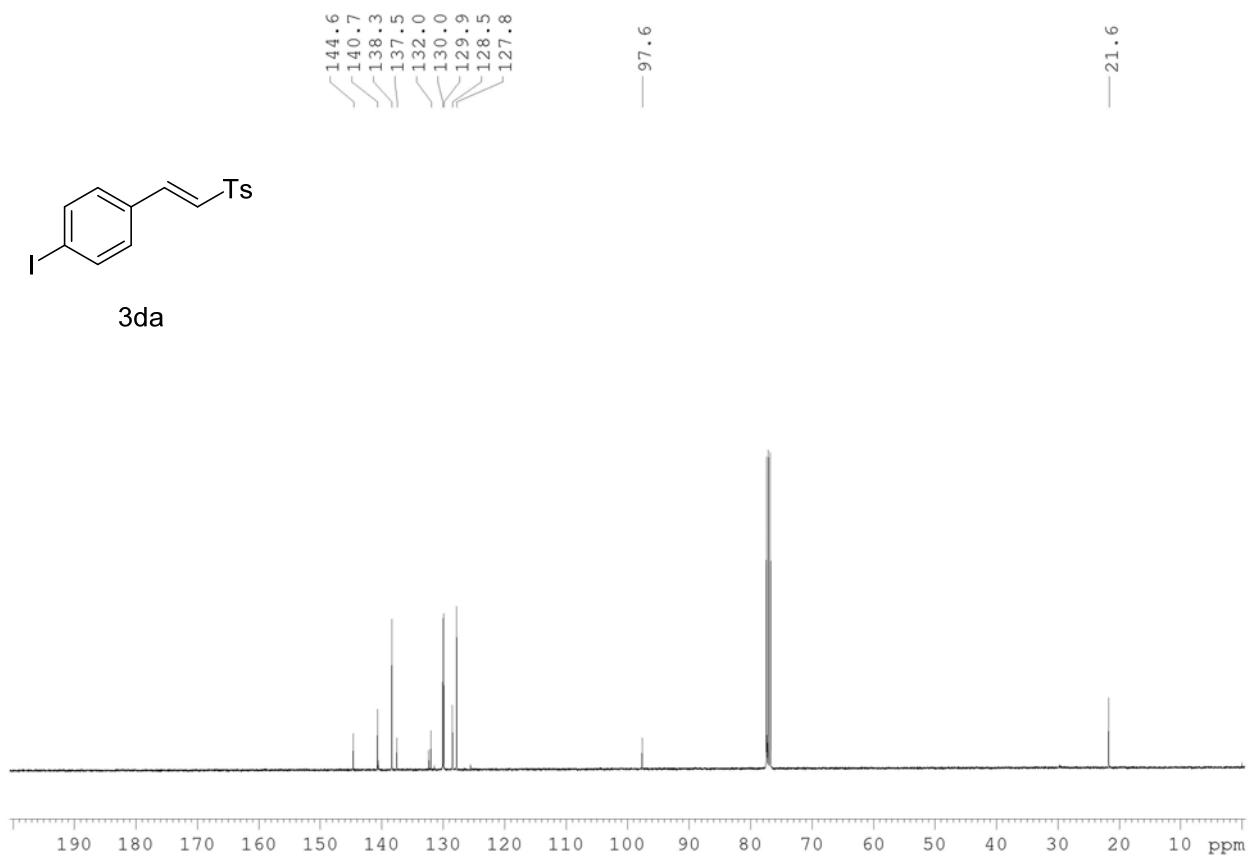

**$^{13}\text{C}$  NMR spectrum of compound 3da in  $\text{CDCl}_3$  (150 MHz)**

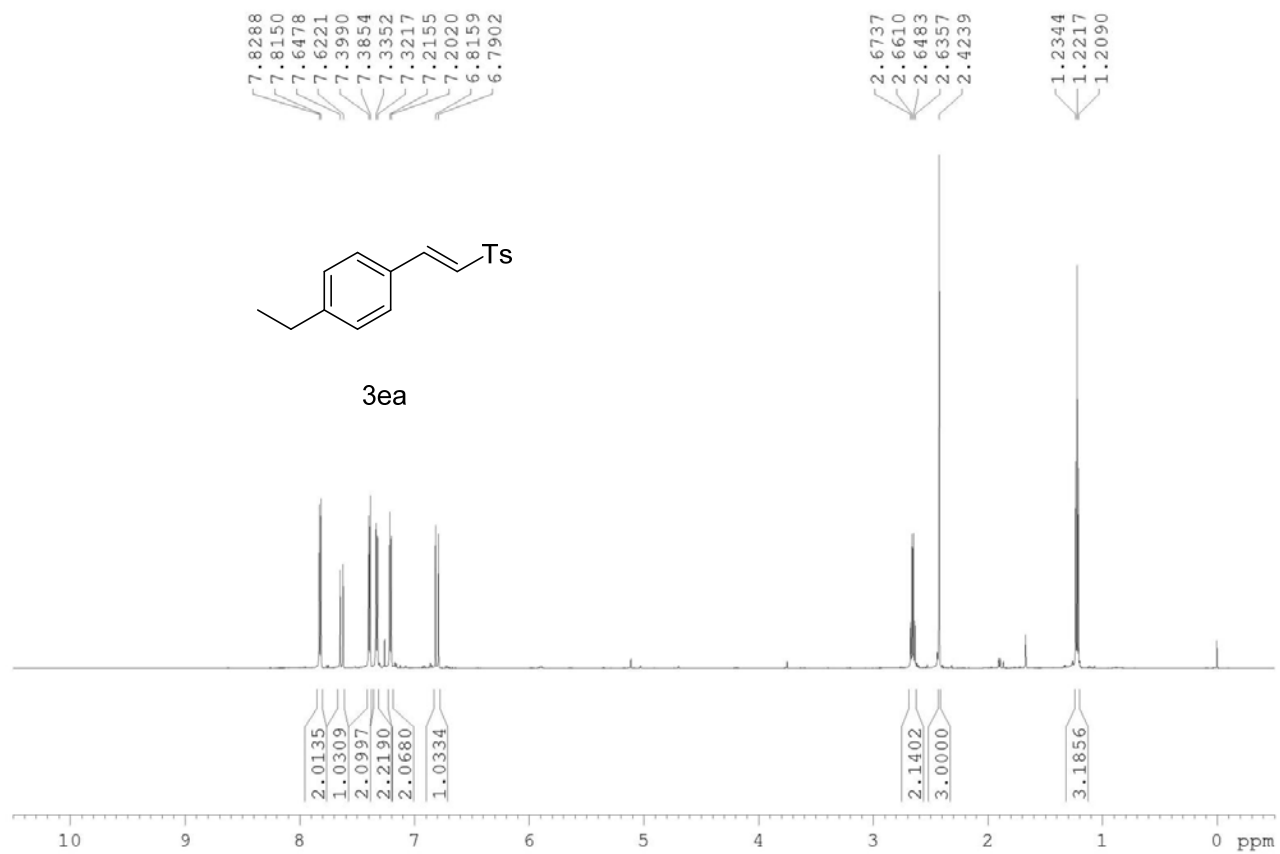

<sup>1</sup>H NMR spectrum of compound 3ea in CDCl<sub>3</sub> (600 MHz)

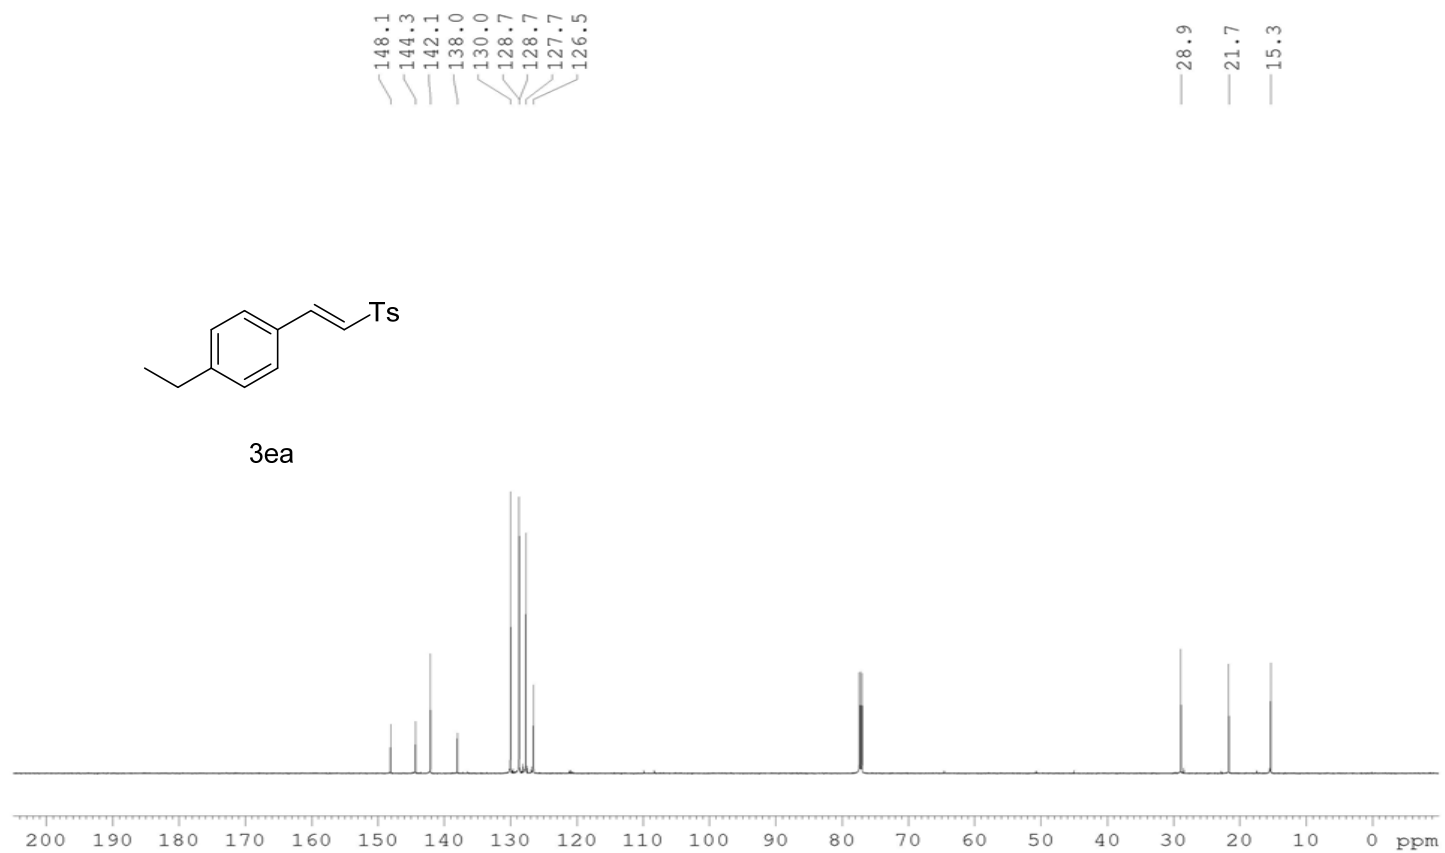

**<sup>13</sup>C NMR spectrum of compound 3ea in CDCl<sub>3</sub> (150 MHz)**

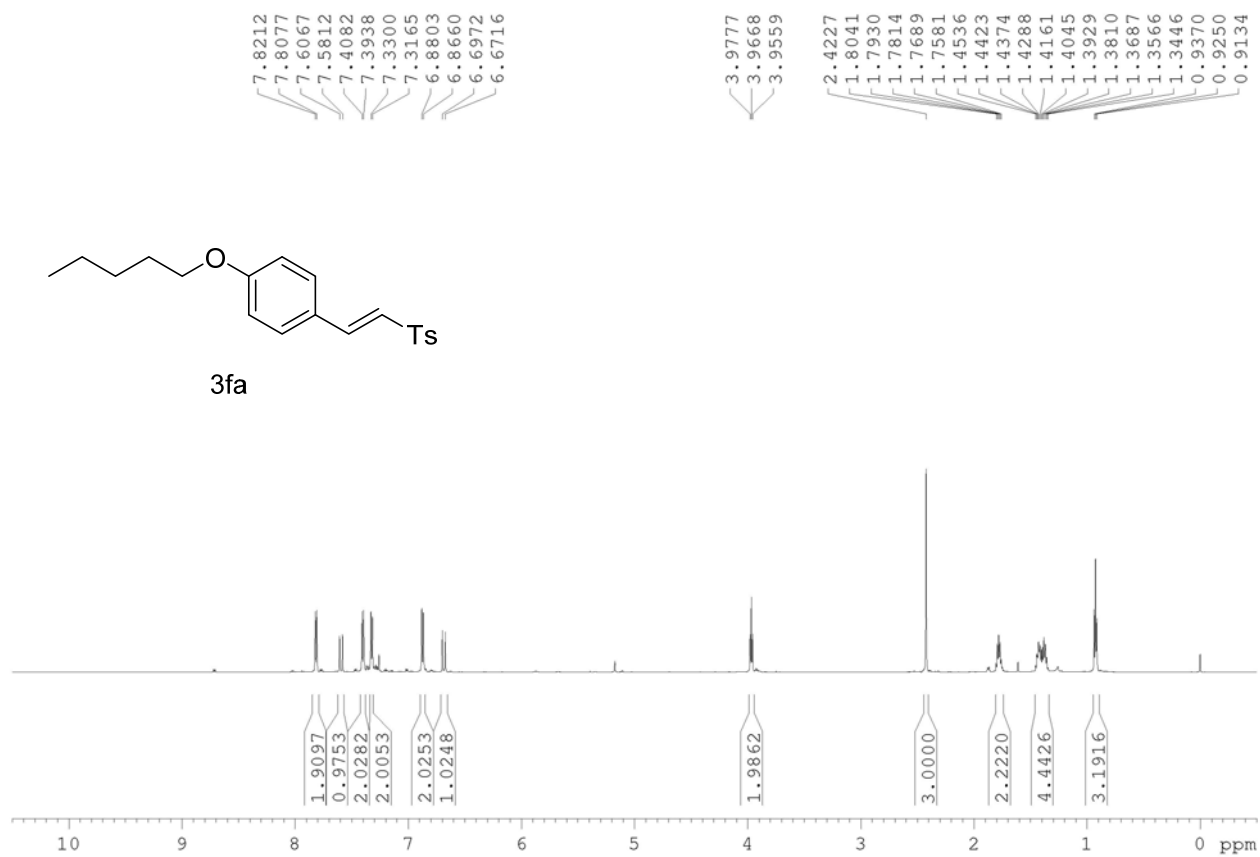



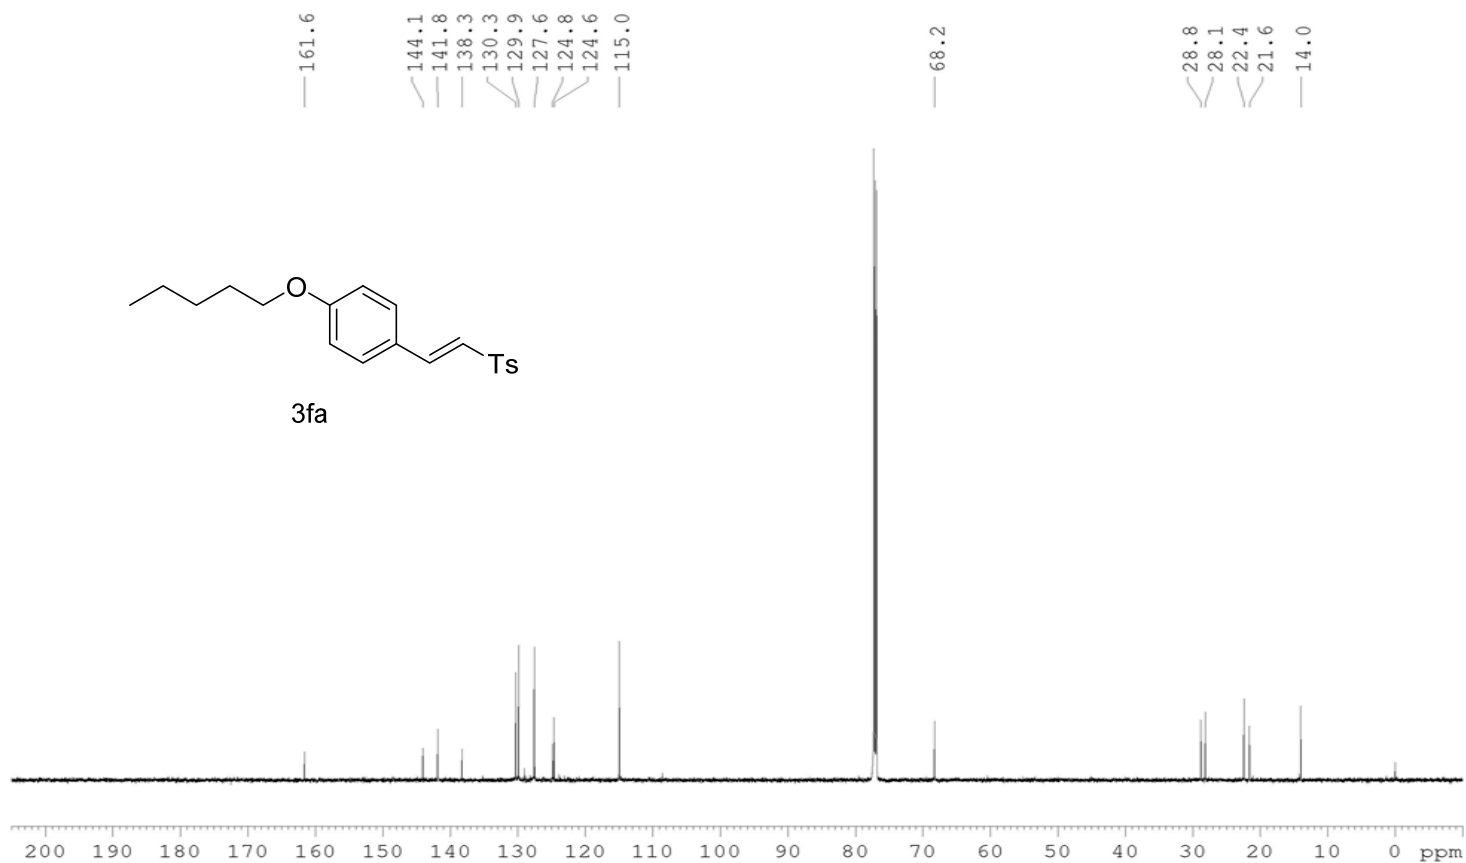

**<sup>13</sup>C NMR spectrum of compound 3fa in CDCl<sub>3</sub> (150 MHz)**

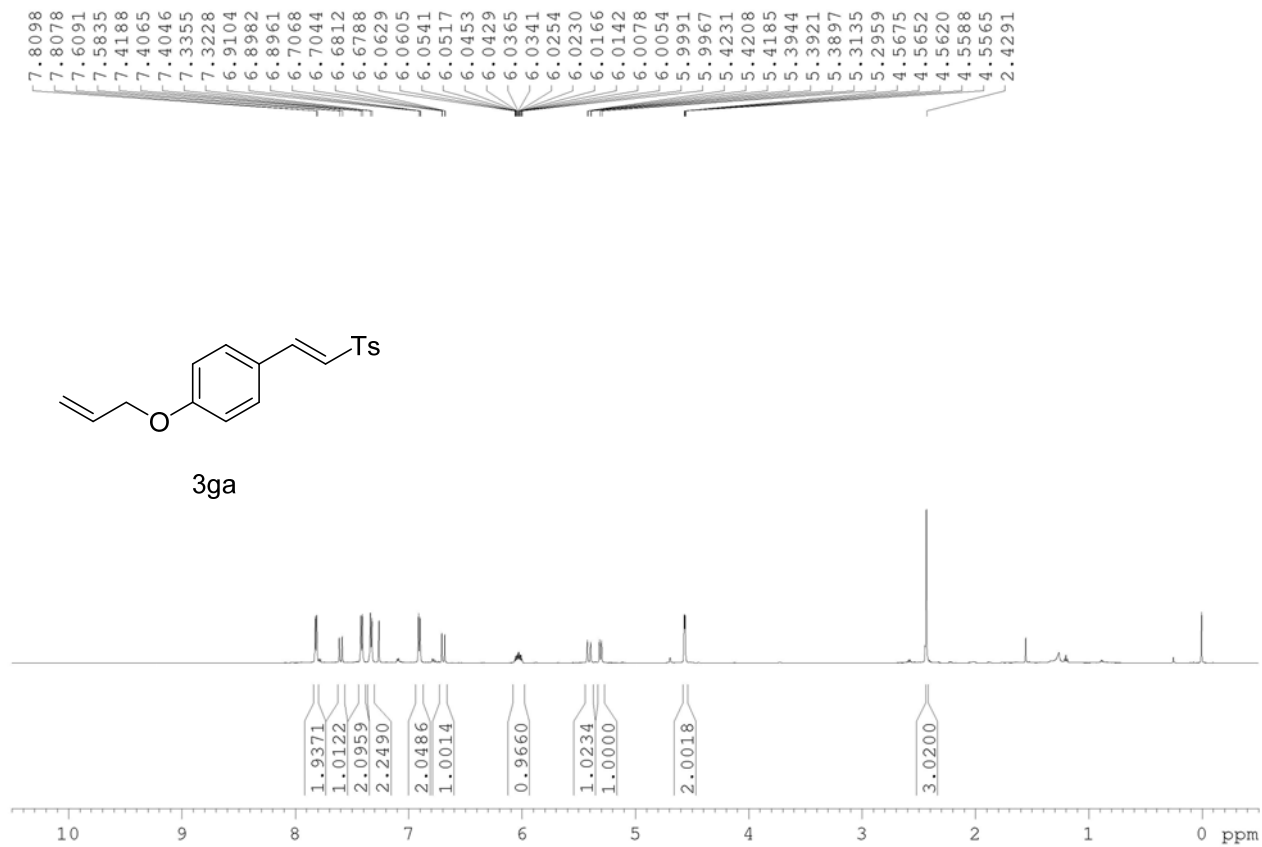

**<sup>1</sup>H NMR spectrum of compound 3ga in CDCl<sub>3</sub> (600 MHz)**

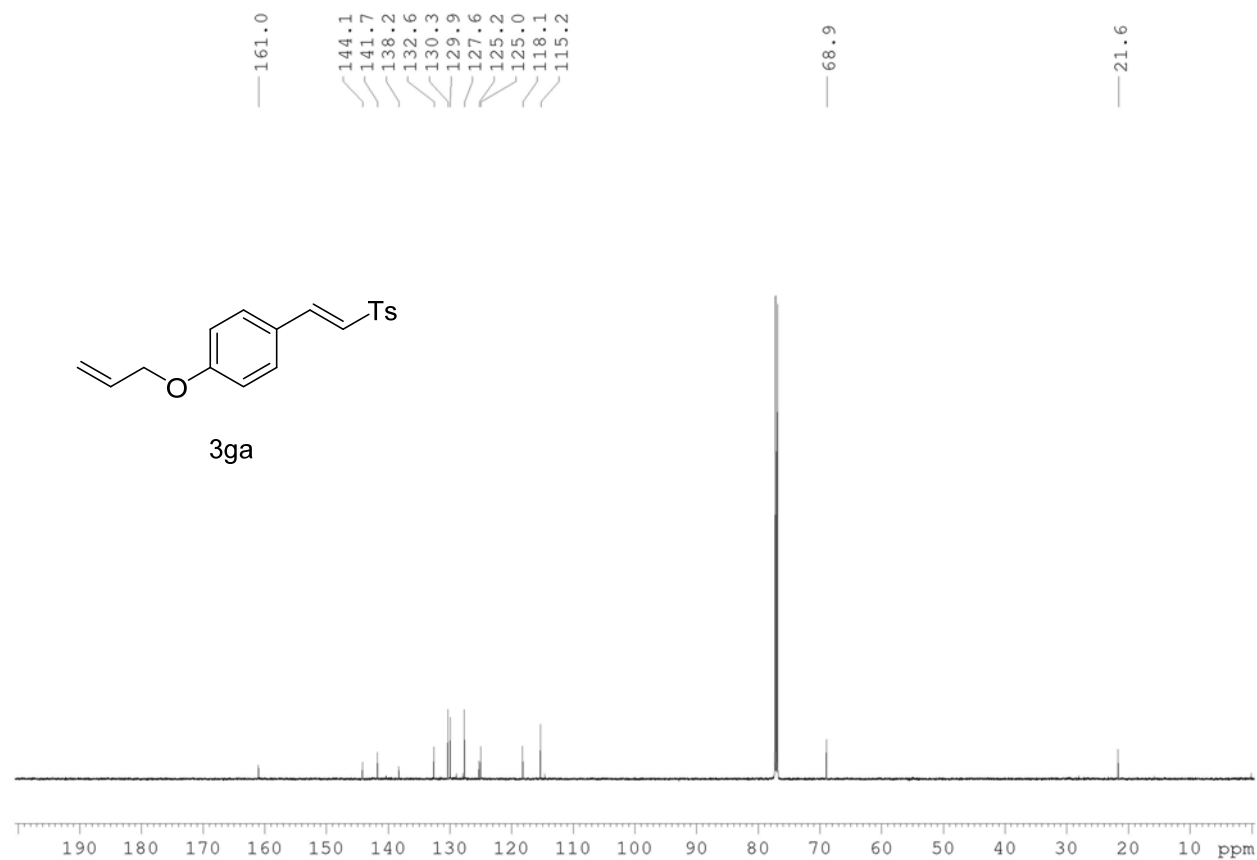

$^{13}\text{C}$  NMR spectrum of compound 3ga in  $\text{CDCl}_3$  (150 MHz)

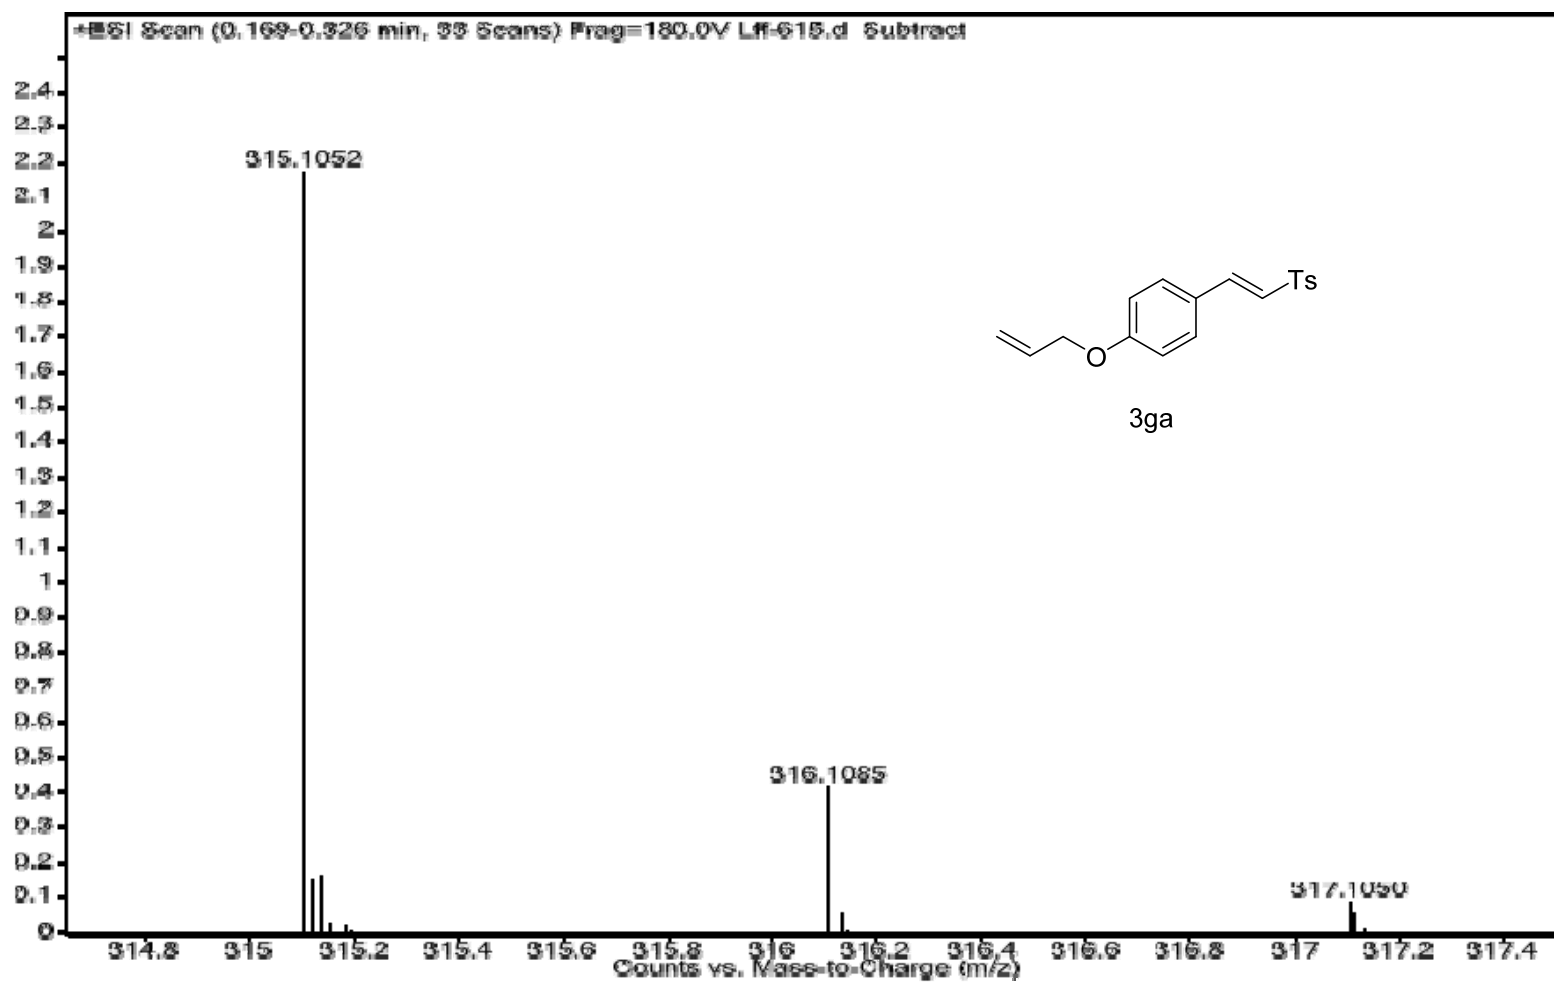

HRMS spectrum of compound 3ga

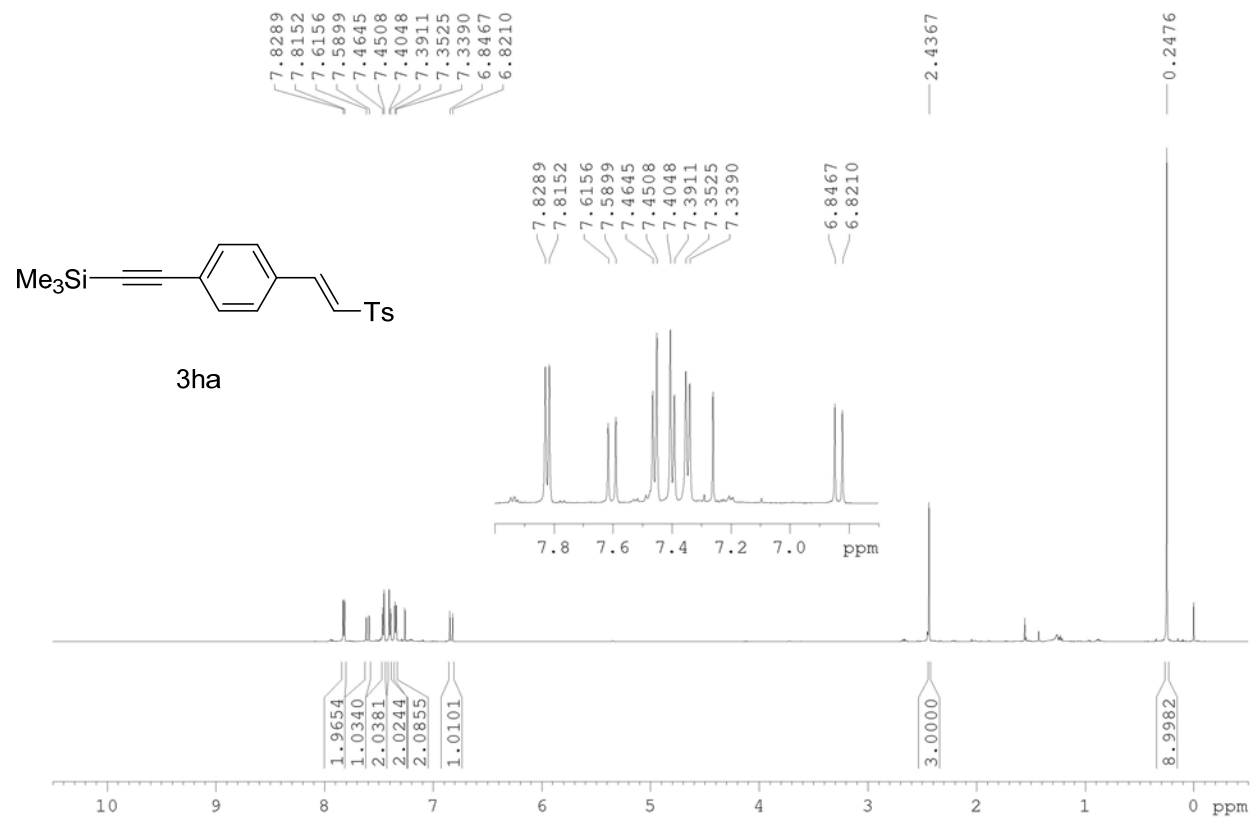

**<sup>1</sup>H NMR spectrum of compound 3ha in CDCl<sub>3</sub> (600 MHz)**

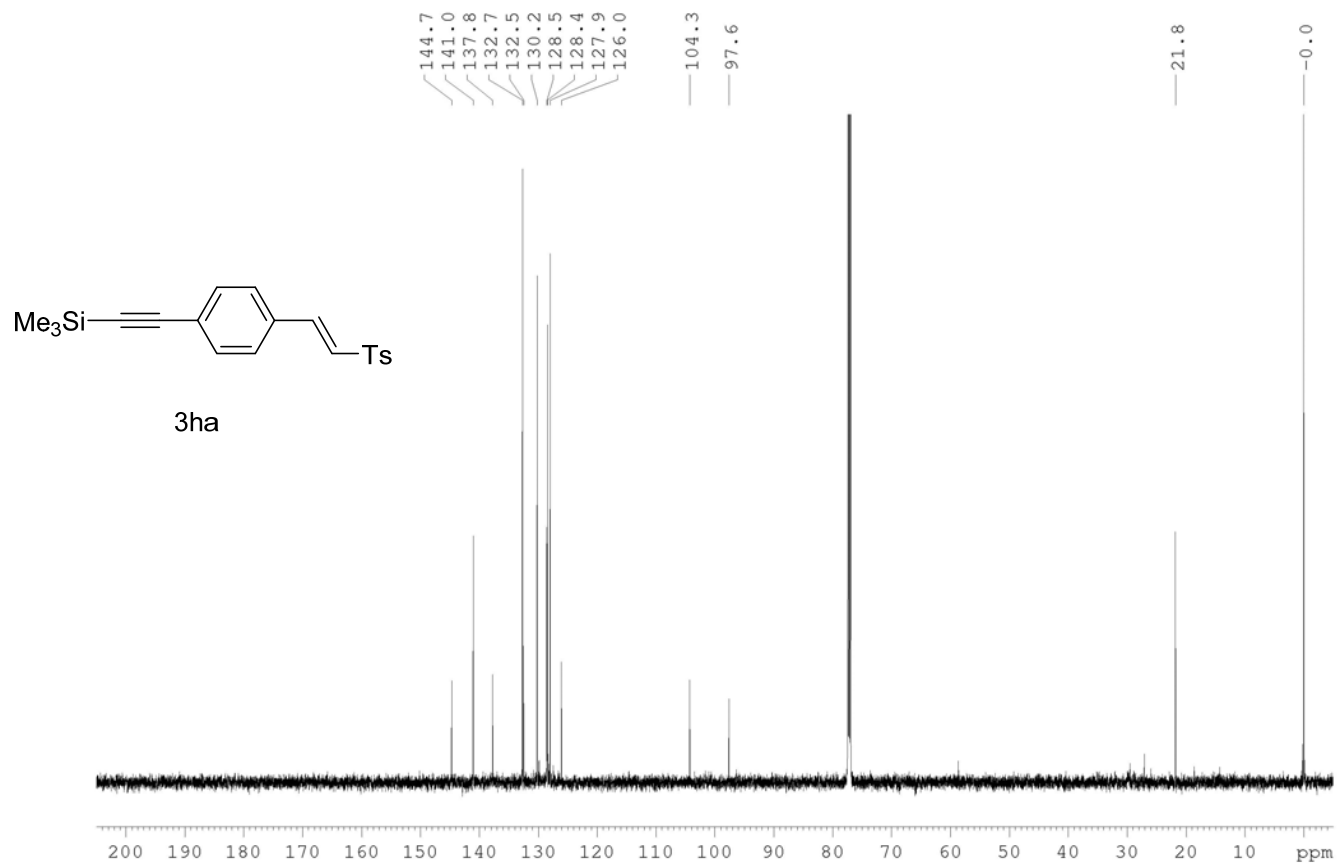

$^{13}\text{C}$  NMR spectrum of compound 3ha in  $\text{CDCl}_3$  (150 MHz)

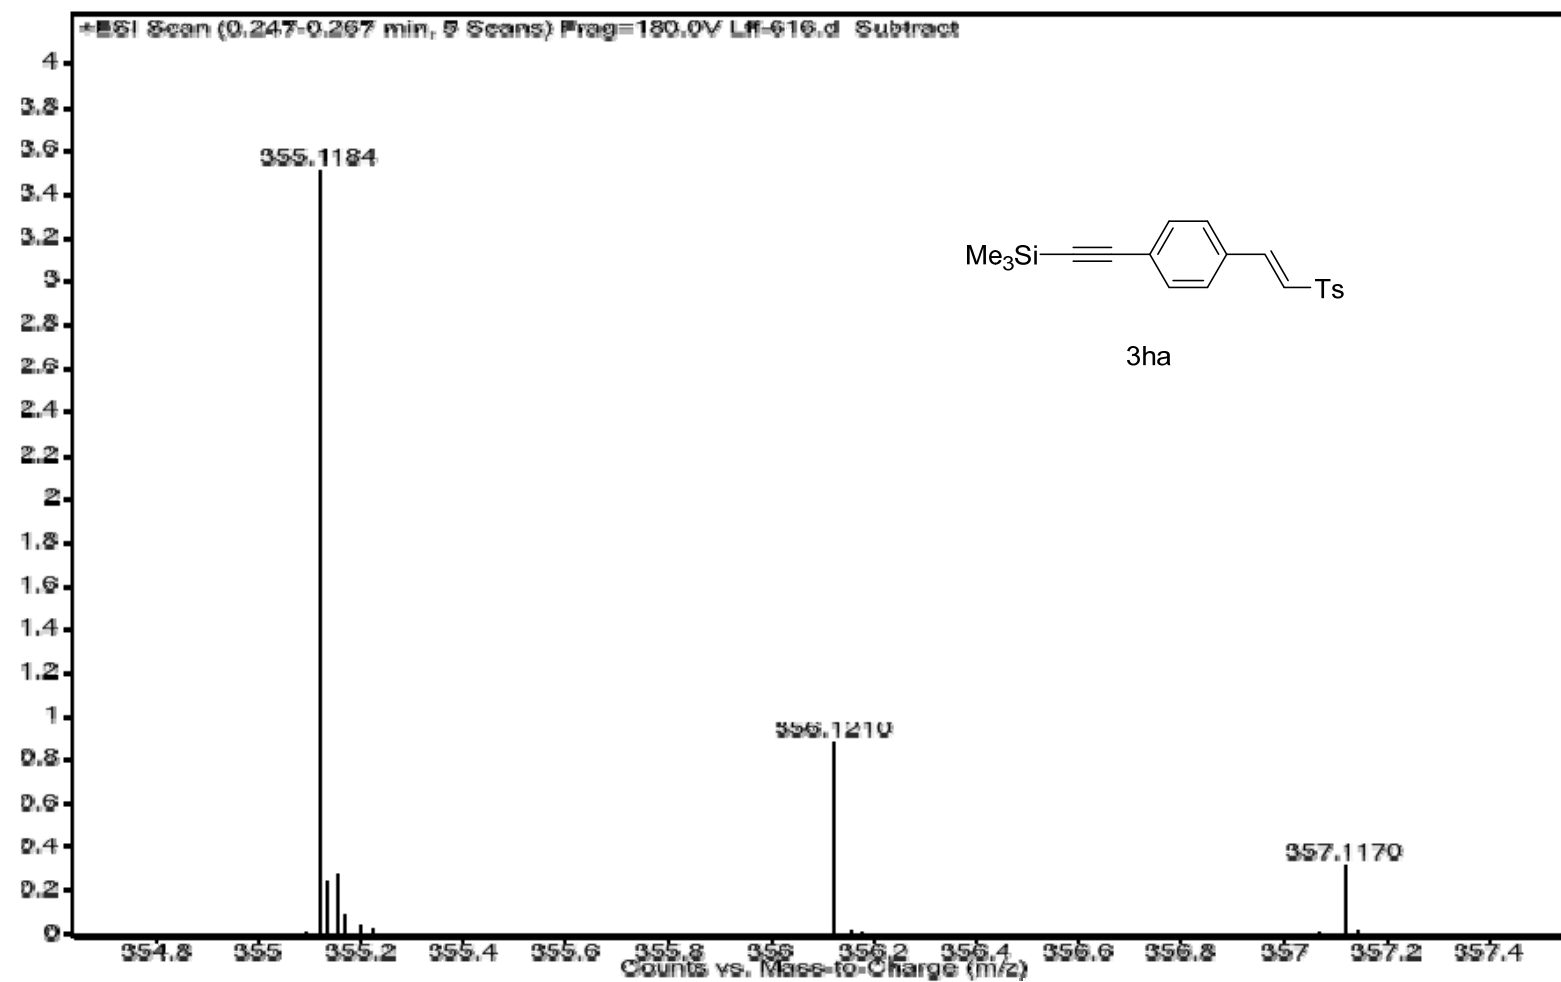

HRMS spectrum of compound 3ha

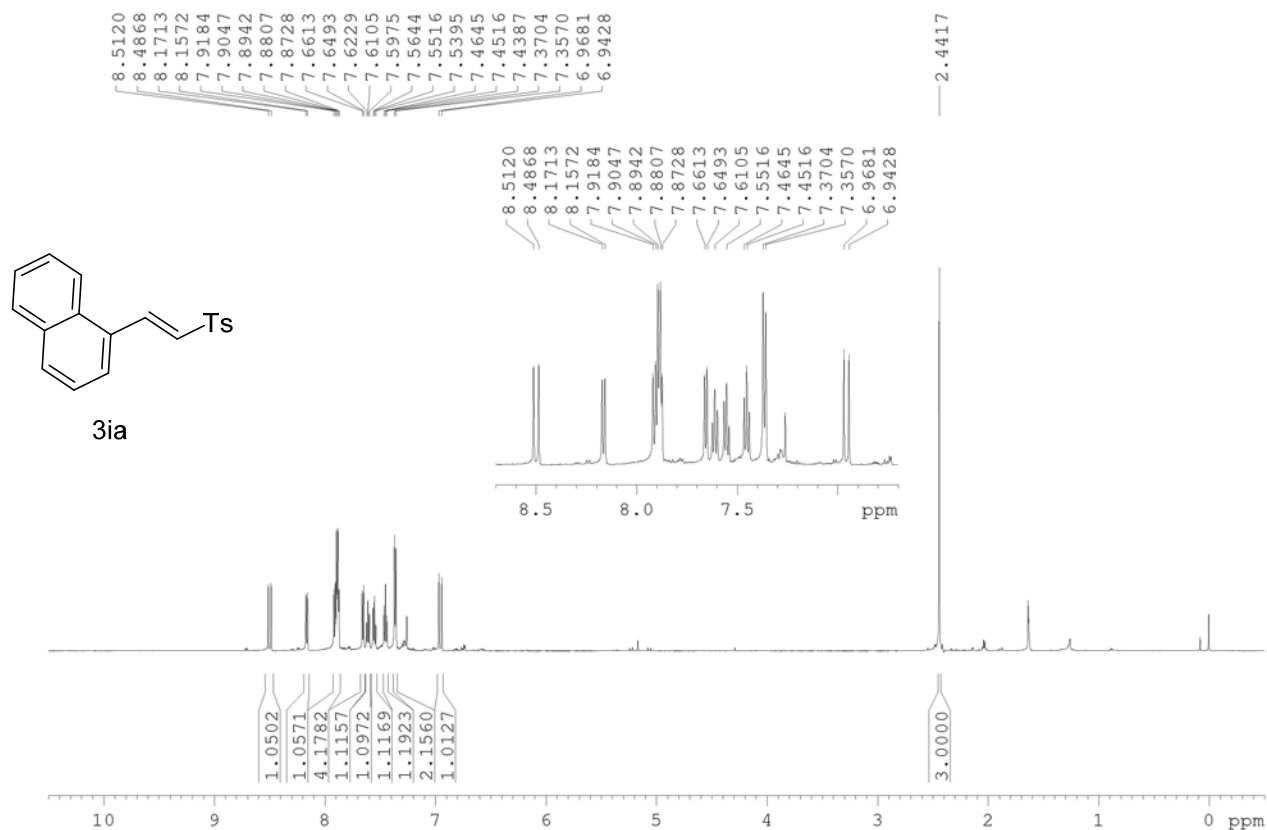

**<sup>1</sup>H NMR spectrum of compound 3ia in CDCl<sub>3</sub> (600 MHz)**



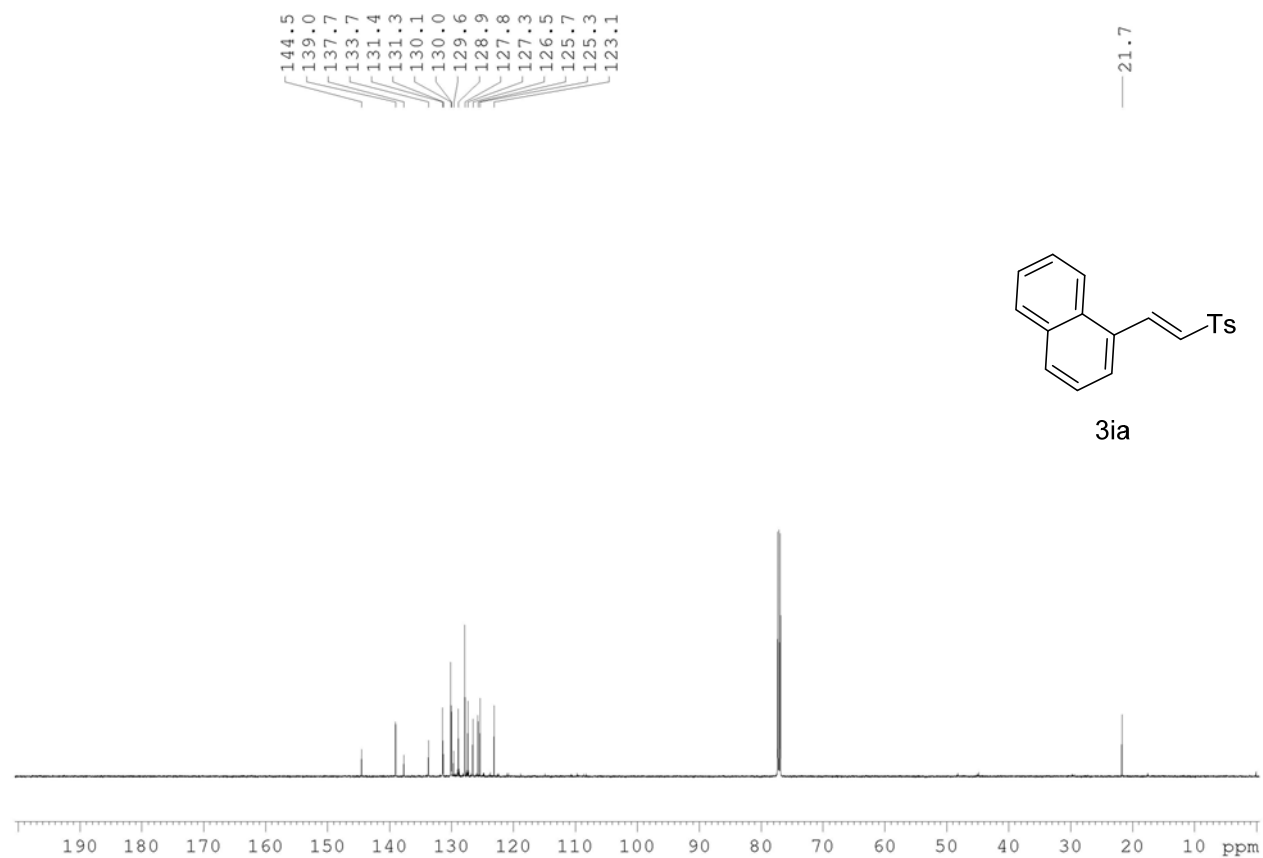

$^{13}\text{C}$  NMR spectrum of compound **3ia** in  $\text{CDCl}_3$  (150 MHz)

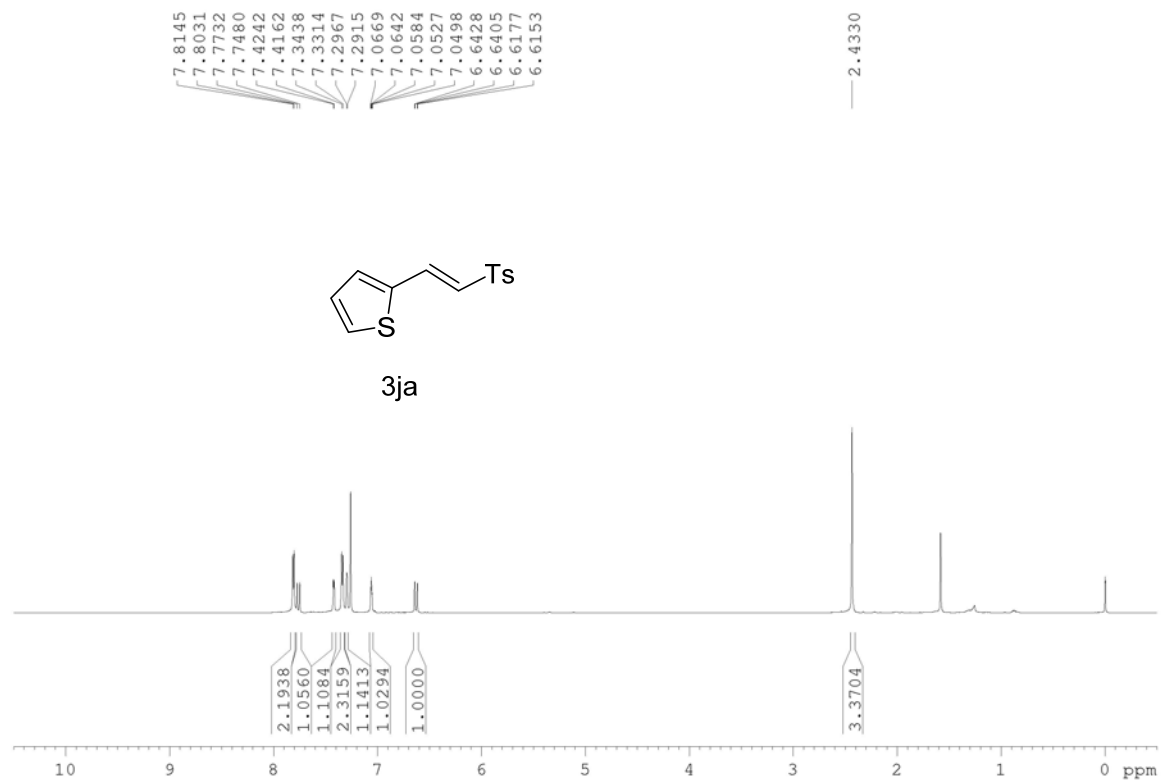

**$^1\text{H}$  NMR spectrum of compound 3ja in  $\text{CDCl}_3$  (600 MHz)**

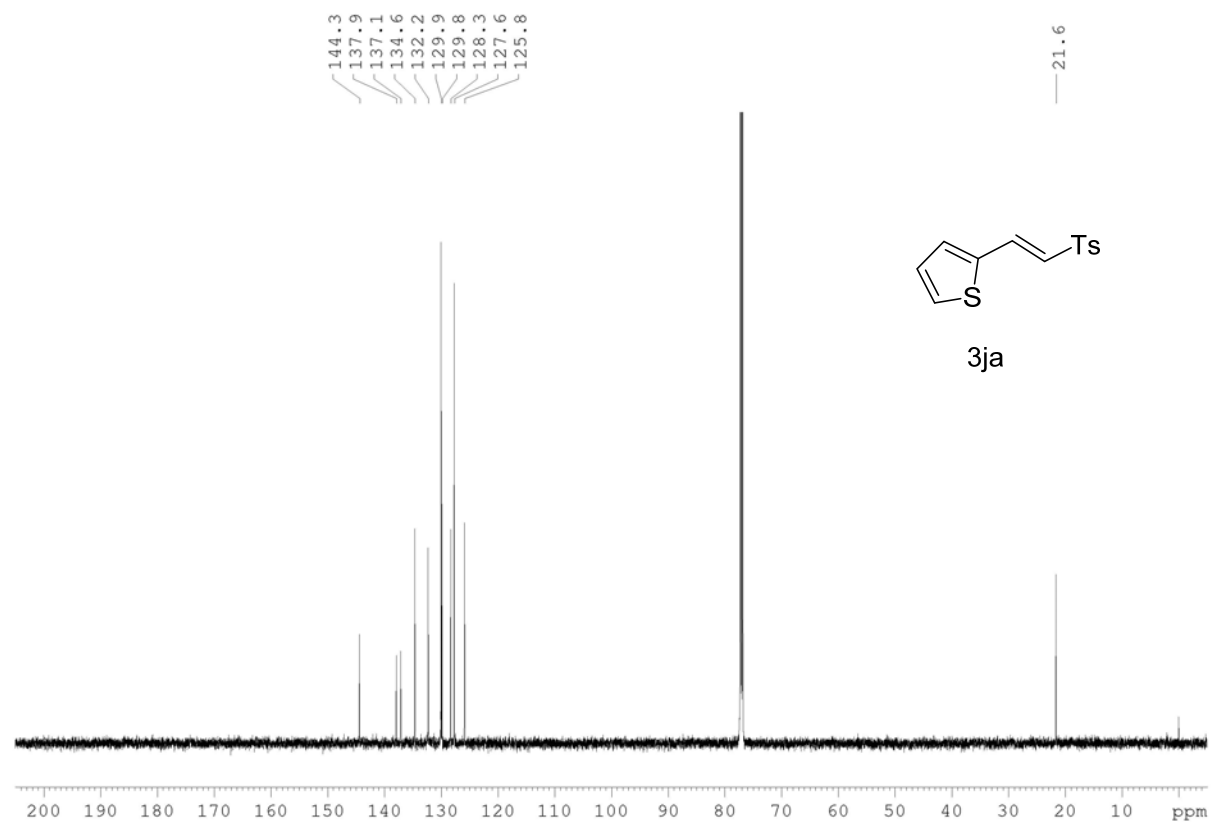

$^{13}\text{C}$  NMR spectrum of compound 3ja in  $\text{CDCl}_3$  (150 MHz)

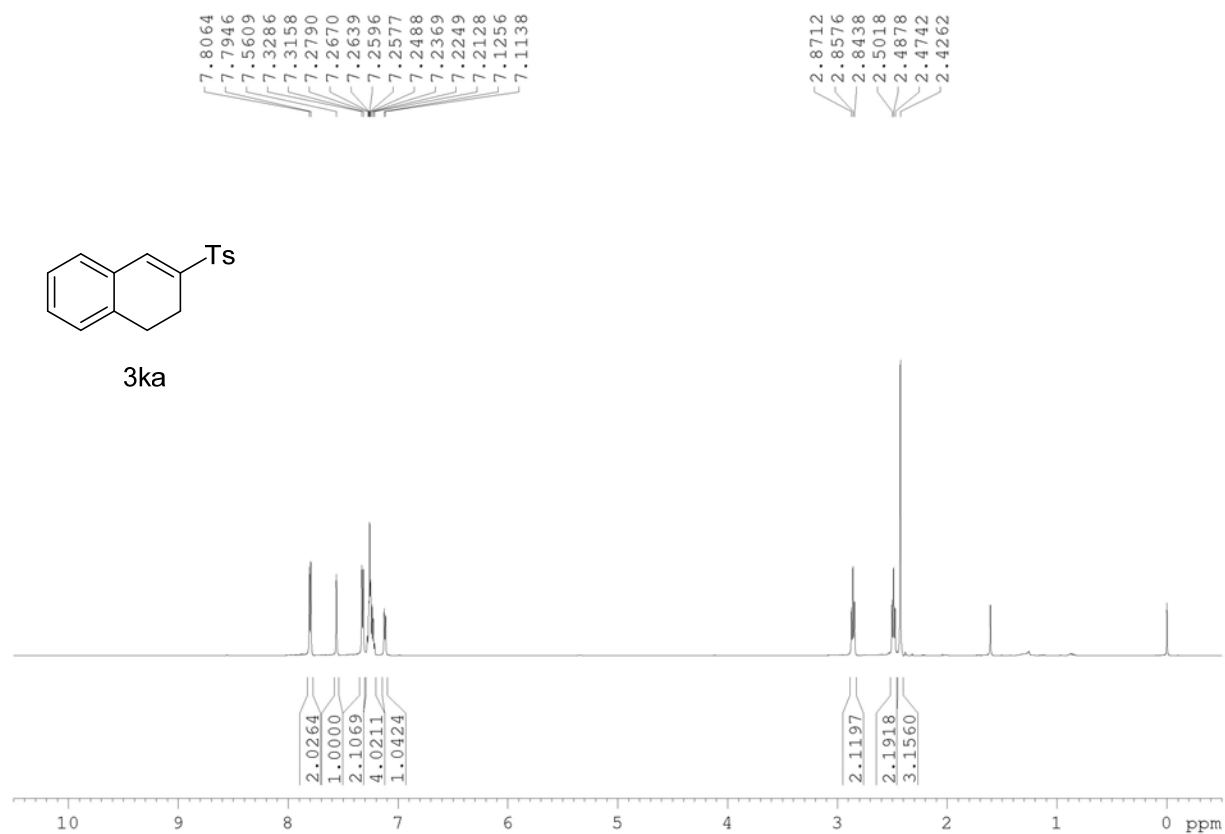

**<sup>1</sup>H NMR spectrum of compound 3ka in CDCl<sub>3</sub> (600 MHz)**

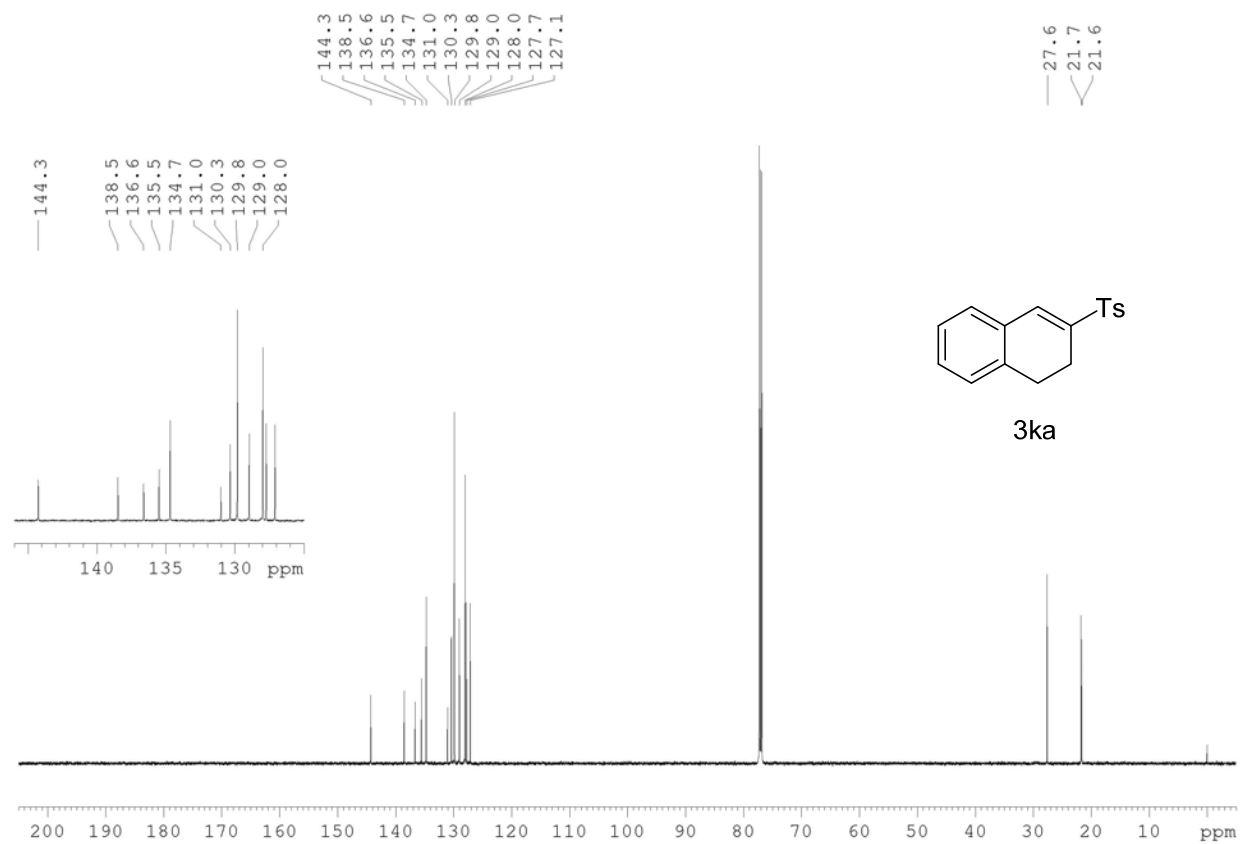

<sup>13</sup>C NMR spectrum of compound 3ka in CDCl<sub>3</sub> (150 MHz)

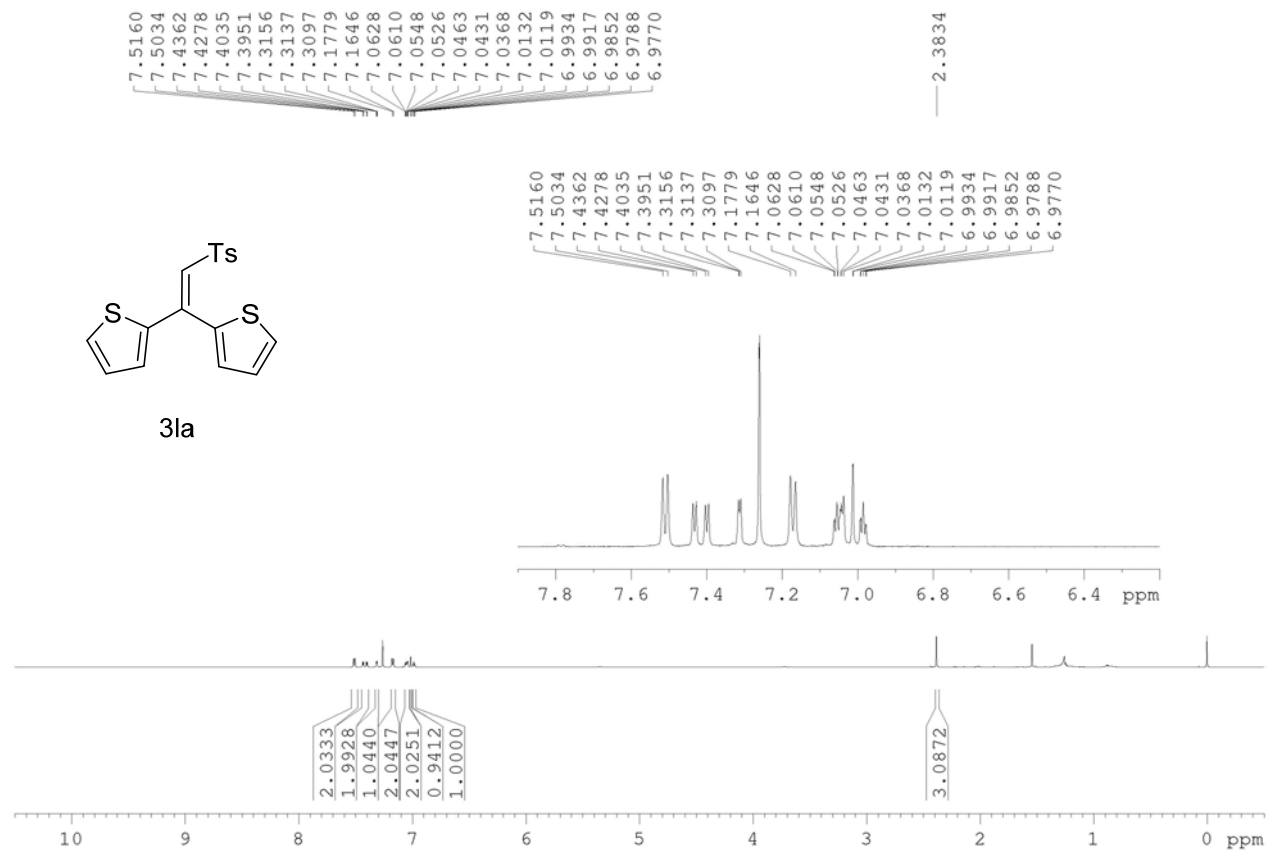

**<sup>1</sup>H NMR spectrum of compound 3la in CDCl<sub>3</sub> (600 MHz)**

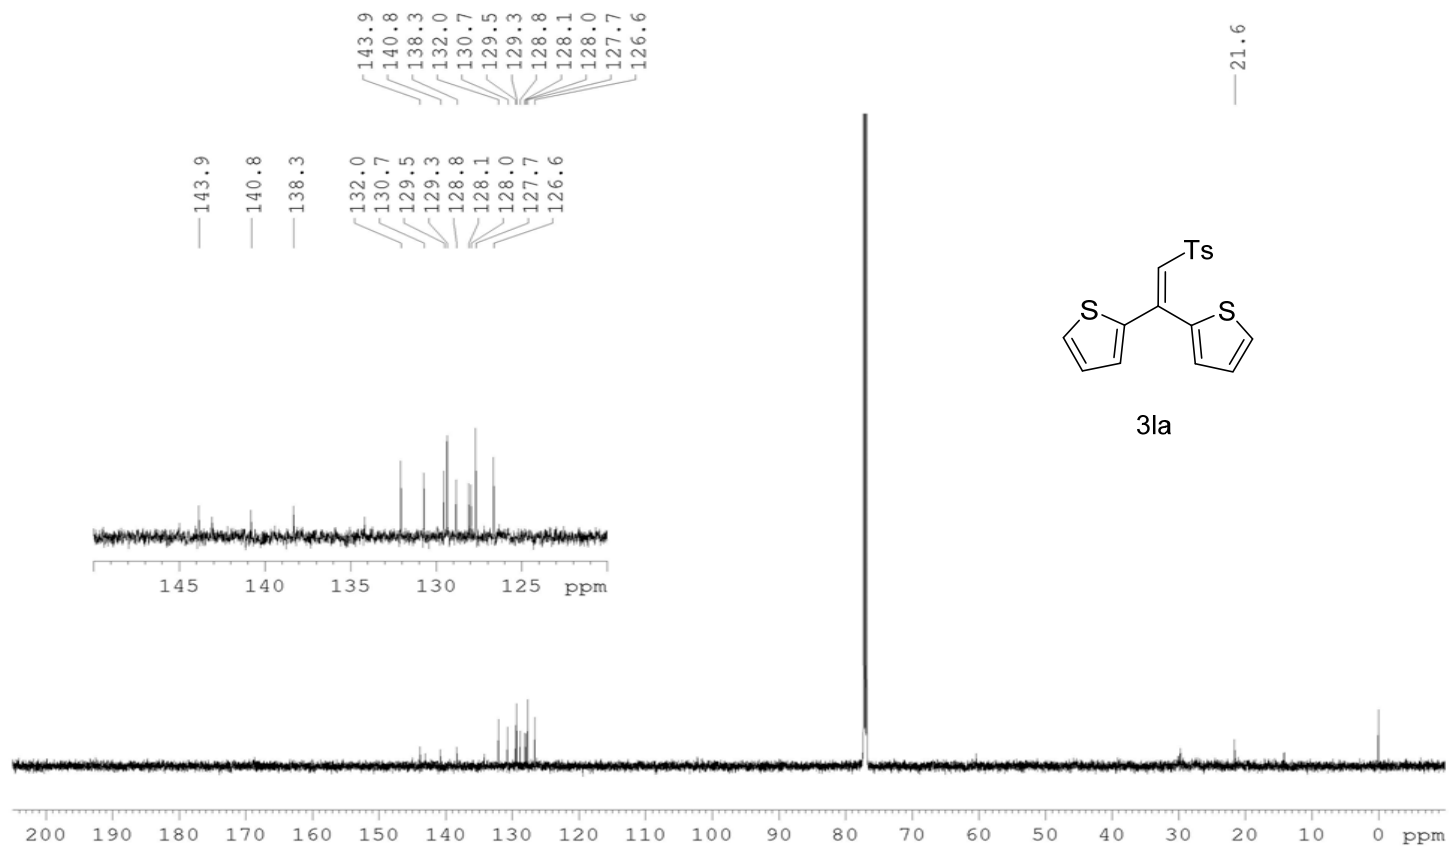

<sup>13</sup>C NMR spectrum of compound 3la in CDCl<sub>3</sub> (150 MHz)

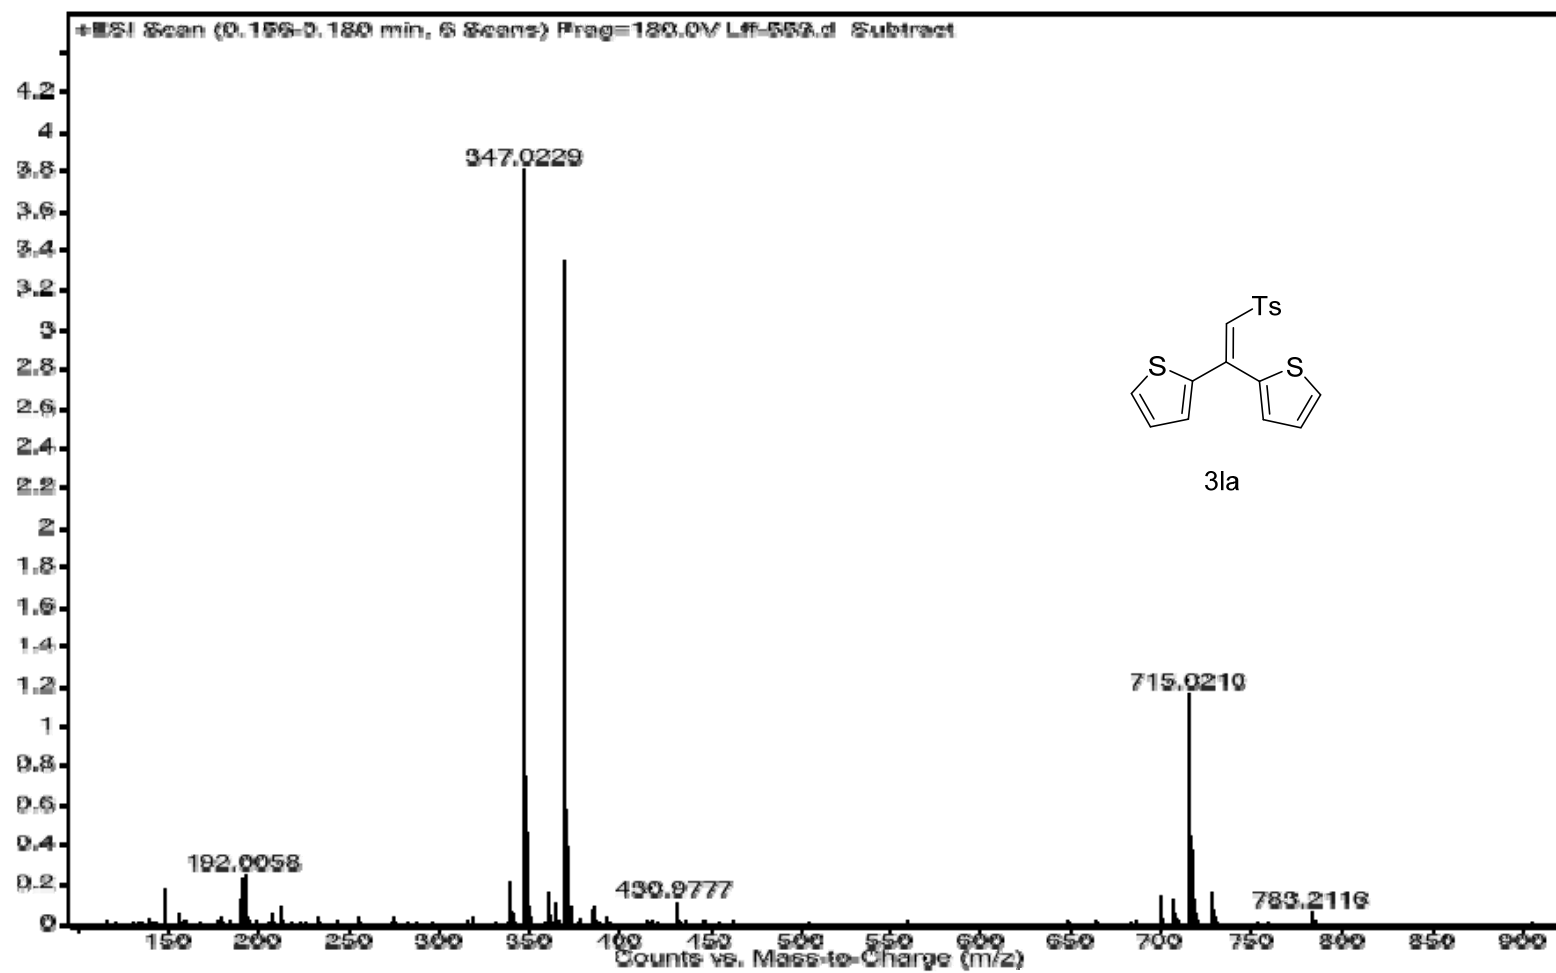

HRMS spectrum of compound 3la



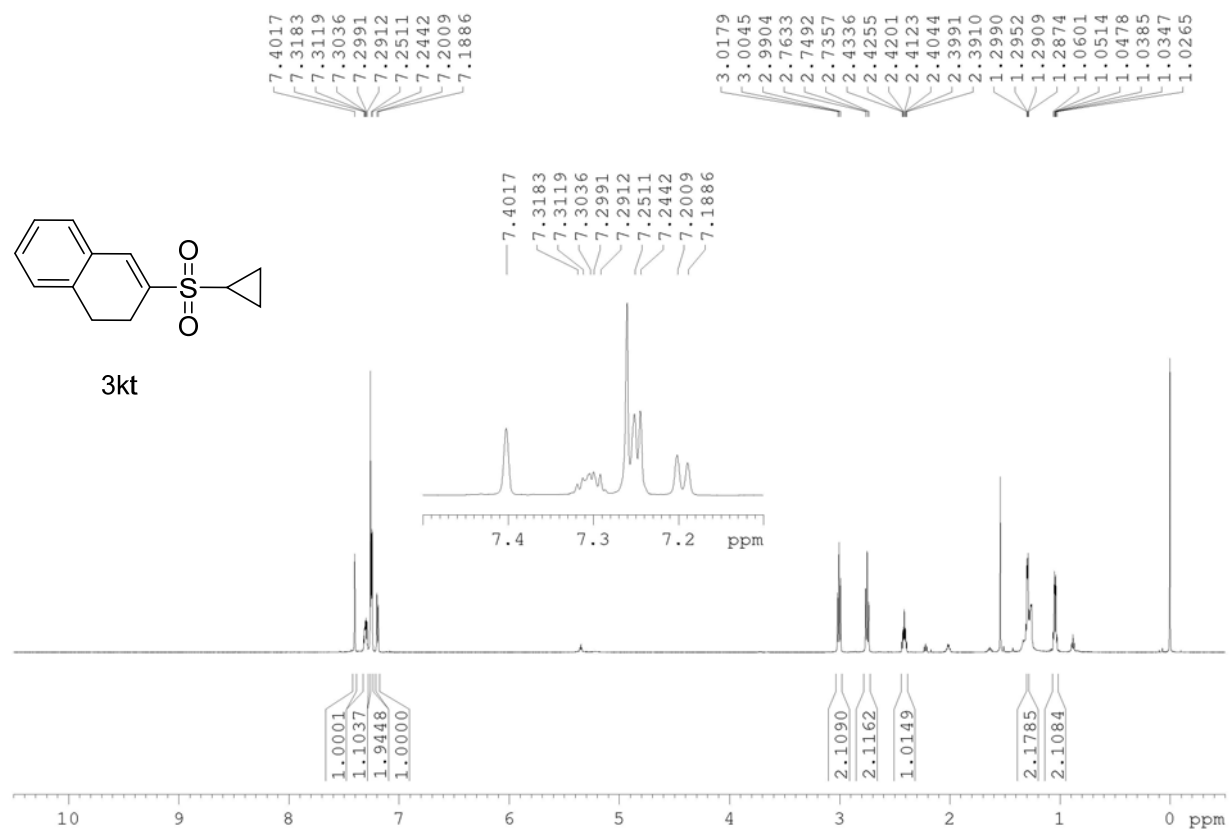

<sup>1</sup>H NMR spectrum of compound 3kt in CDCl<sub>3</sub> (600 MHz)

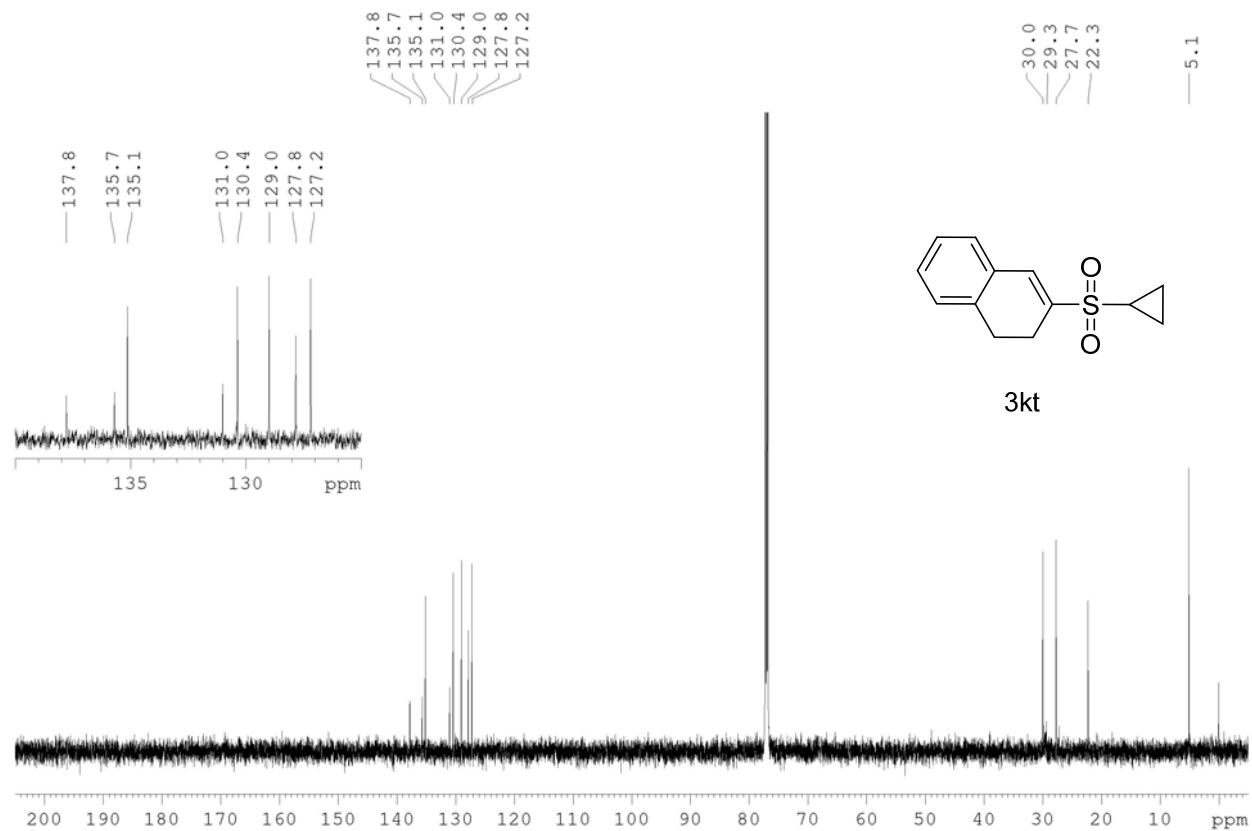

<sup>13</sup>C NMR spectrum of compound 3kt in CDCl<sub>3</sub> (150 MHz)

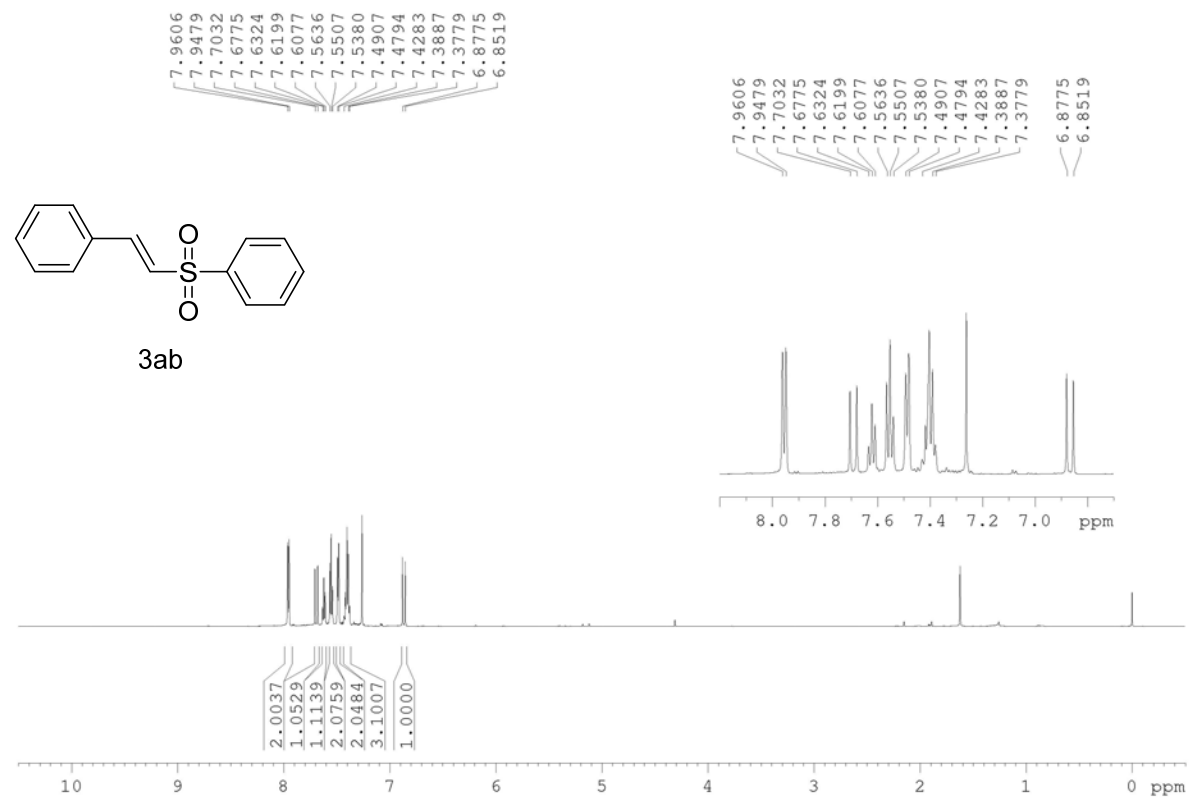

**$^1\text{H}$  NMR spectrum of compound 3ab in  $\text{CDCl}_3$  (600 MHz)**

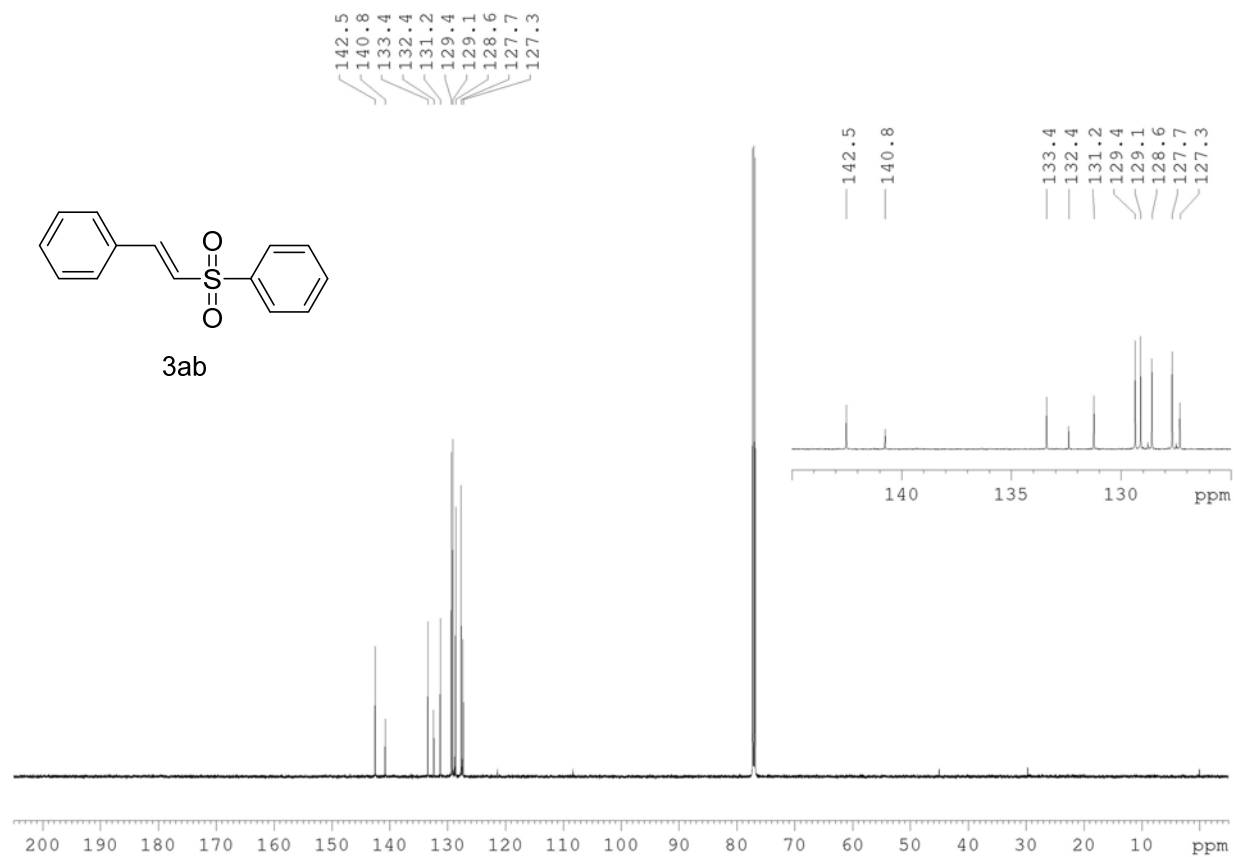

**$^{13}\text{C}$  NMR spectrum of compound 3ab in  $\text{CDCl}_3$  (150 MHz)**

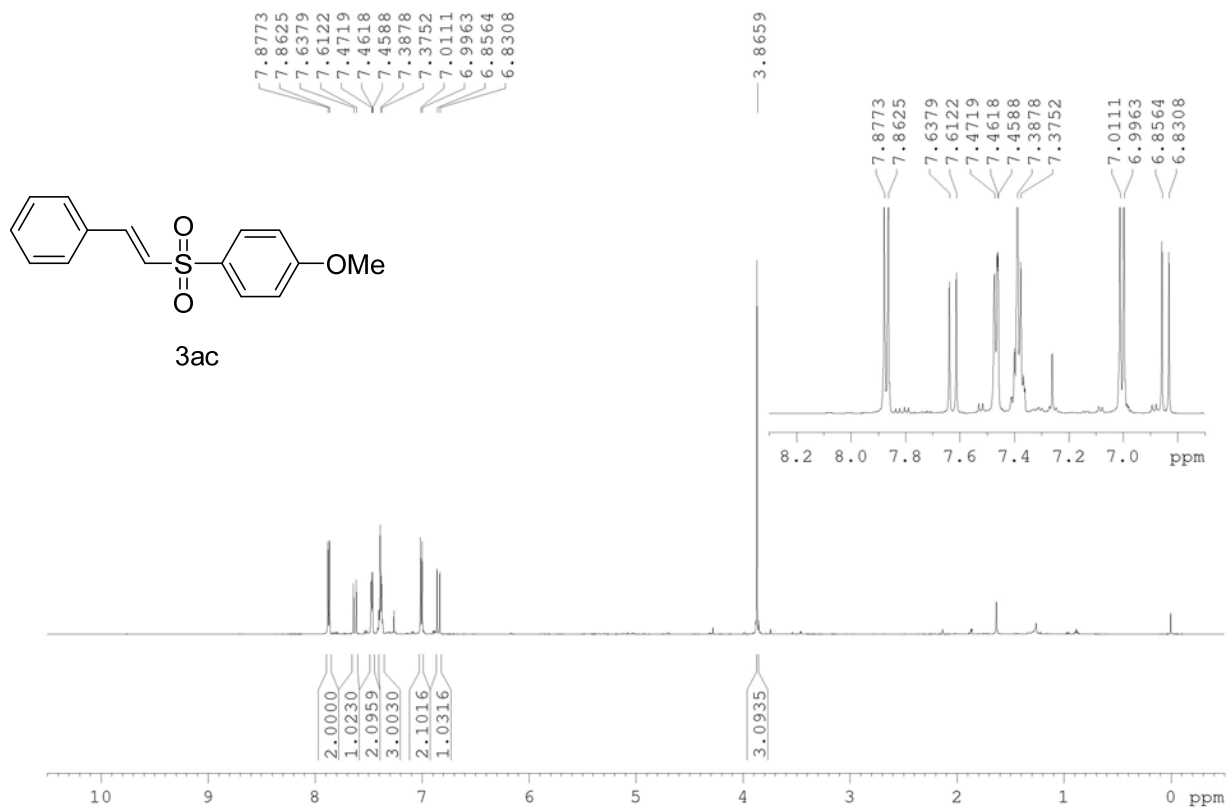

**<sup>1</sup>H NMR spectrum of compound 3ac in CDCl<sub>3</sub> (600 MHz)**

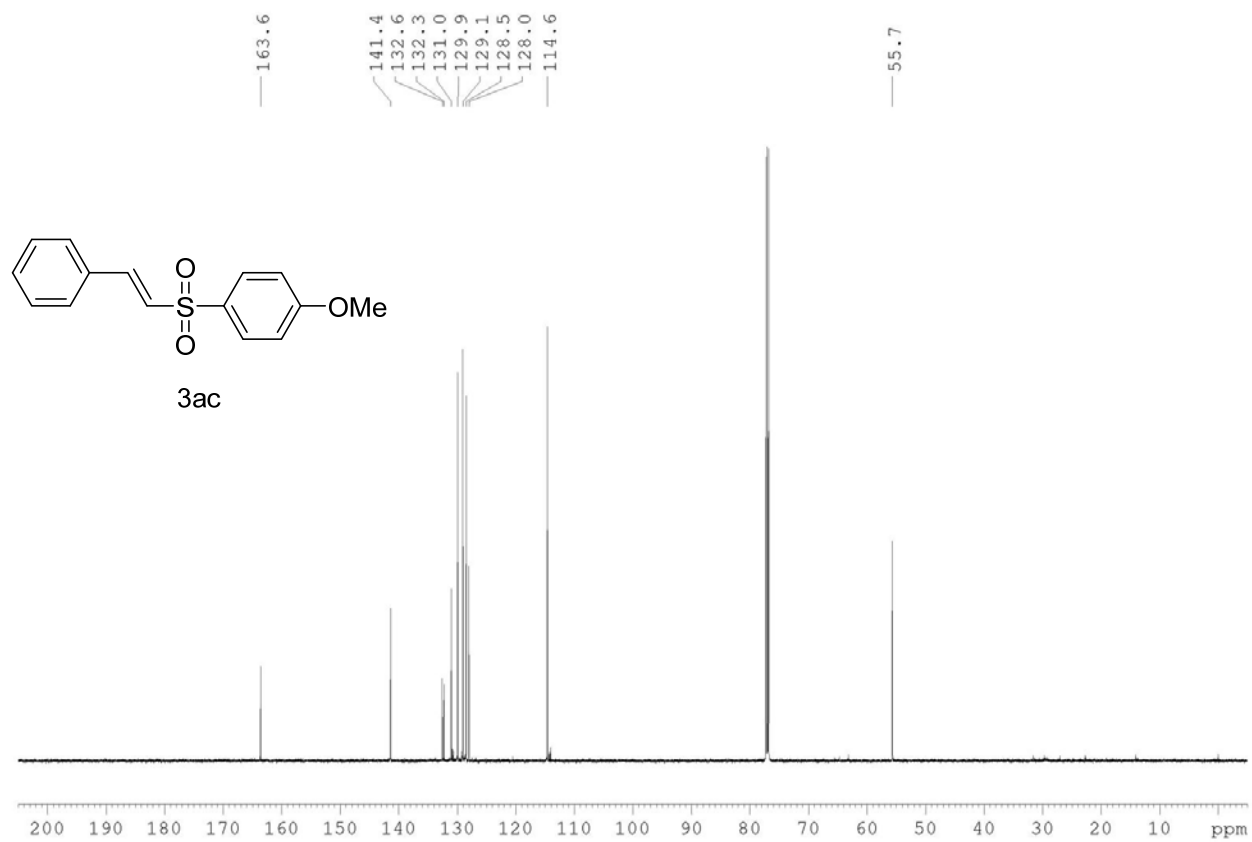

**<sup>13</sup>C NMR spectrum of compound 3ac in CDCl<sub>3</sub> (150 MHz)**

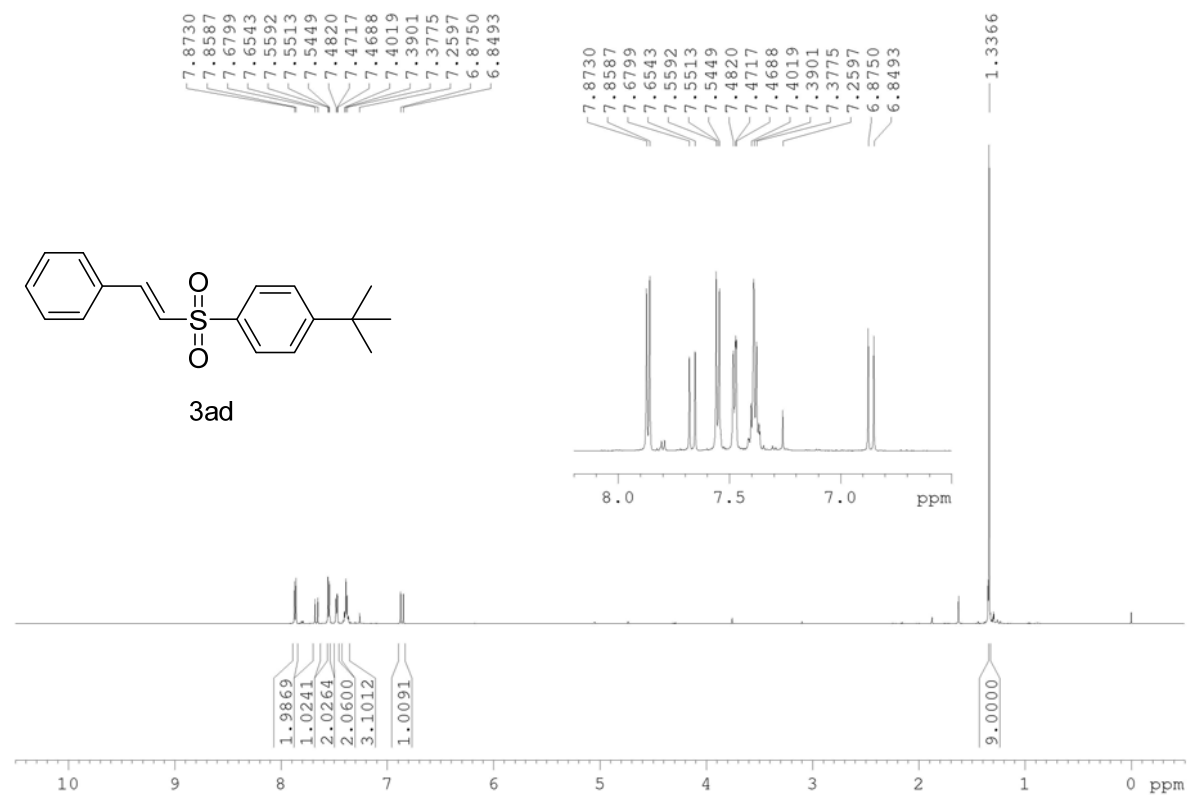

**$^1\text{H}$  NMR spectrum of compound 3ad in  $\text{CDCl}_3$  (600 MHz)**

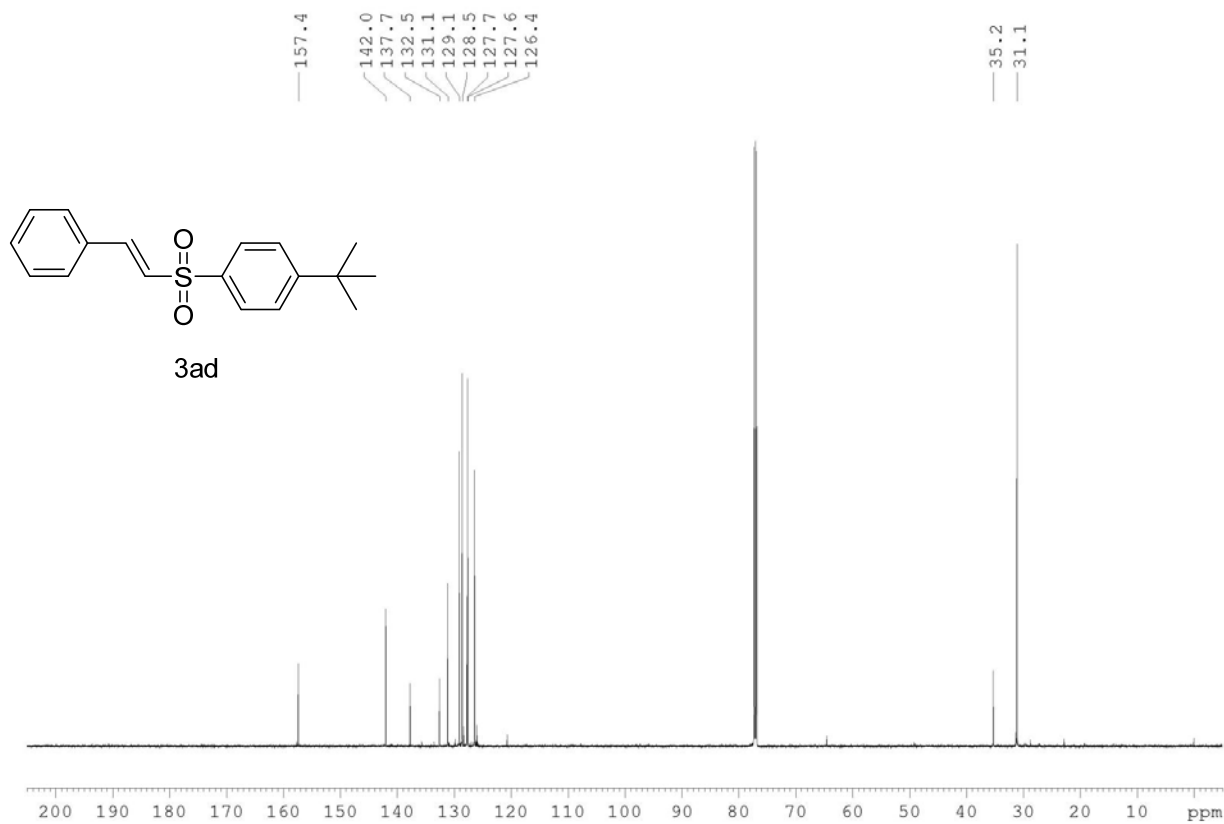

**$^{13}\text{C}$  NMR spectrum of compound 3ad in  $\text{CDCl}_3$  (150 MHz)**



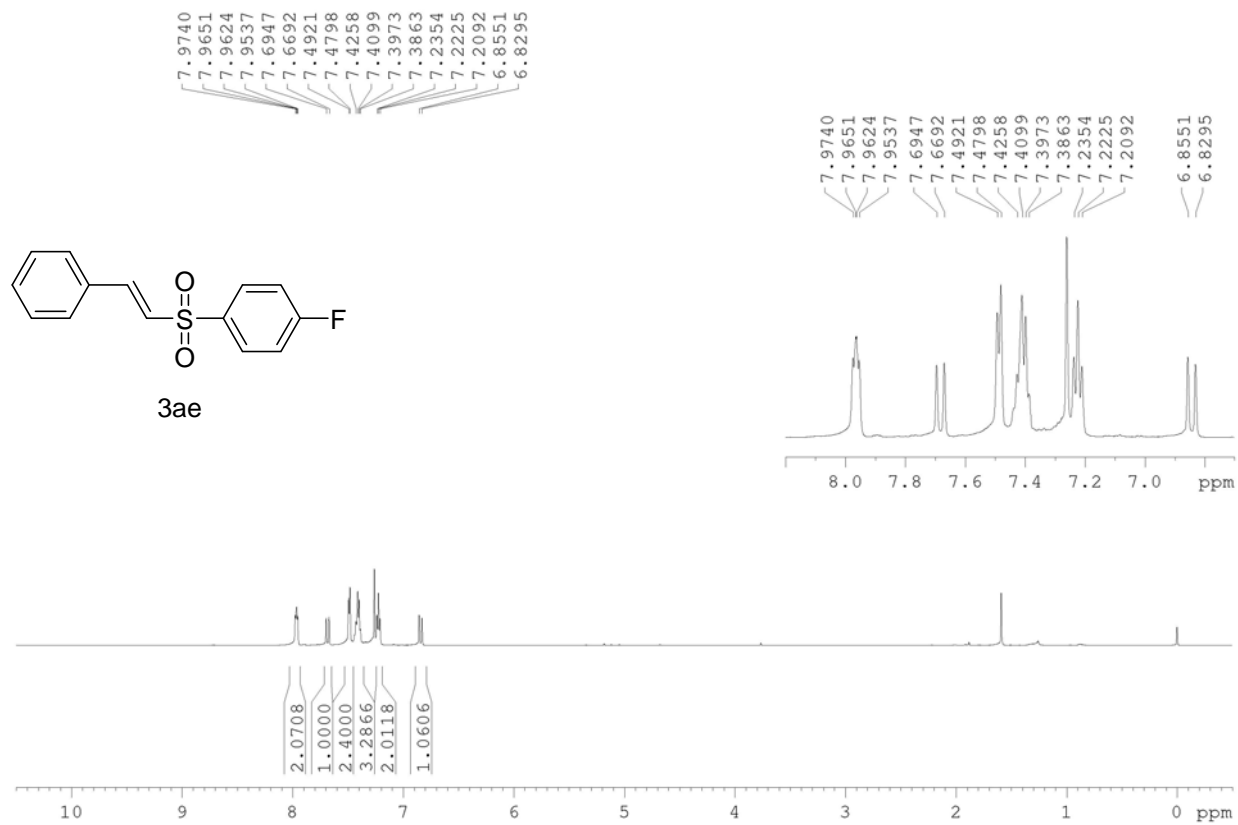

**<sup>1</sup>H NMR spectrum of compound 3ae in CDCl<sub>3</sub> (600 MHz)**

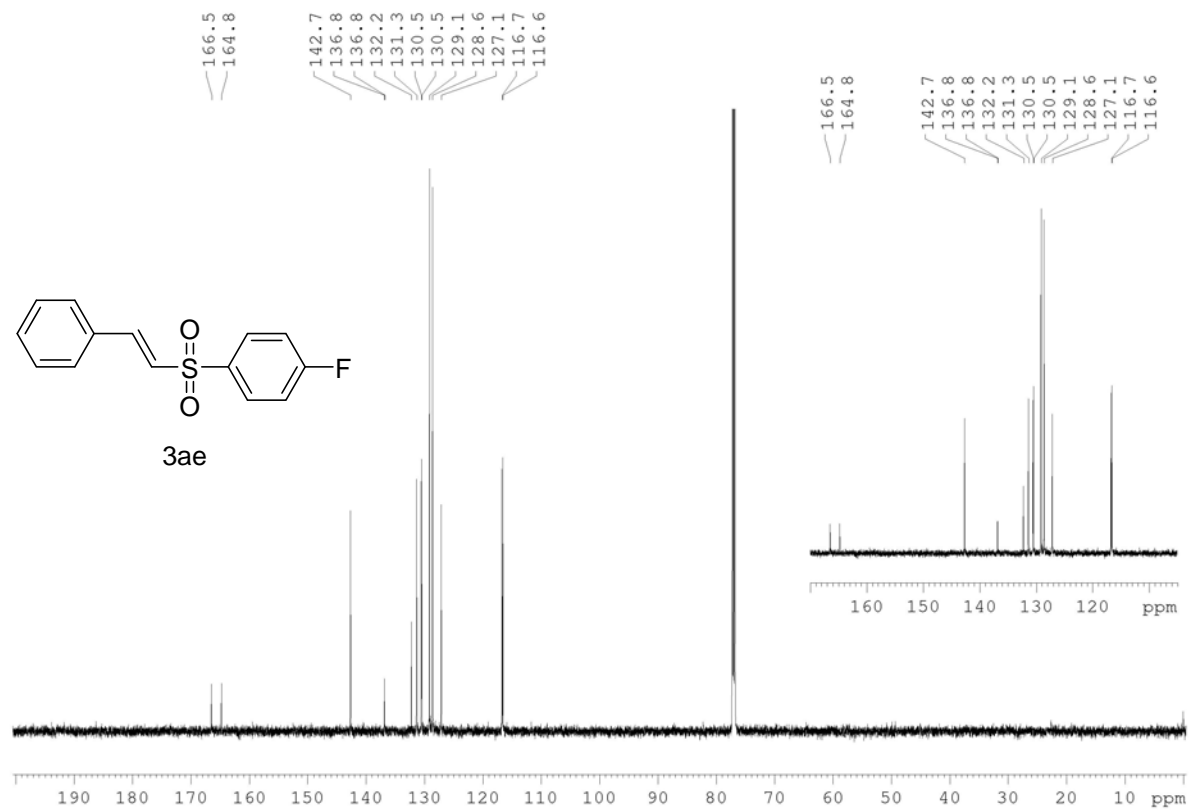

<sup>13</sup>C NMR spectrum of compound 3ae in CDCl<sub>3</sub> (150 MHz)

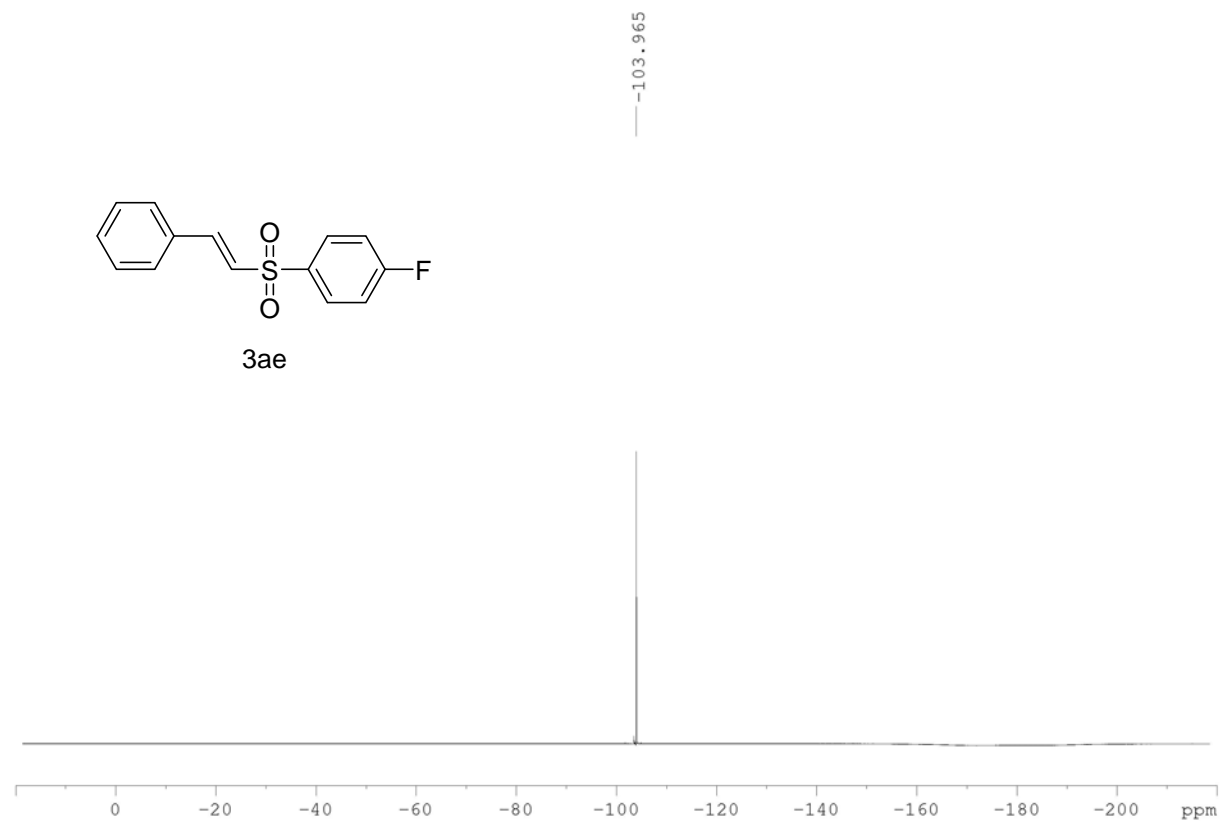

**$^{19}\text{F}$  NMR spectrum of compound 3ae in  $\text{CDCl}_3$  (565 MHz)**

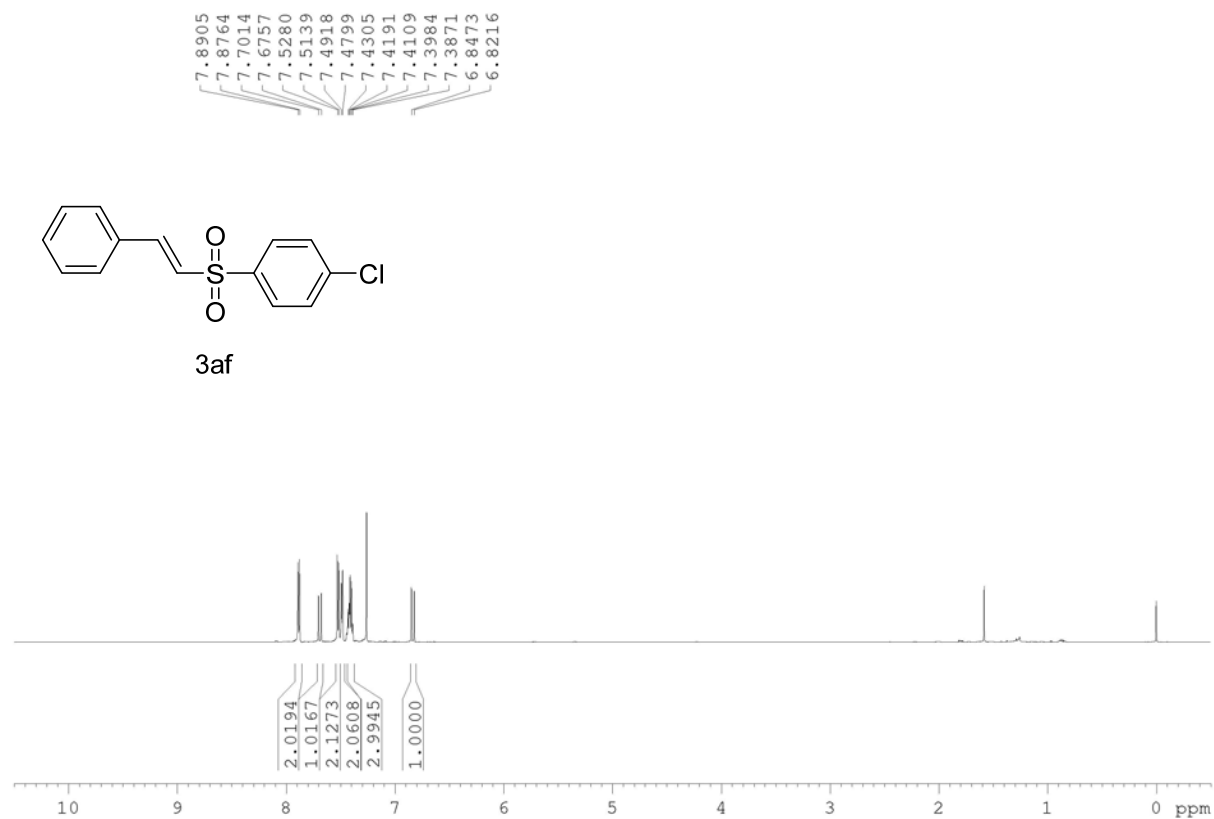

**<sup>1</sup>H NMR spectrum of compound 3af in CDCl<sub>3</sub> (600 MHz)**

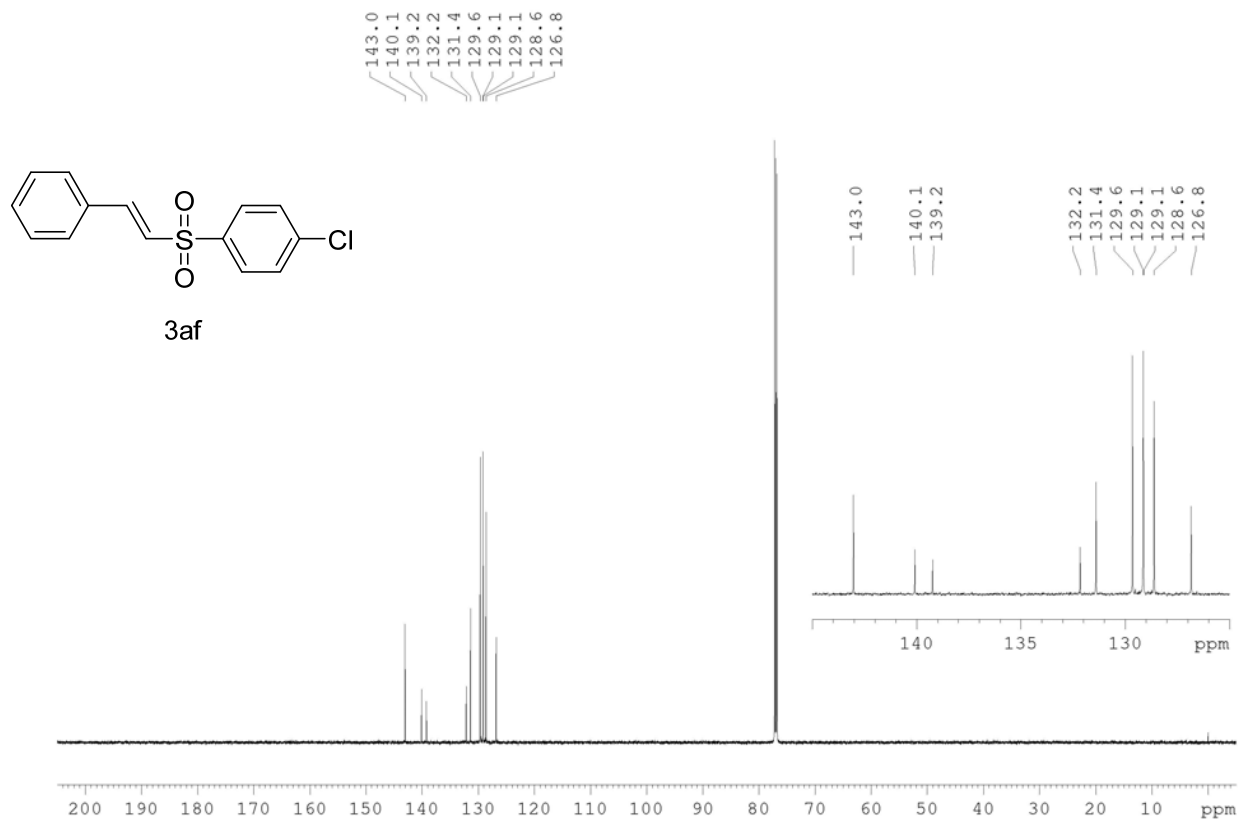

**$^{13}\text{C}$  NMR spectrum of compound 3af in  $\text{CDCl}_3$  (150 MHz)**

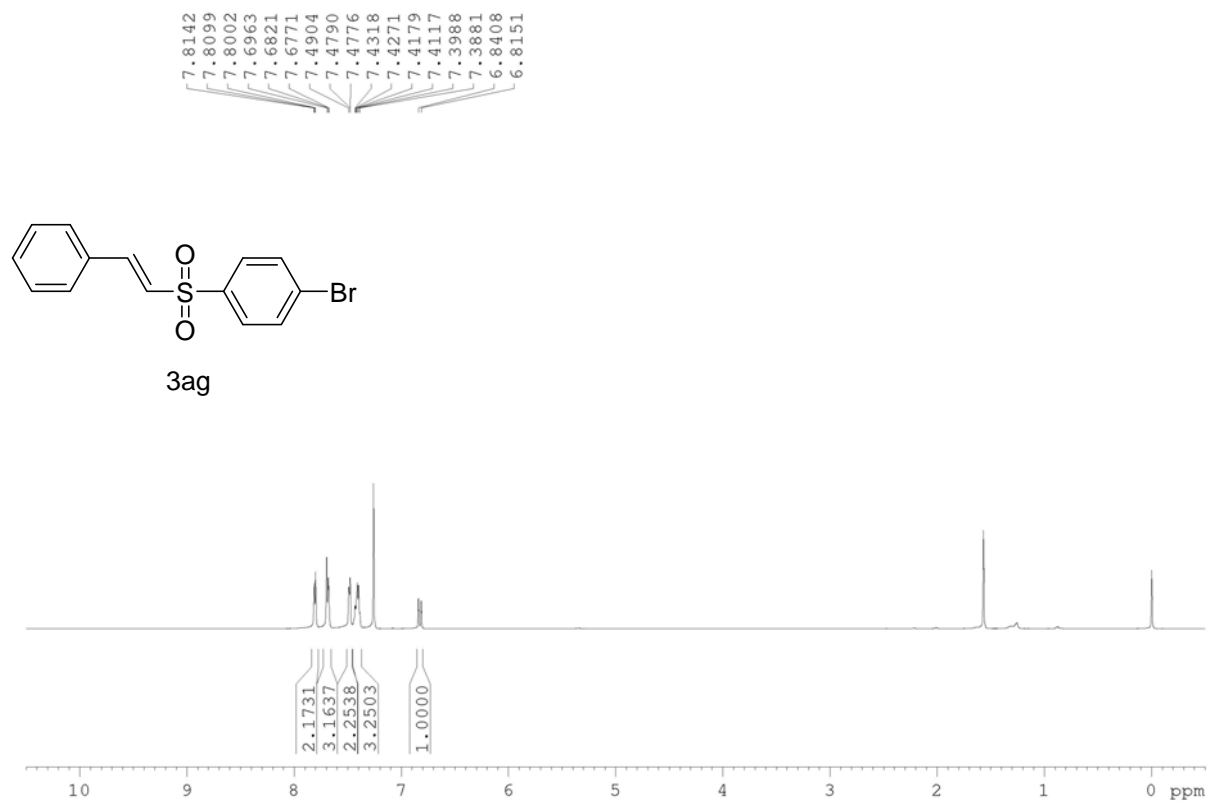

**<sup>1</sup>H NMR spectrum of compound 3ag in CDCl<sub>3</sub> (600 MHz)**

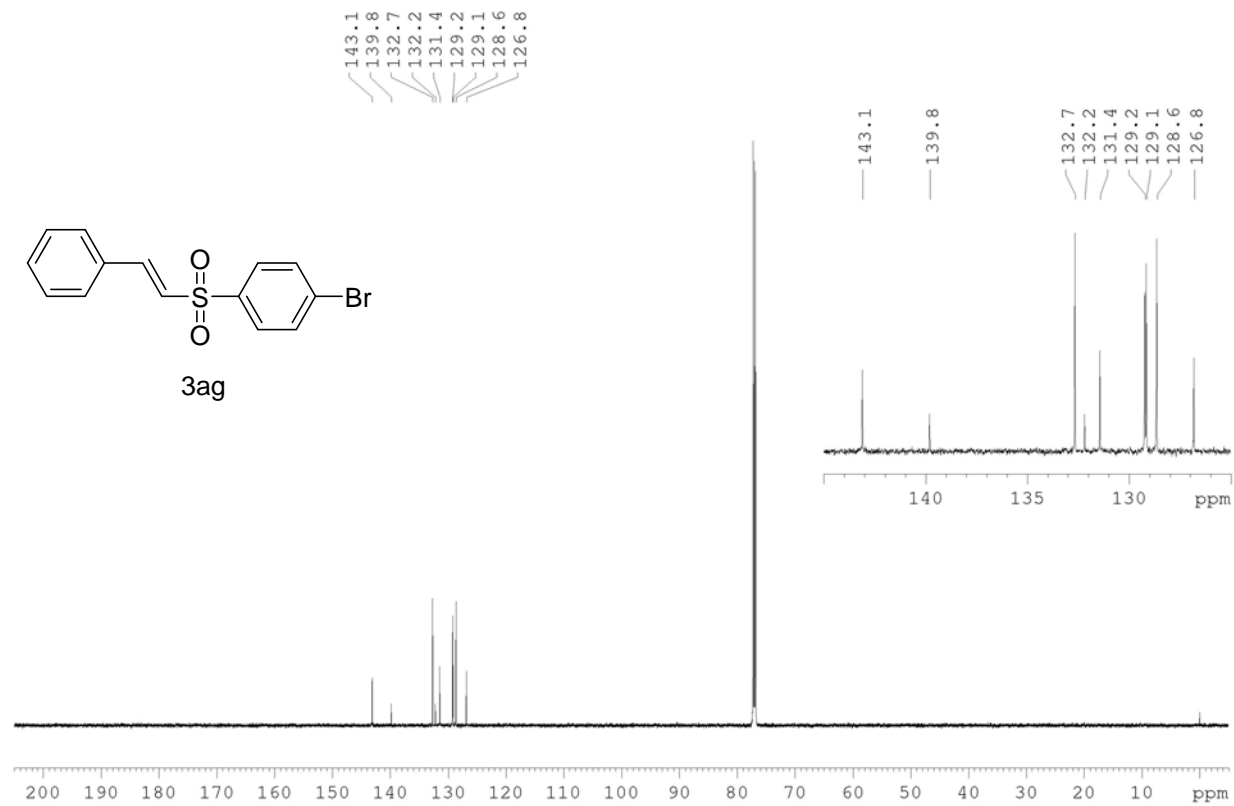

<sup>13</sup>C NMR spectrum of compound 3ag in CDCl<sub>3</sub> (150 MHz)

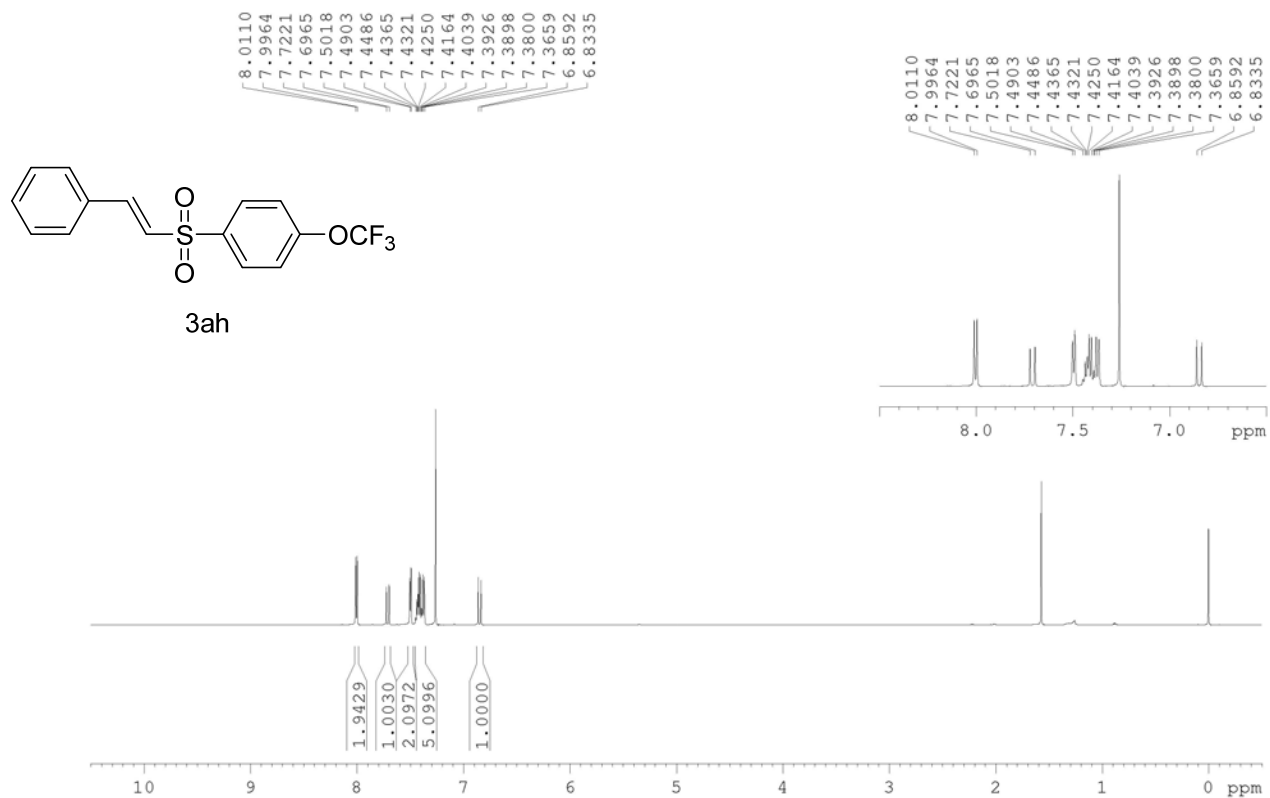

**$^1\text{H}$  NMR spectrum of compound 3ah in  $\text{CDCl}_3$  (600 MHz)**



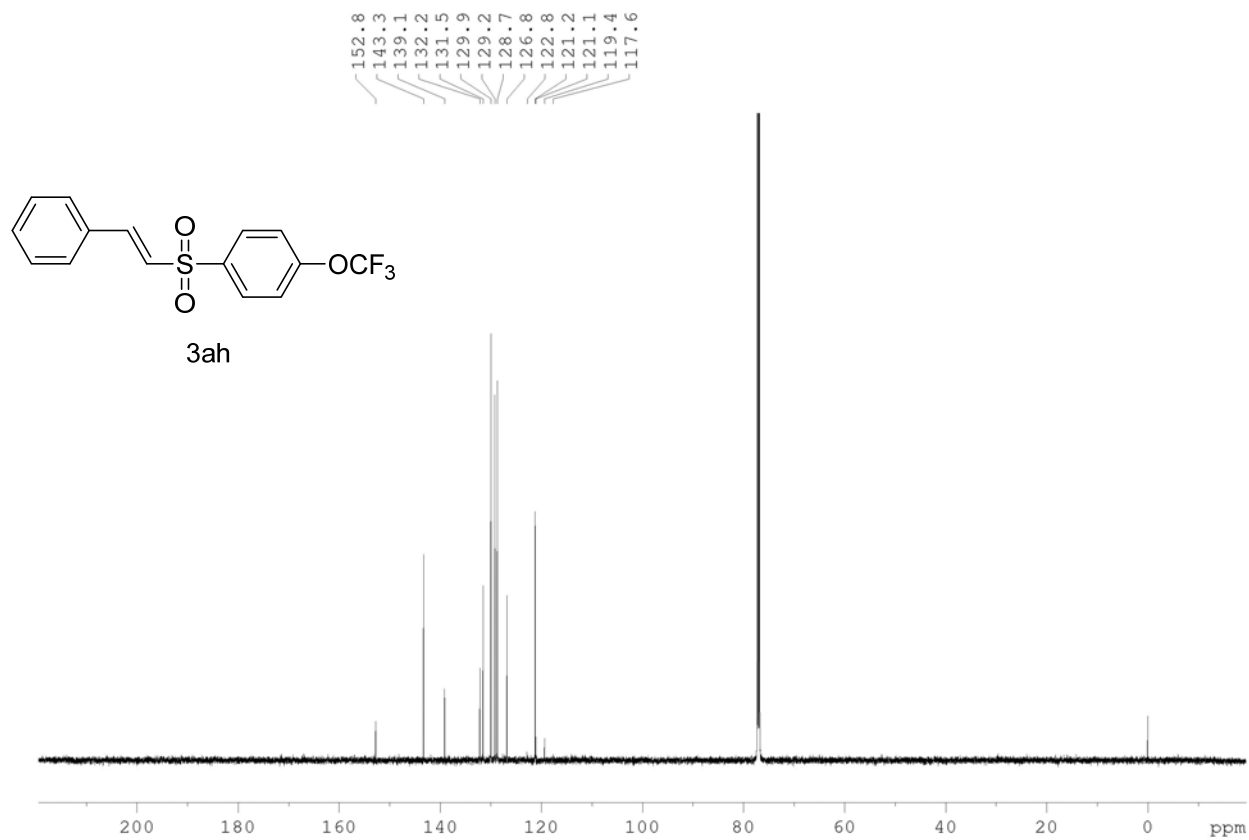

<sup>13</sup>C NMR spectrum of compound 3ah in CDCl<sub>3</sub> (150 MHz)

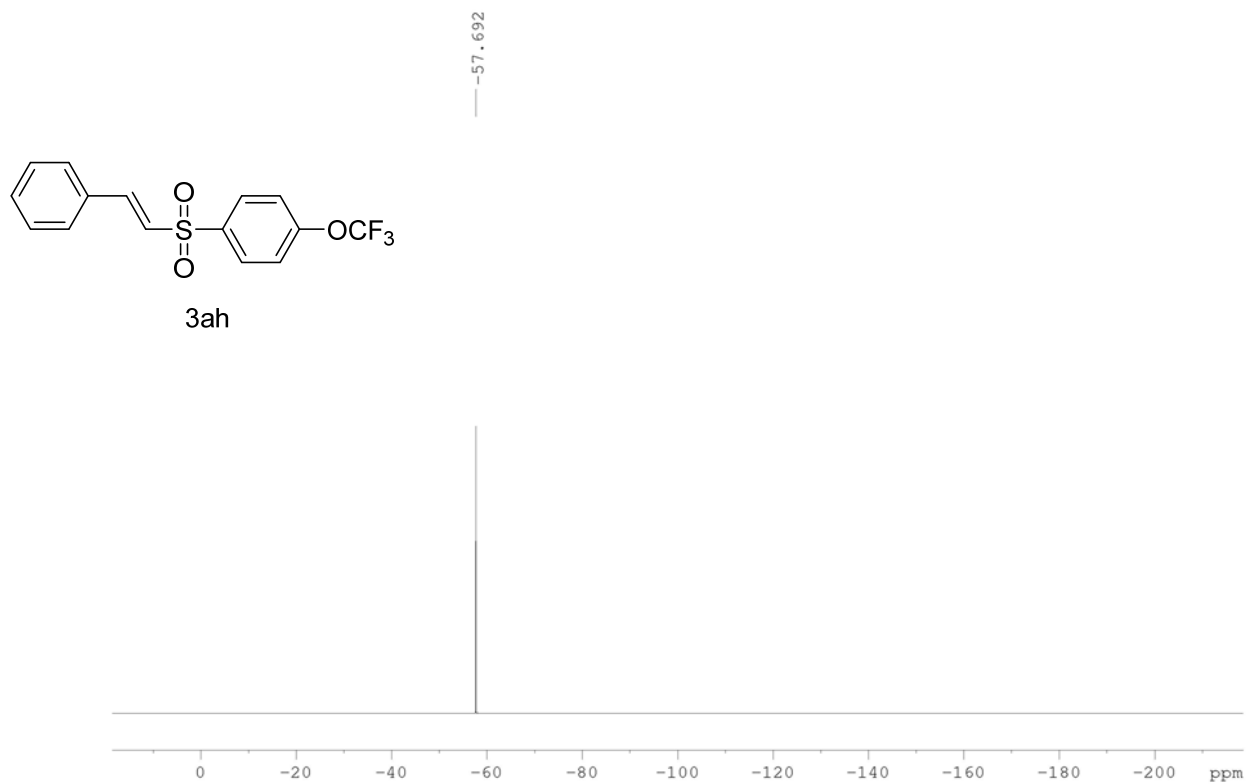

**<sup>19</sup>F NMR spectrum of compound 3ah in CDCl<sub>3</sub> (565 MHz)**

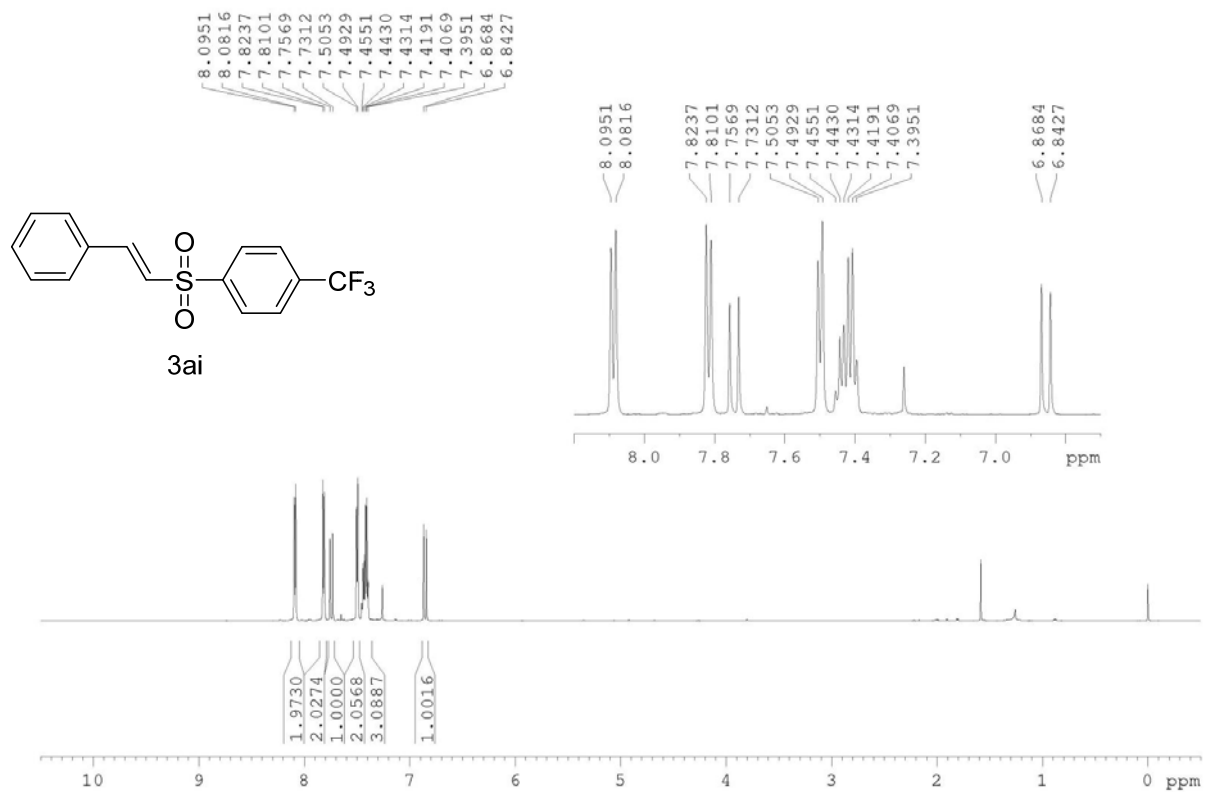

**<sup>1</sup>H NMR spectrum of compound 3ai in CDCl<sub>3</sub> (600 MHz)**

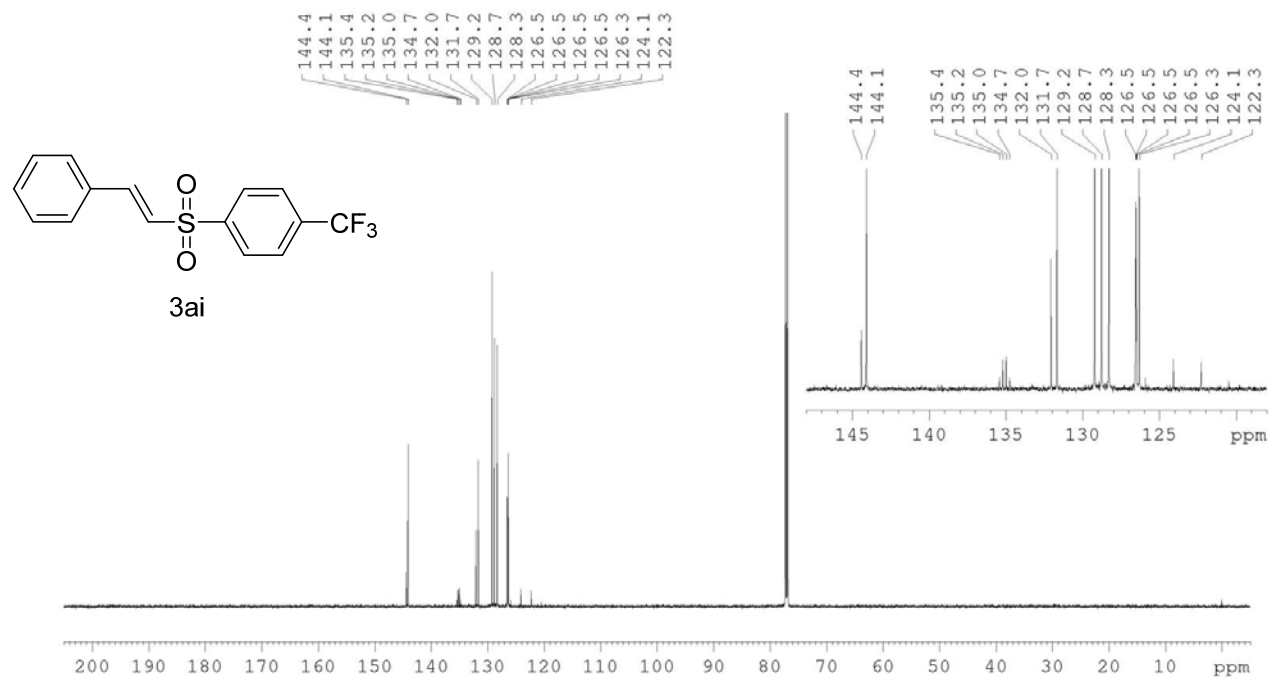

<sup>13</sup>C NMR spectrum of compound 3ai in CDCl<sub>3</sub> (150 MHz)

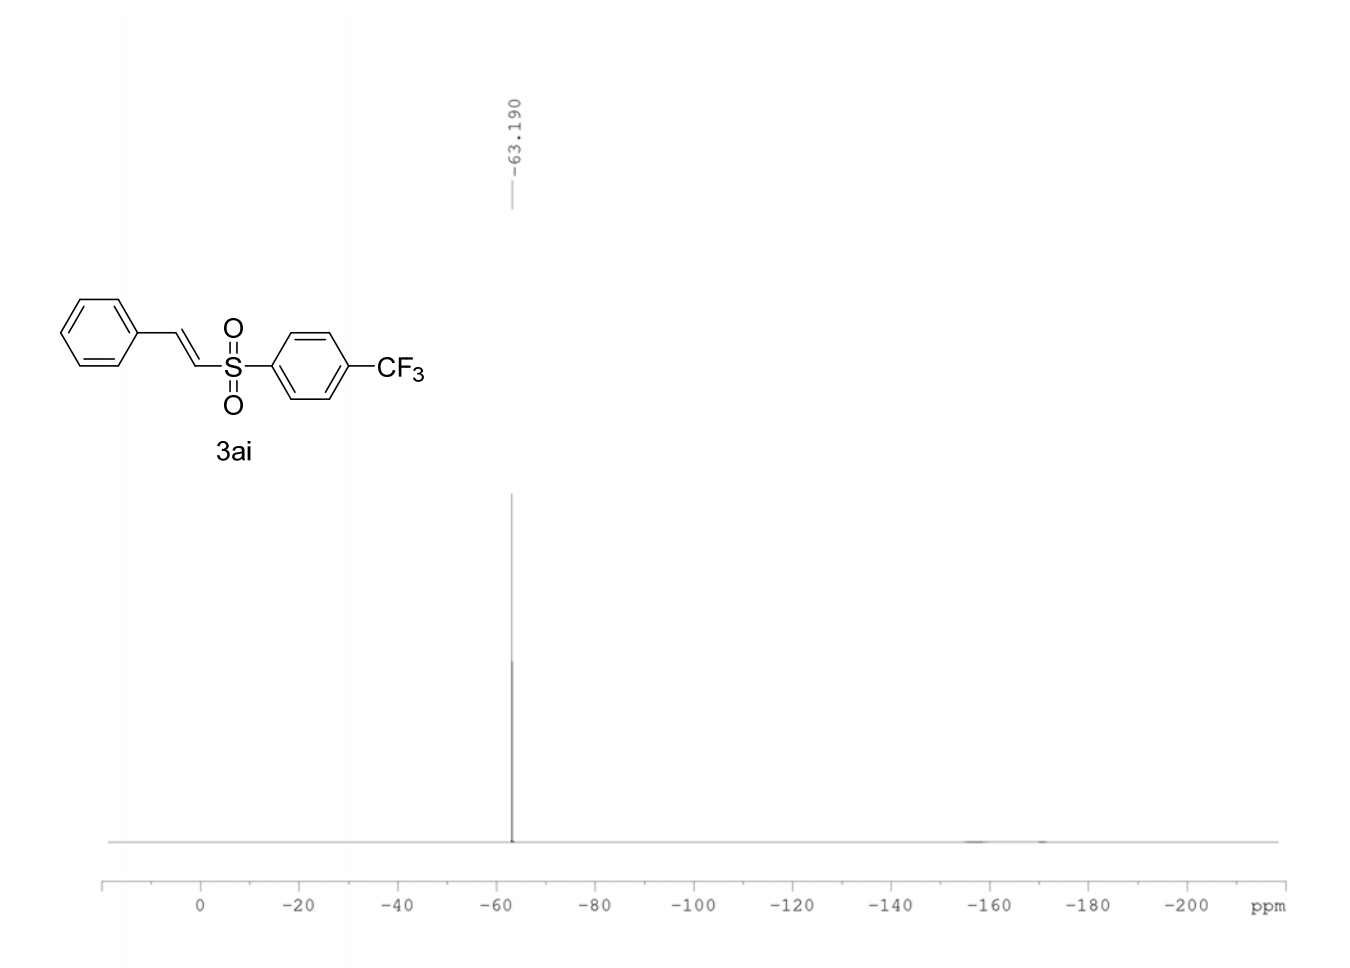

**<sup>19</sup>F NMR spectrum of compound 3ai in CDCl<sub>3</sub> (565 MHz)**

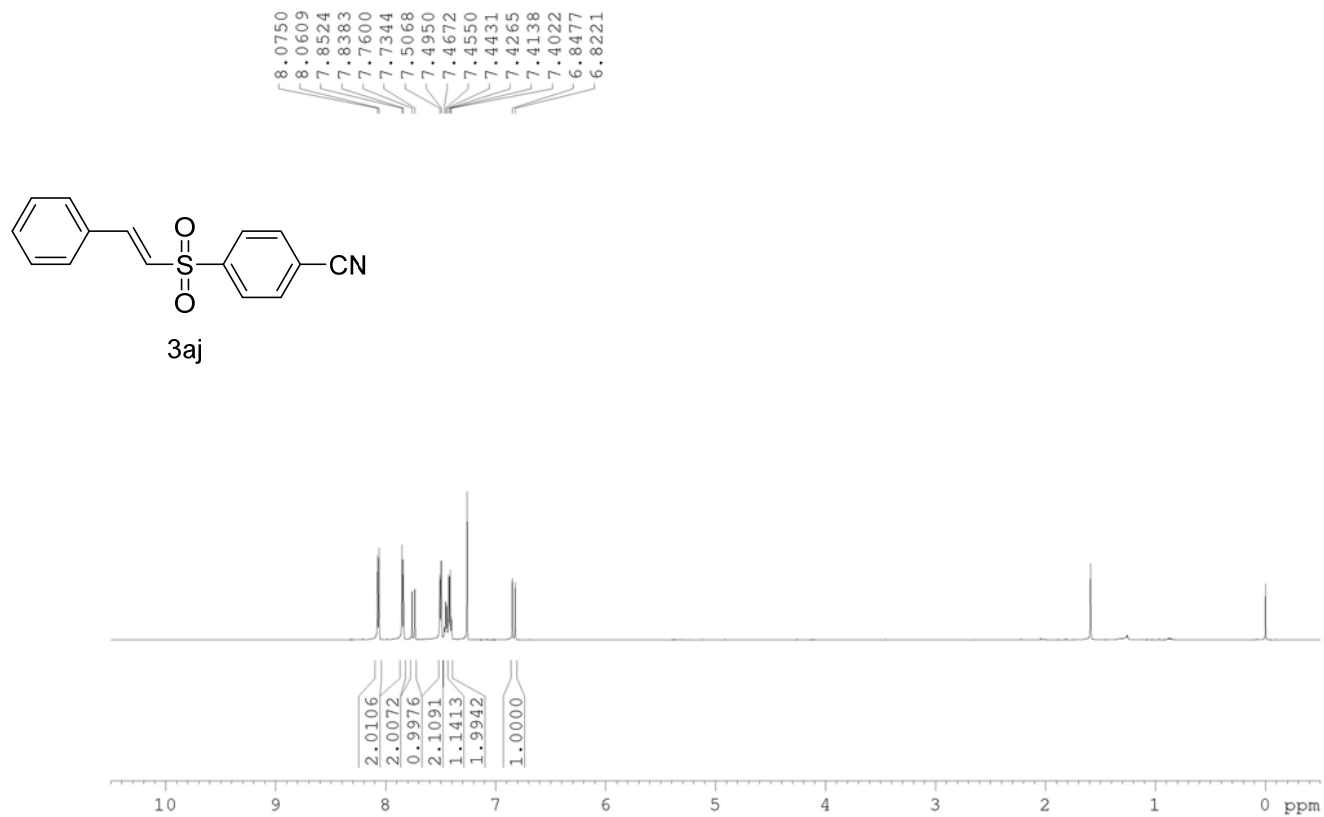

**<sup>1</sup>H NMR spectrum of compound 3aj in CDCl<sub>3</sub> (600 MHz)**

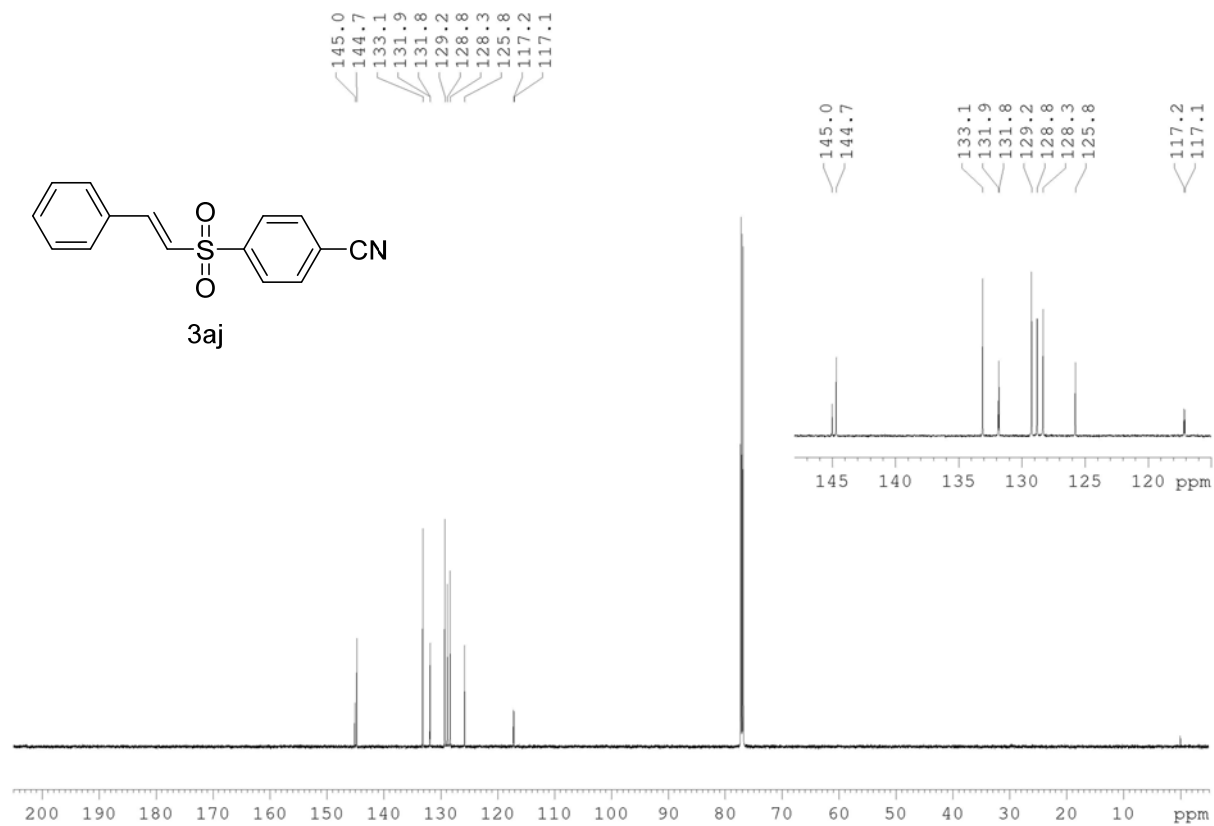

<sup>13</sup>C NMR spectrum of compound 3aj in CDCl<sub>3</sub> (150 MHz)

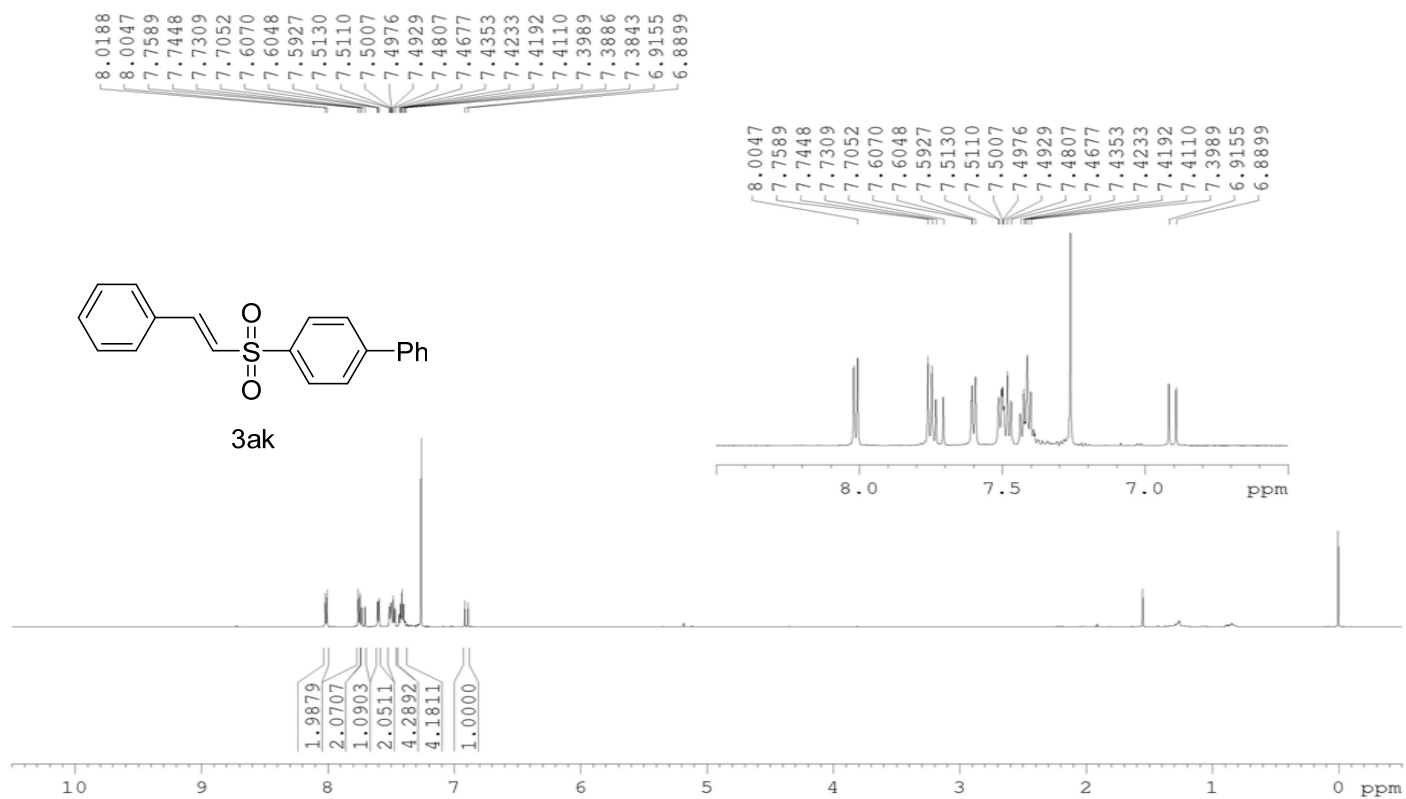

**<sup>1</sup>H NMR spectrum of compound 3ak in CDCl<sub>3</sub> (600 MHz)**



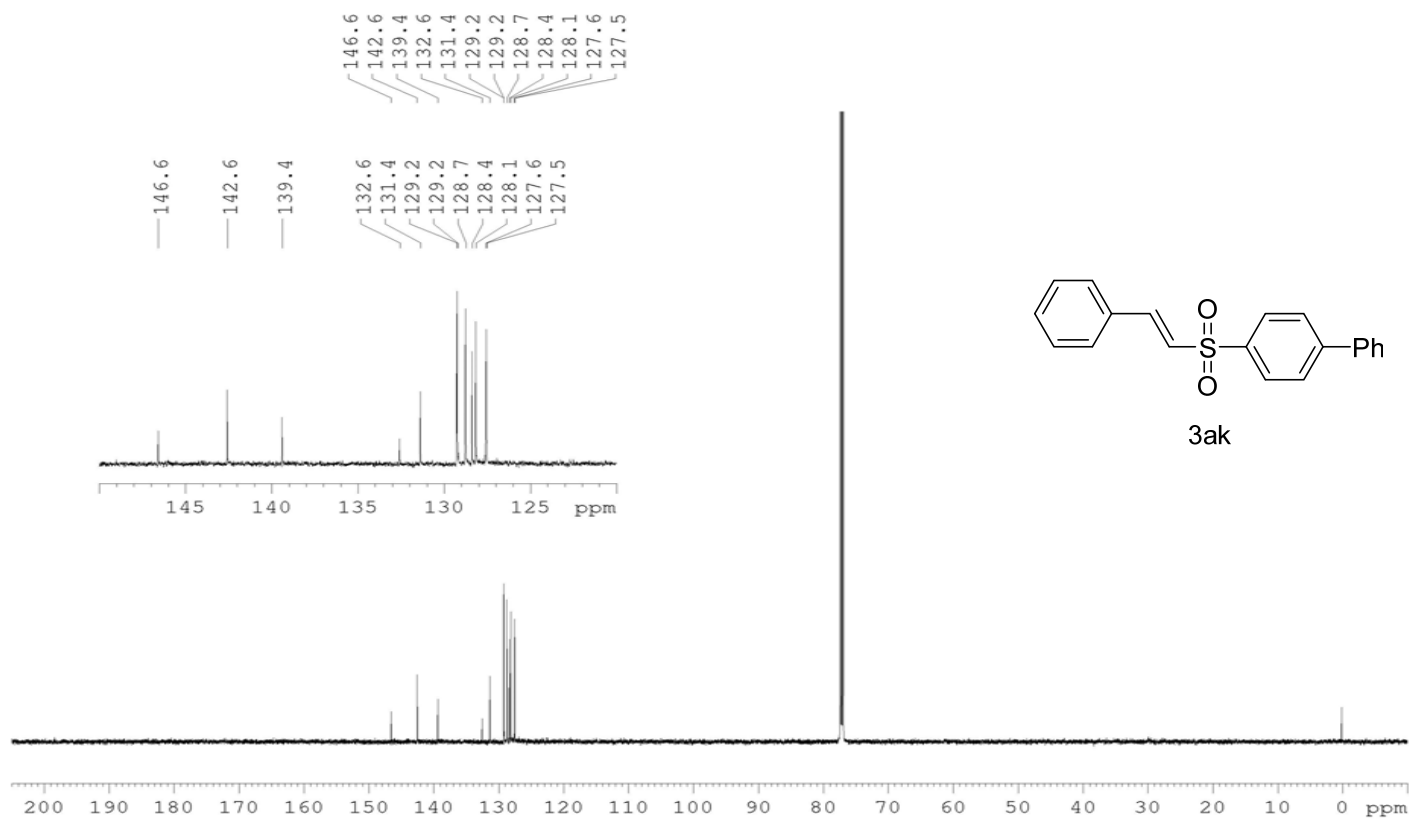

<sup>13</sup>C NMR spectrum of compound 3ak in CDCl<sub>3</sub> (150 MHz)

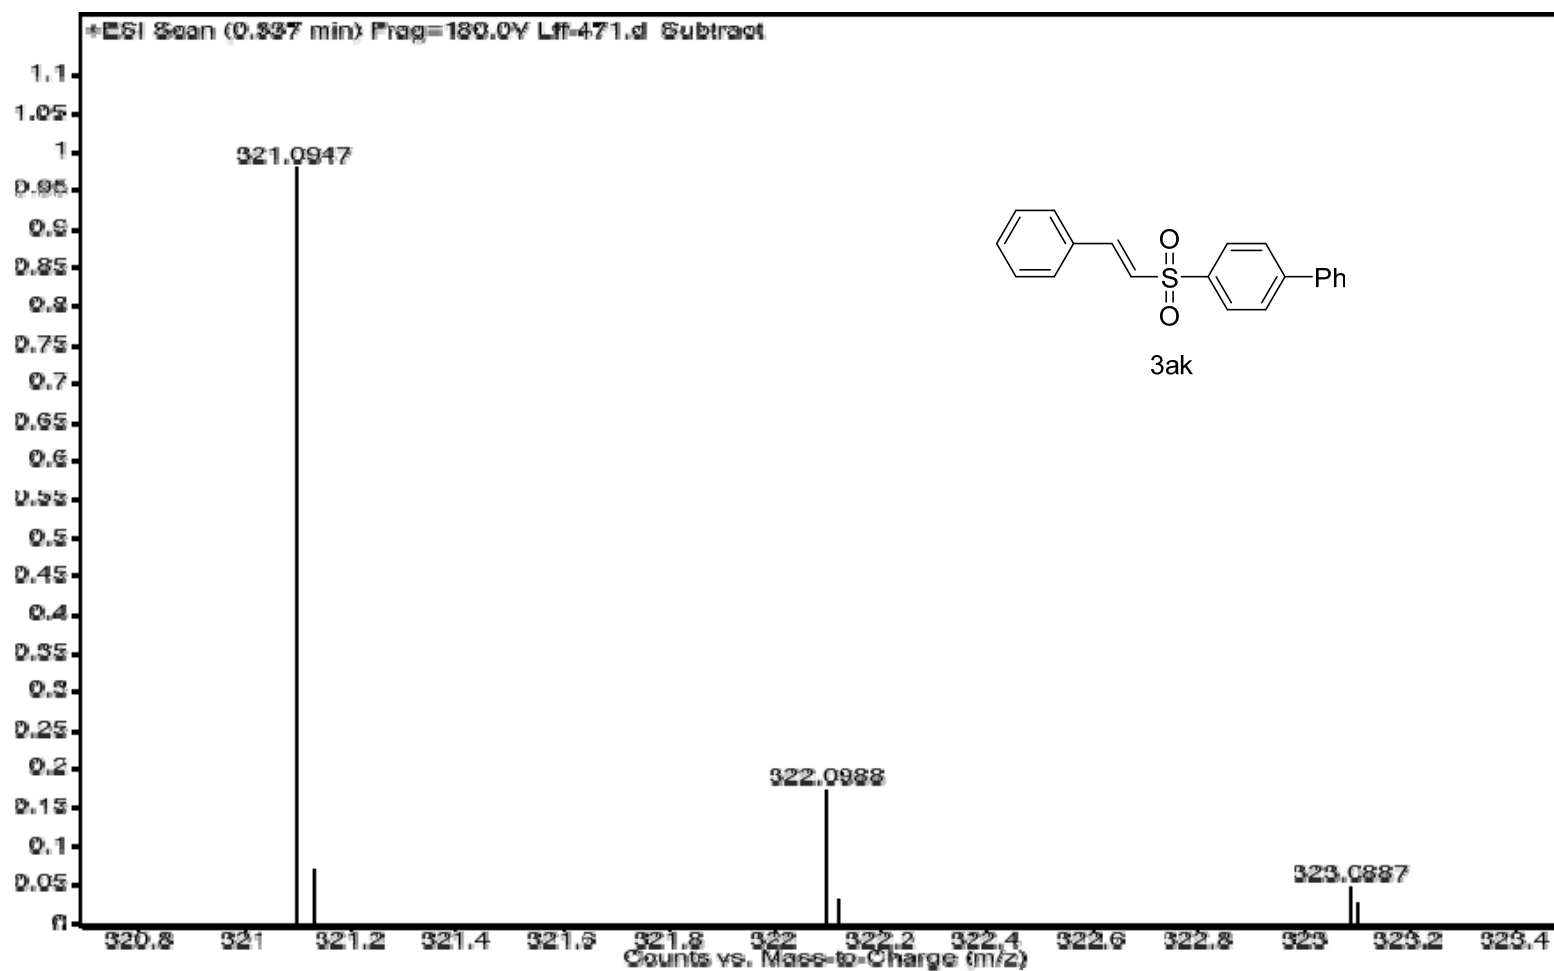

HRMS spectrum of compound 3ak

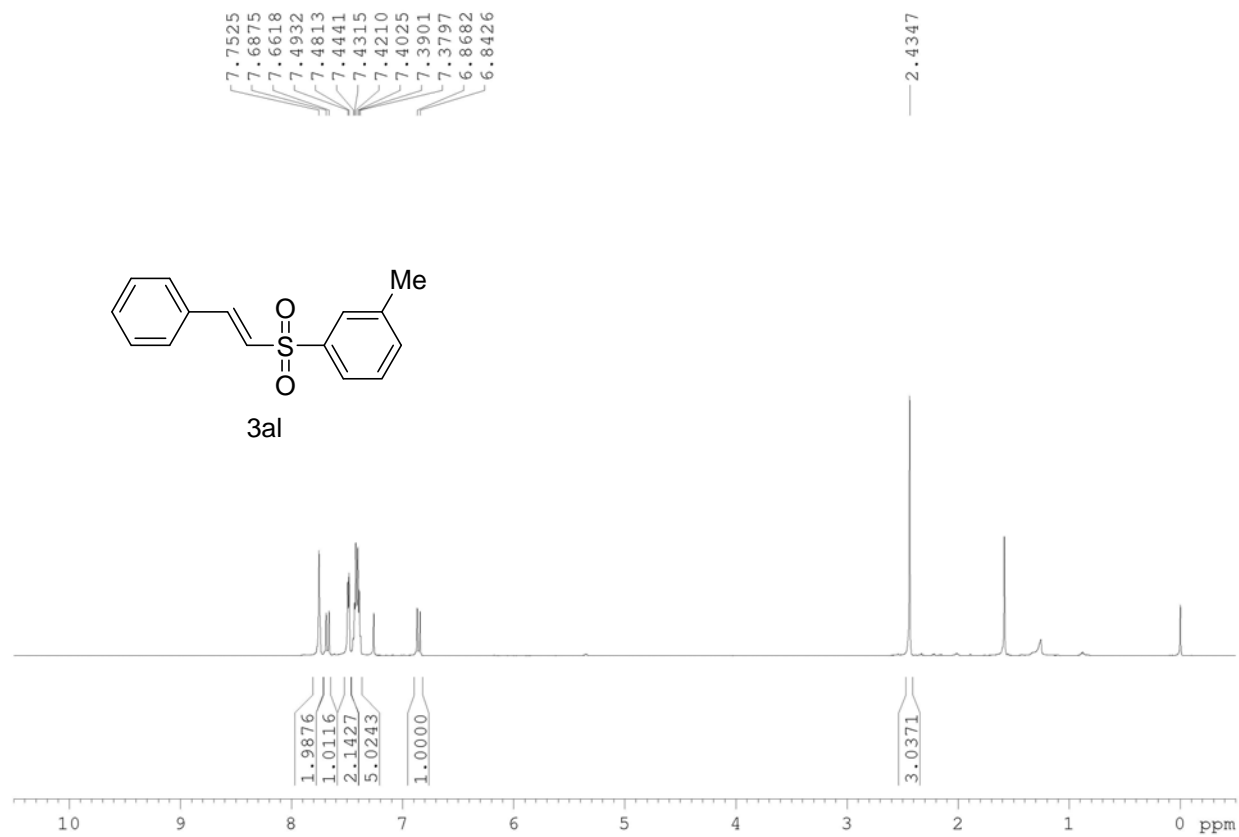

**<sup>1</sup>H NMR spectrum of compound 3al in CDCl<sub>3</sub> (600 MHz)**

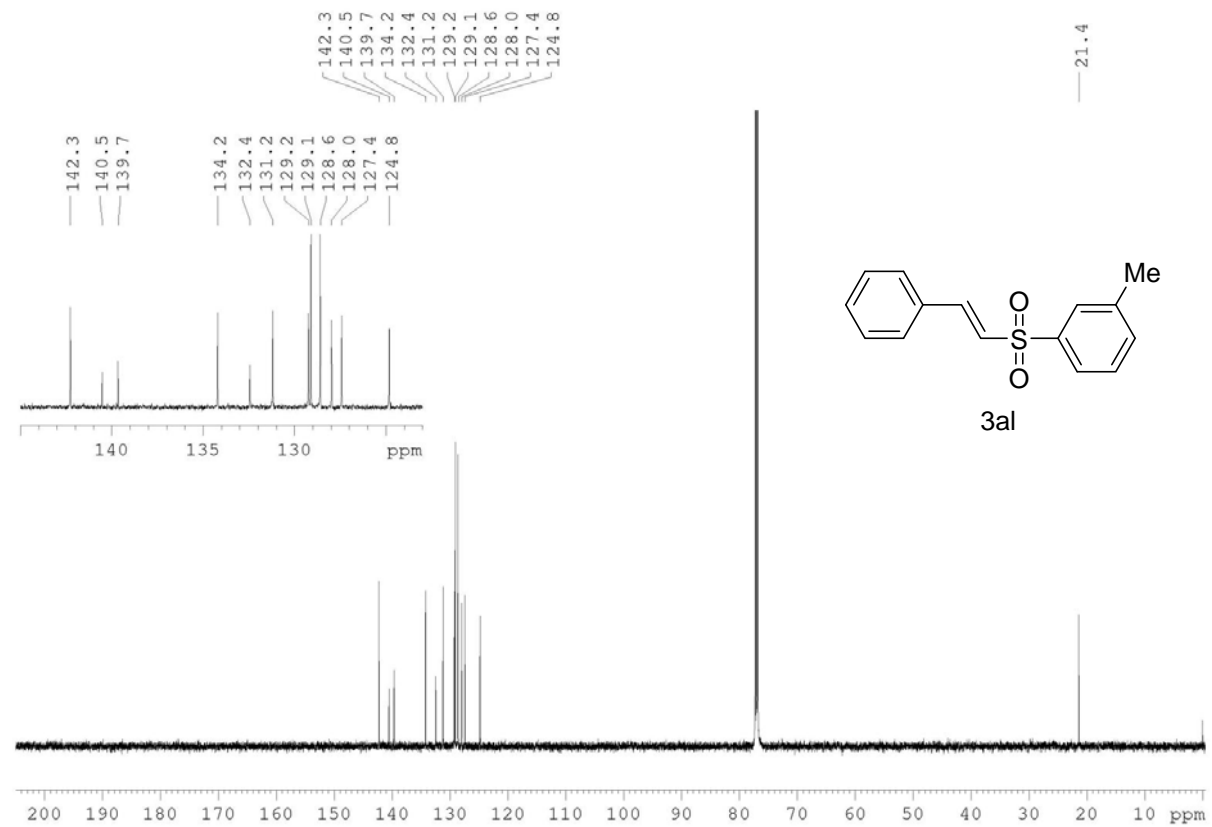

$^{13}\text{C}$  NMR spectrum of compound 3al in  $\text{CDCl}_3$  (150 MHz)

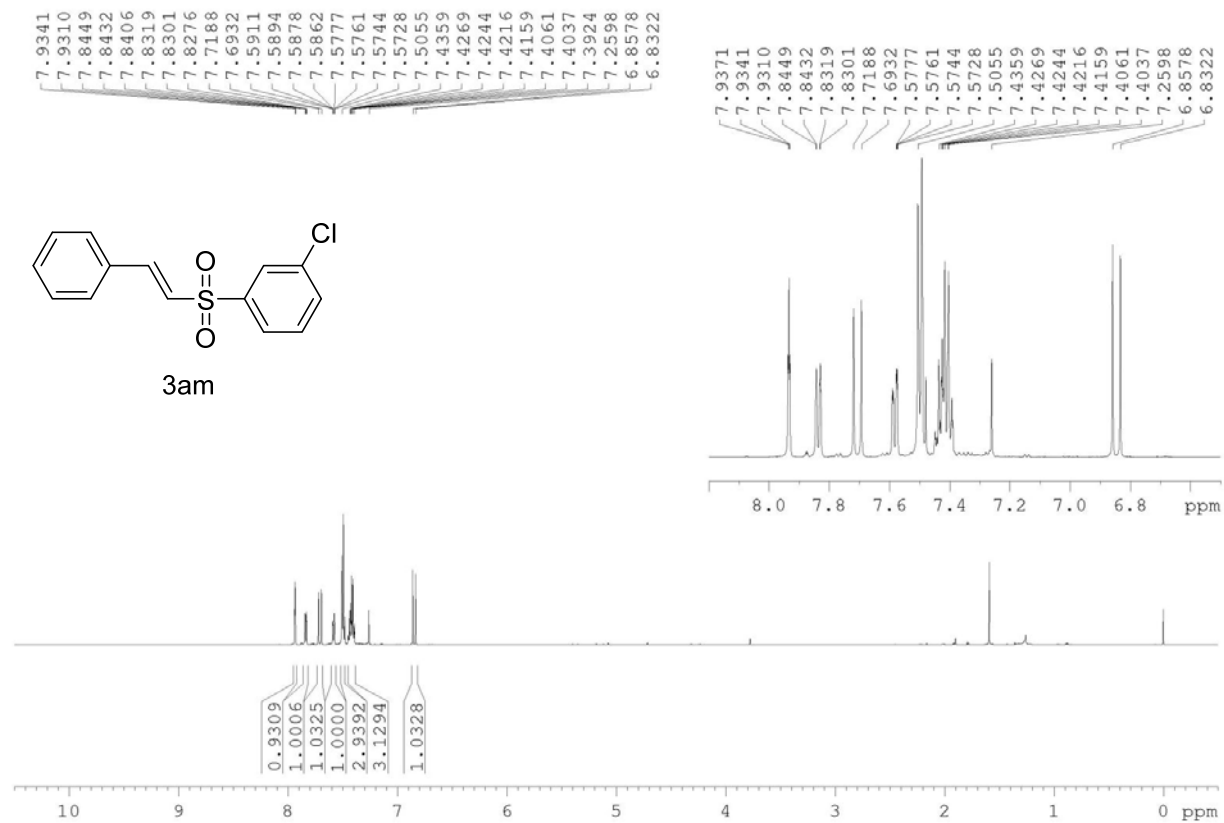

<sup>1</sup>H NMR spectrum of compound 3am in CDCl<sub>3</sub> (600 MHz)

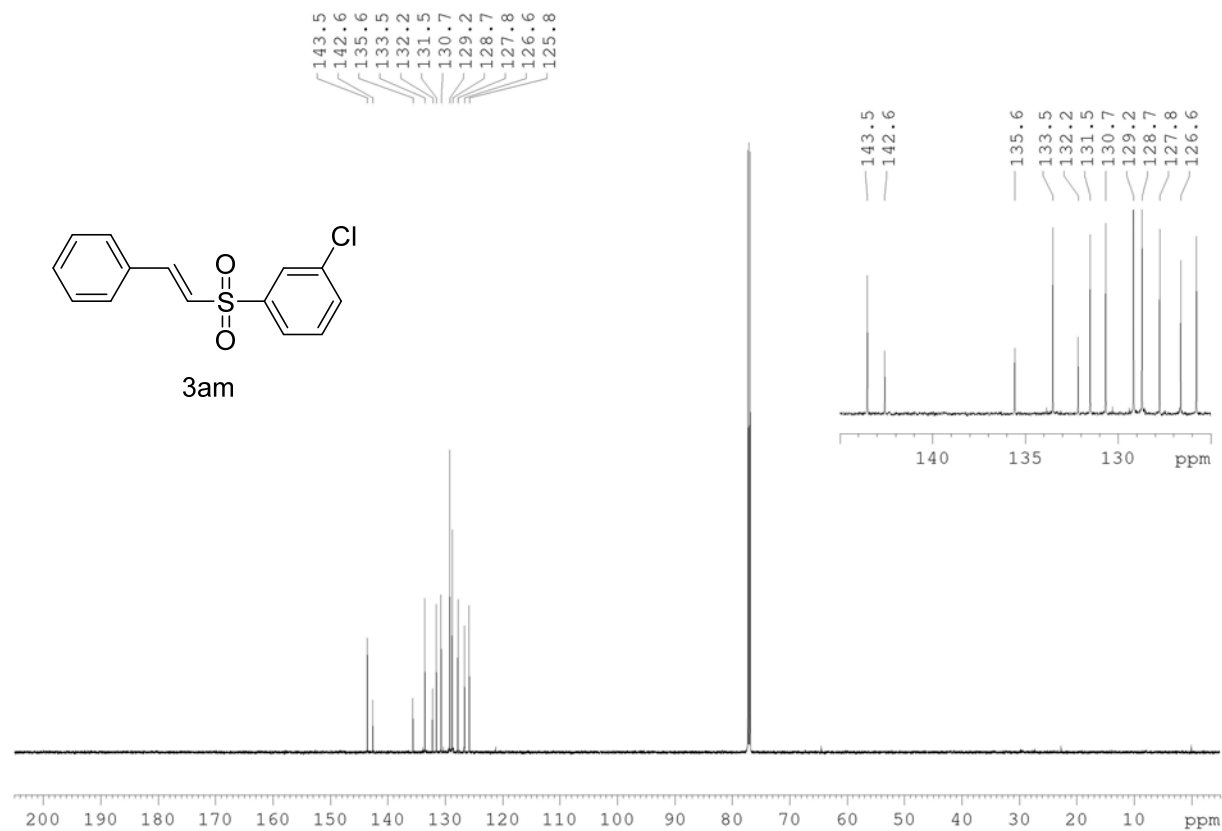

**<sup>13</sup>C NMR spectrum of compound 3am in CDCl<sub>3</sub> (150 MHz)**

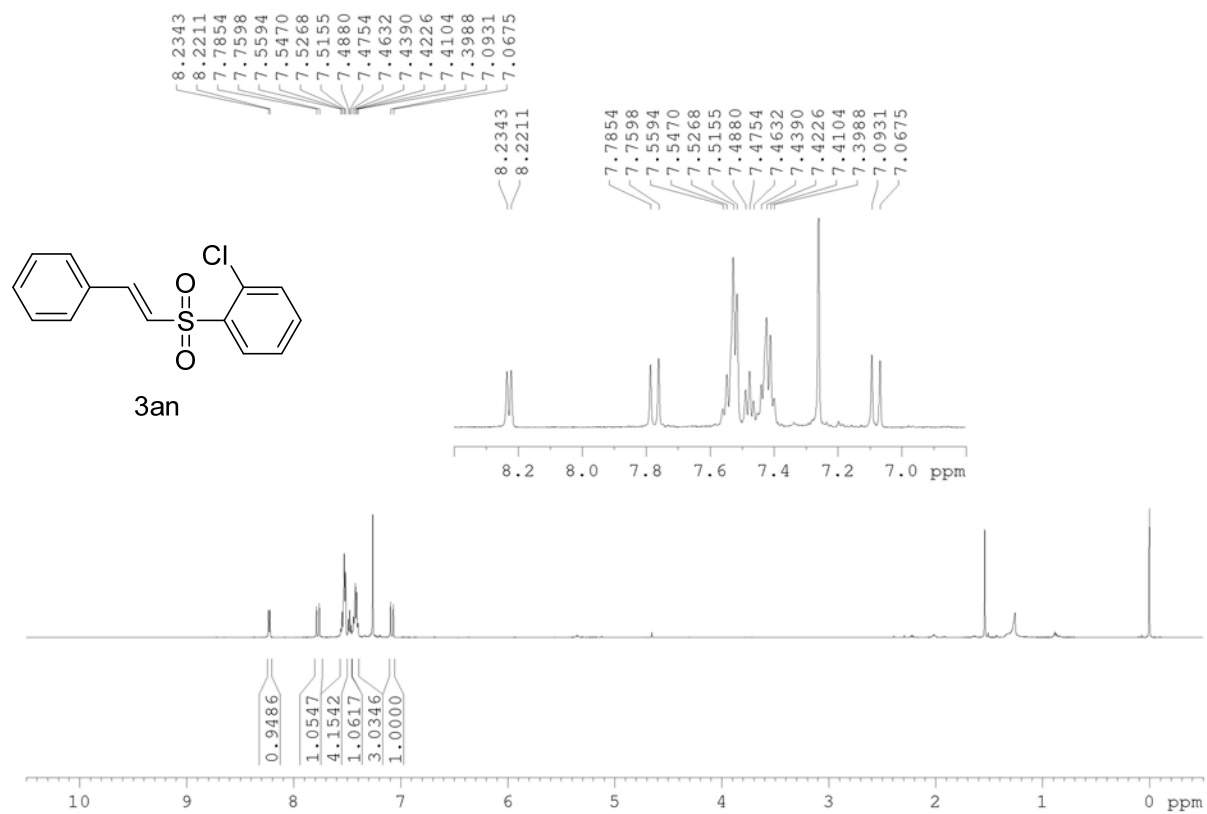

**<sup>1</sup>H NMR spectrum of compound 3an in CDCl<sub>3</sub> (600 MHz)**

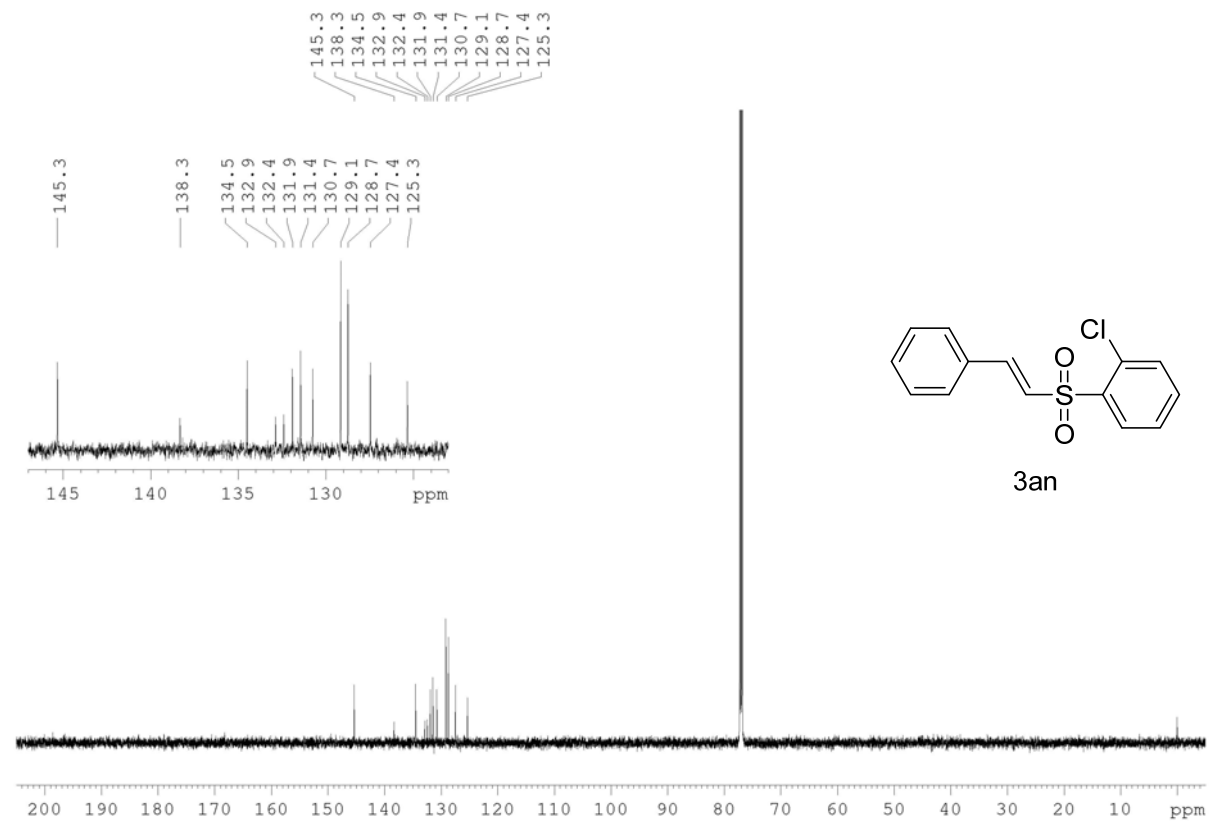

**<sup>13</sup>C NMR spectrum of compound 3an in CDCl<sub>3</sub> (150 MHz)**



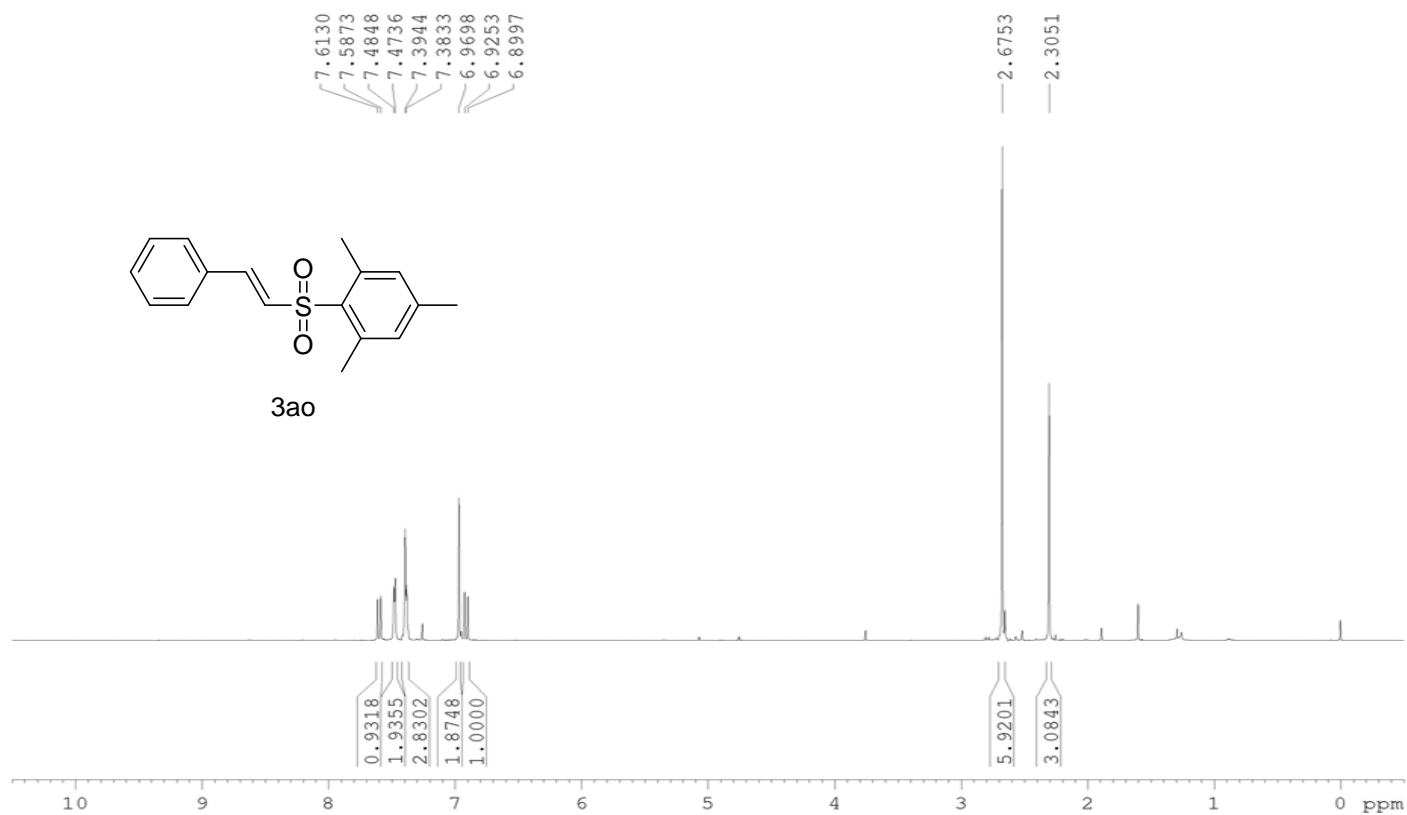

**<sup>1</sup>H NMR spectrum of compound 3ao in CDCl<sub>3</sub> (600 MHz)**

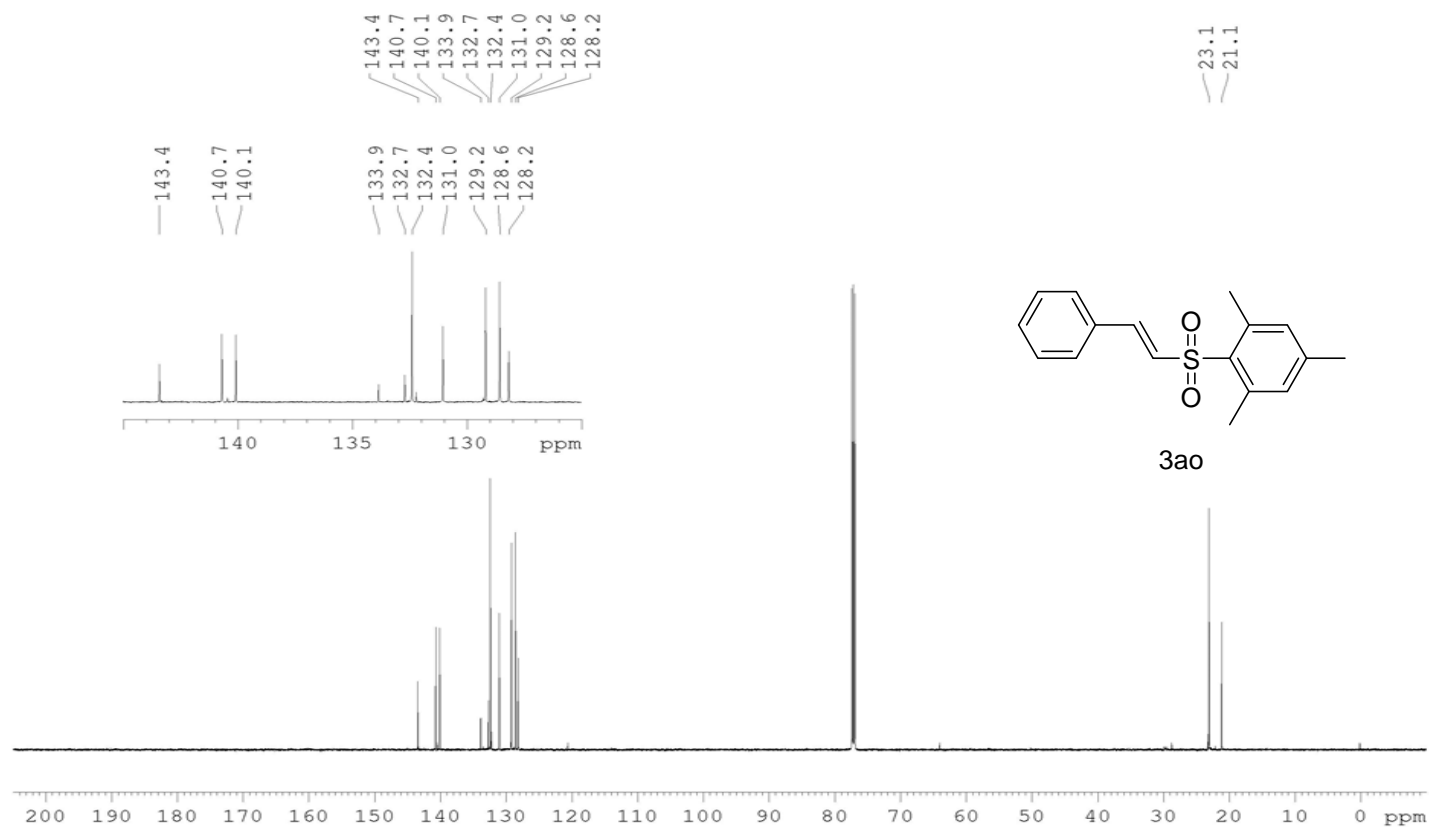

$^{13}\text{C}$  NMR spectrum of compound 3ao in  $\text{CDCl}_3$  (150 MHz)

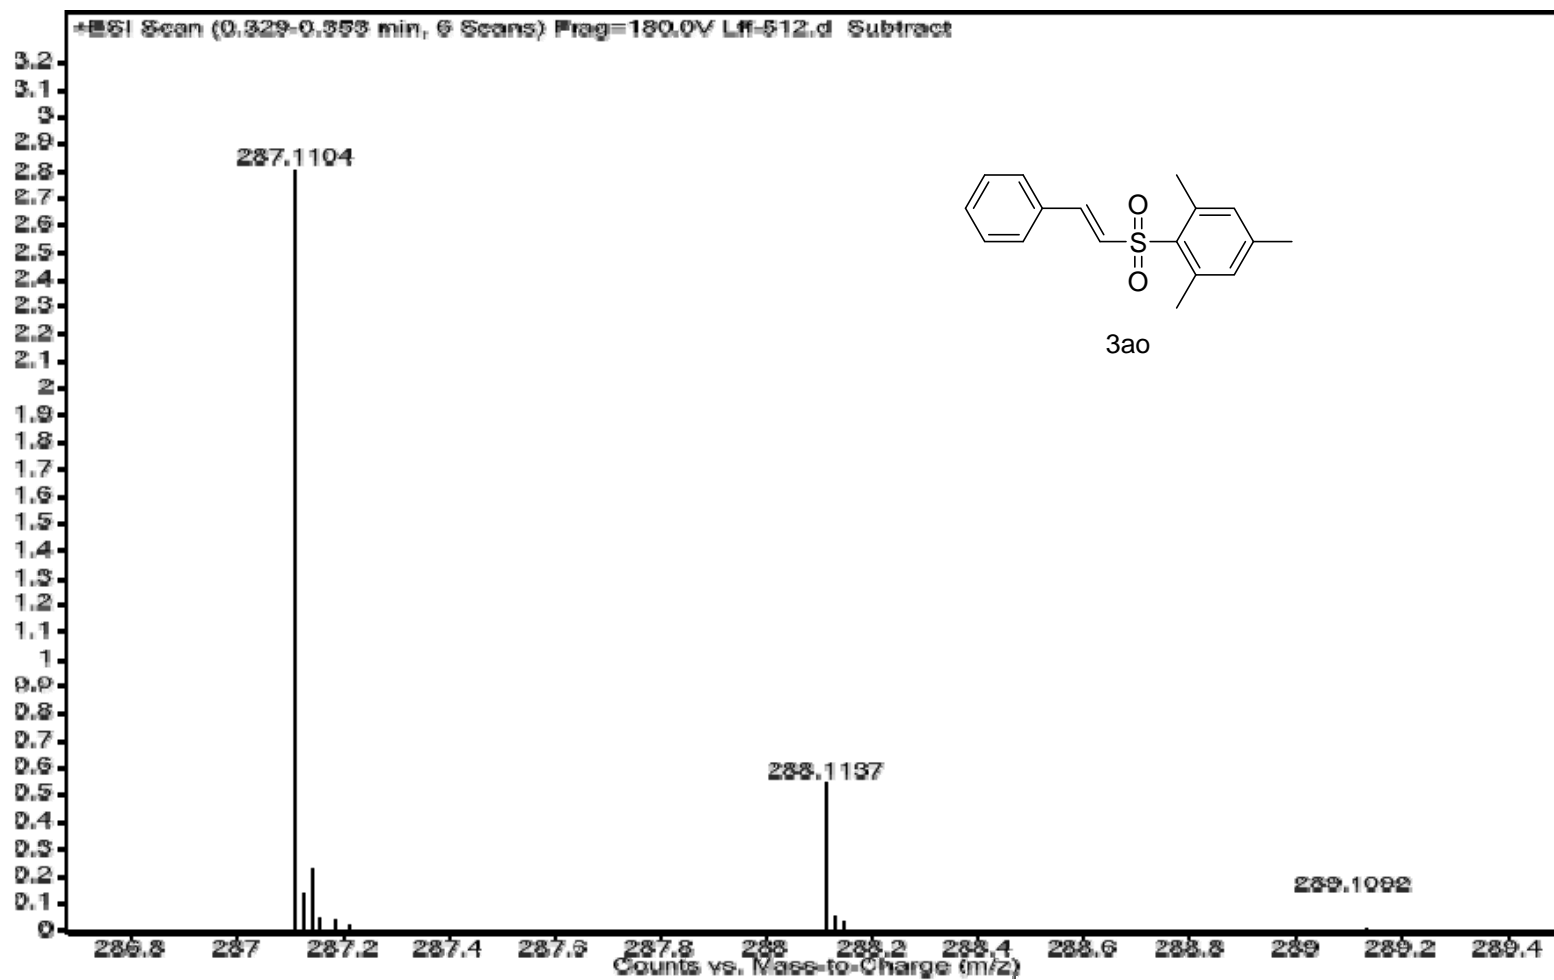

HRMS spectrum of compound 3ao

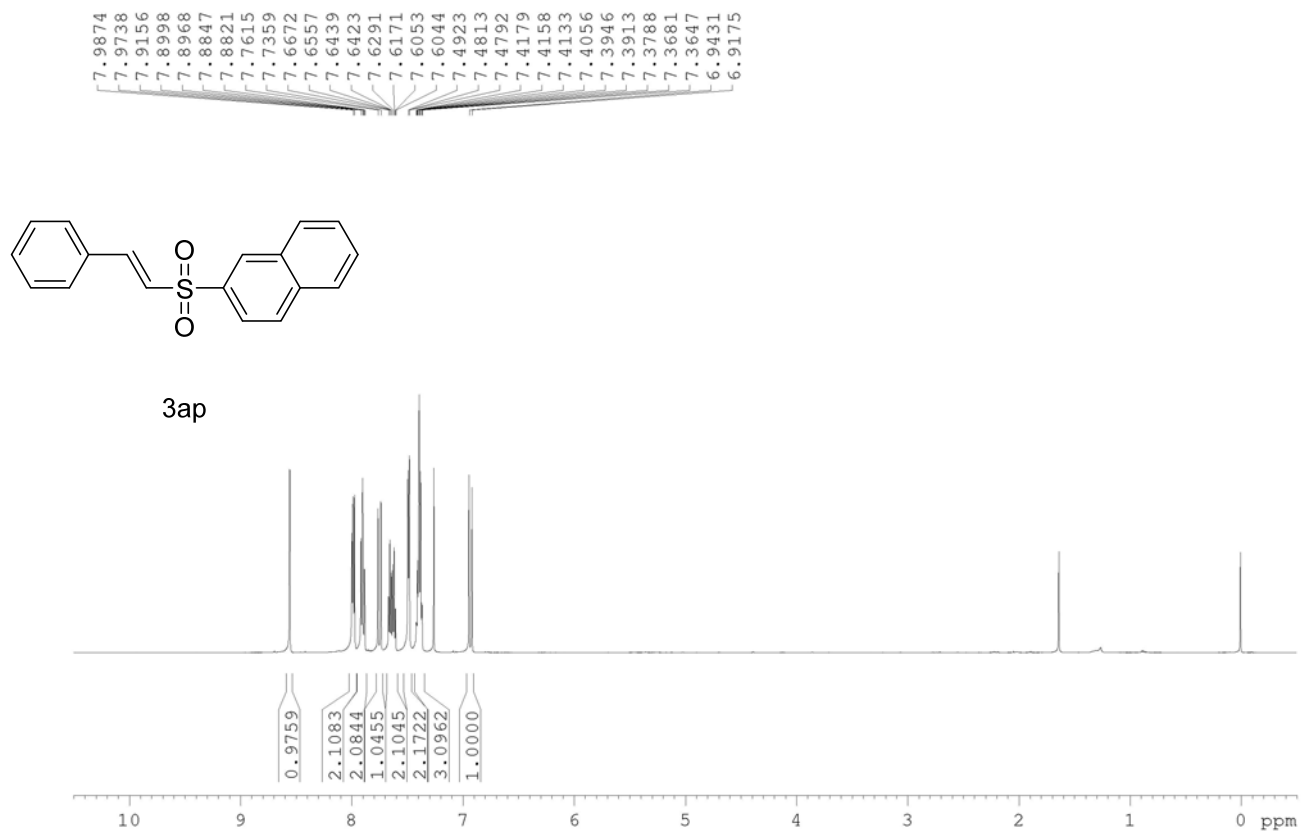

**<sup>1</sup>H NMR spectrum of compound 3ap in CDCl<sub>3</sub> (600 MHz)**

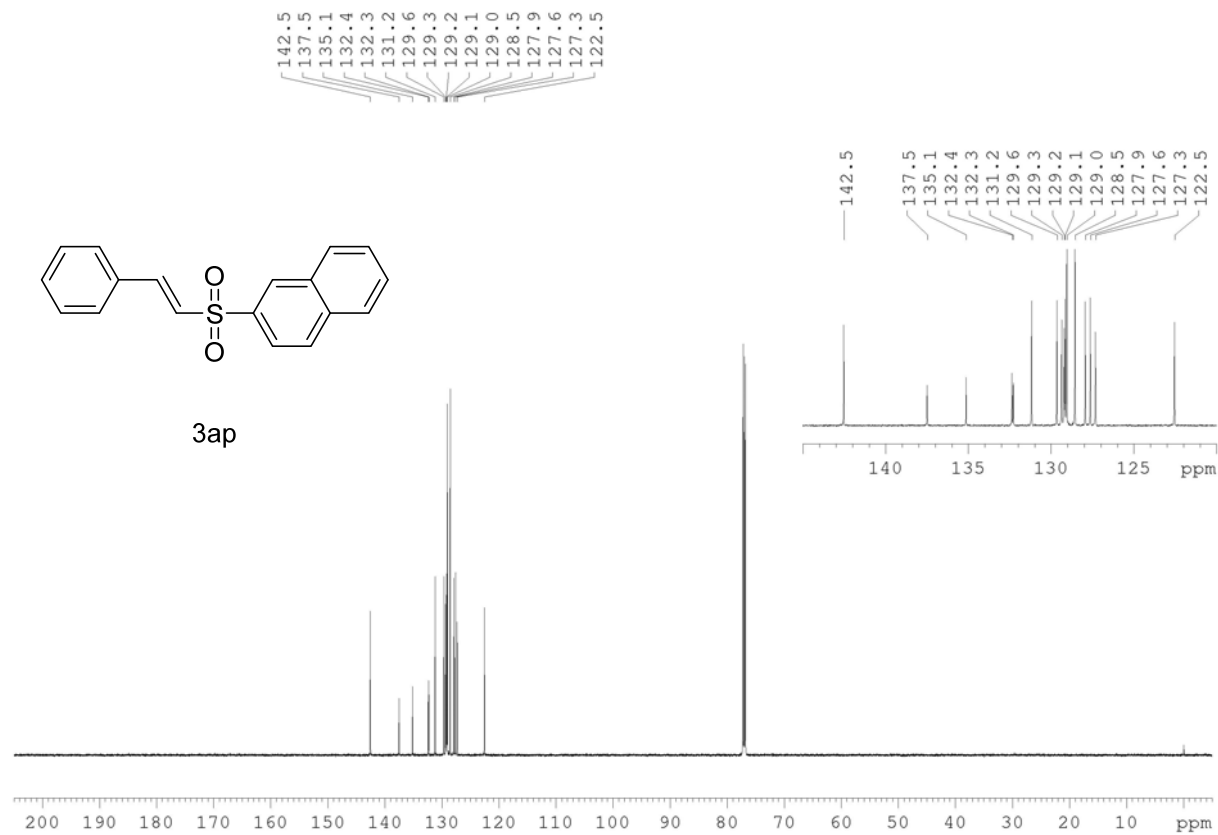

**<sup>13</sup>C NMR spectrum of compound 3ap in CDCl<sub>3</sub> (150 MHz)**

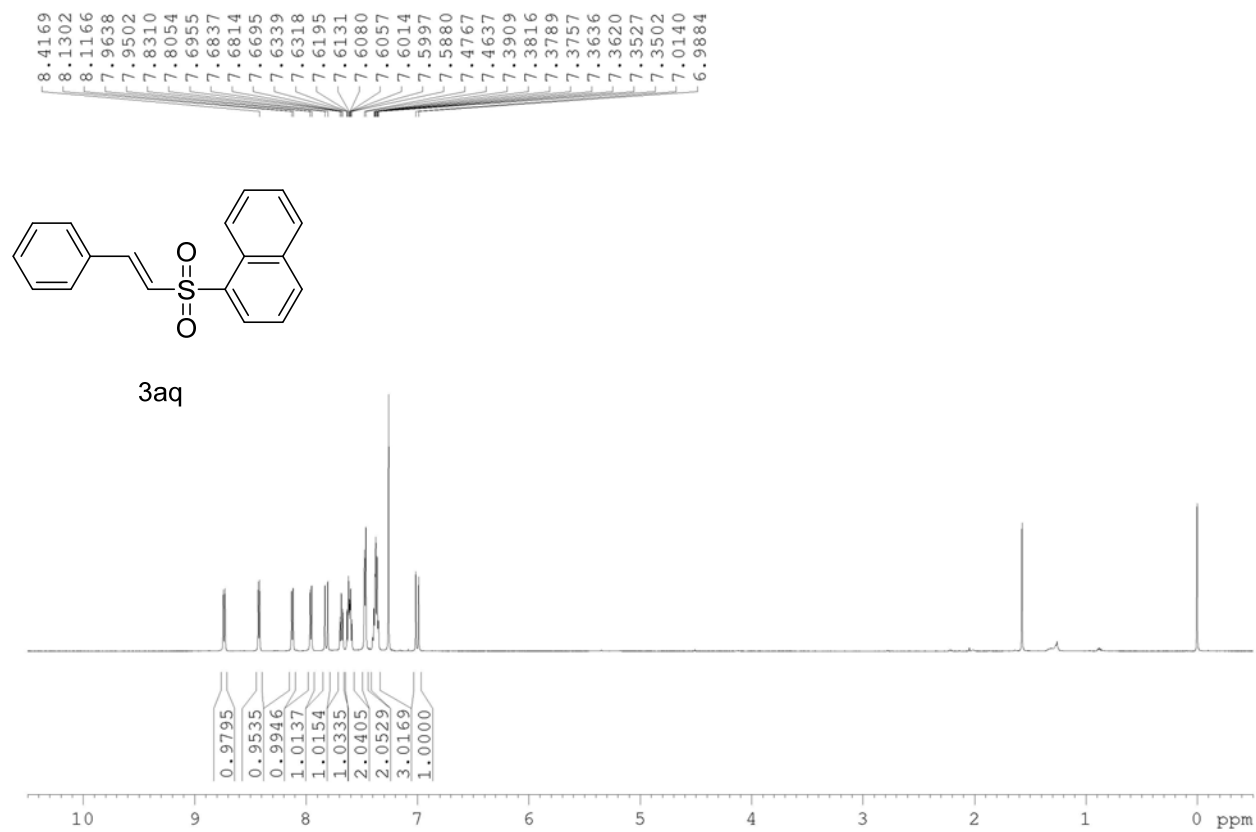

<sup>1</sup>H NMR spectrum of compound 3aq in CDCl<sub>3</sub> (600 MHz)

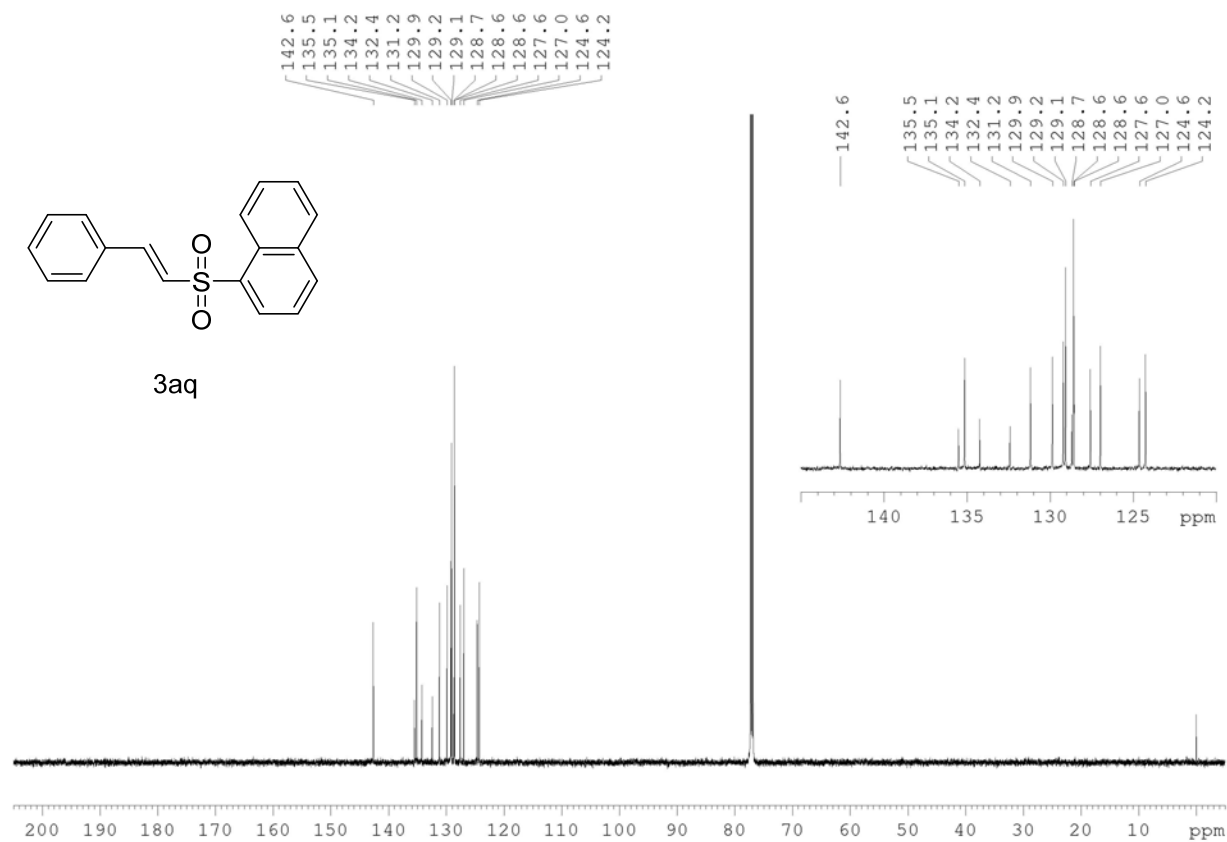

$^{13}\text{C}$  NMR spectrum of compound 3aq in  $\text{CDCl}_3$  (150 MHz)

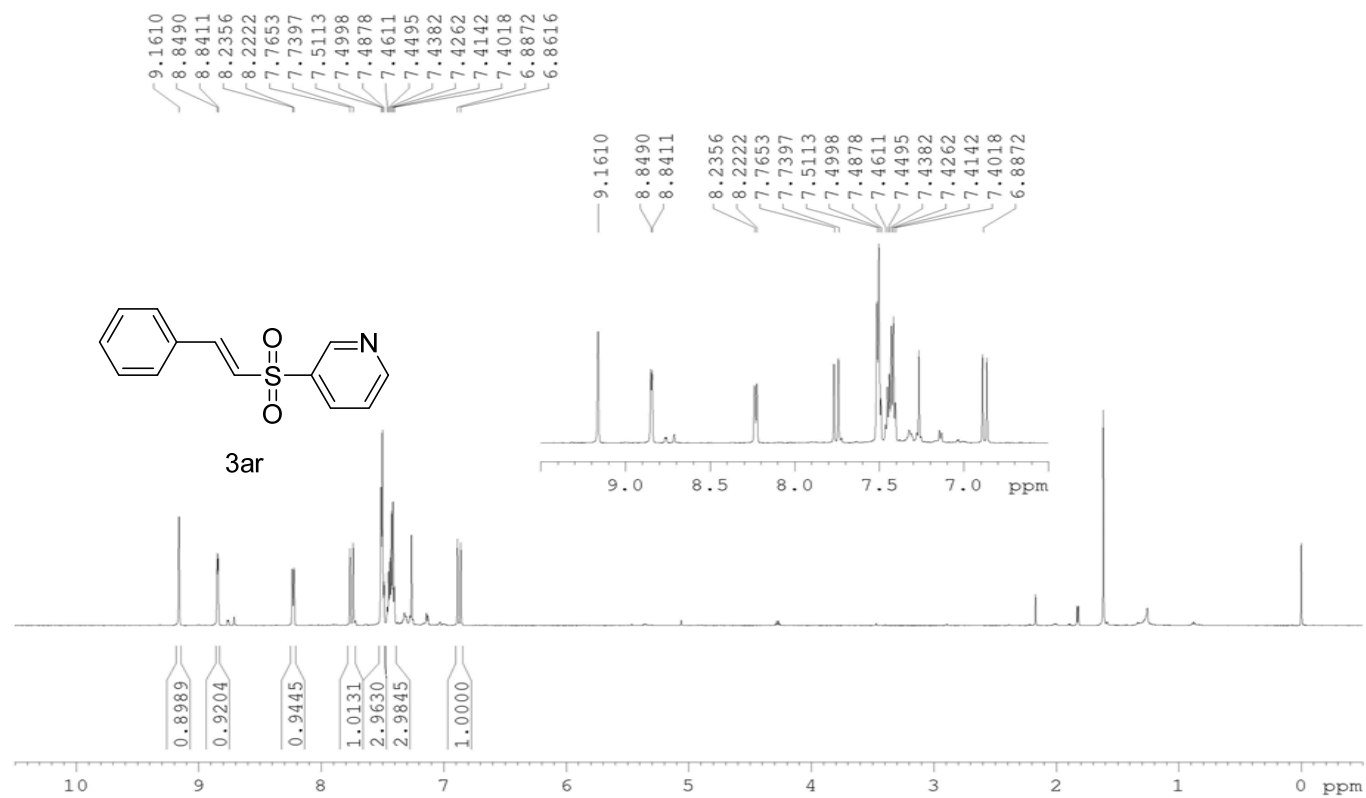

**<sup>1</sup>H NMR spectrum of compound 3ar in CDCl<sub>3</sub> (600 MHz)**



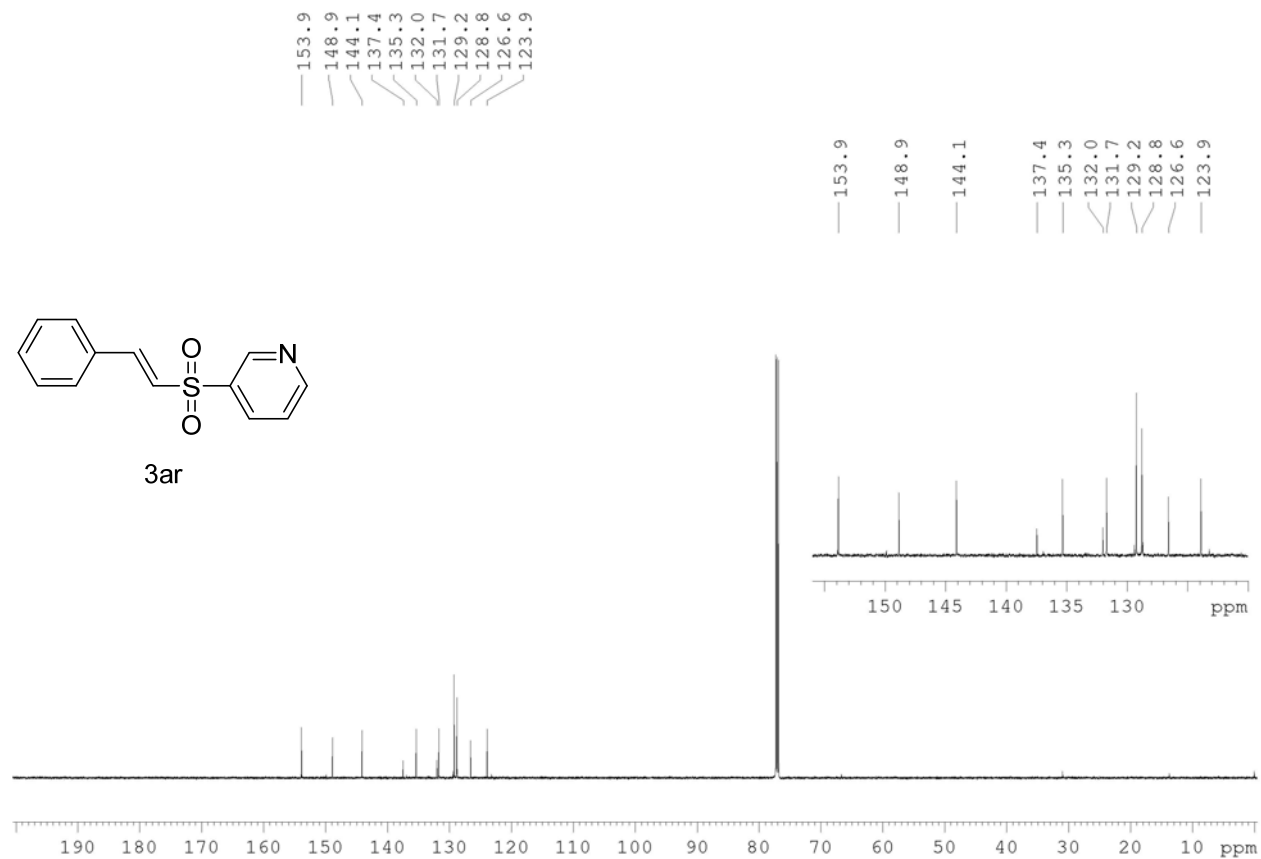

**$^{13}\text{C}$  NMR spectrum of compound 3ar in  $\text{CDCl}_3$  (150 MHz)**

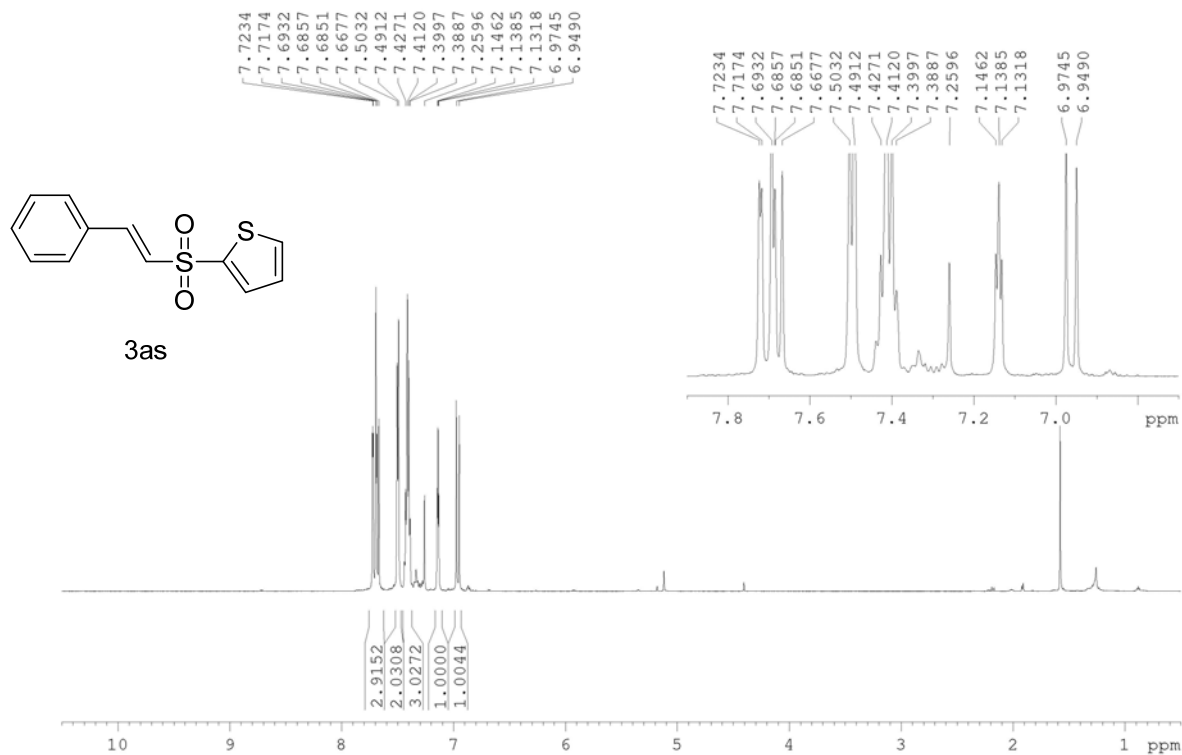

<sup>1</sup>H NMR spectrum of compound 3as in CDCl<sub>3</sub> (600 MHz)

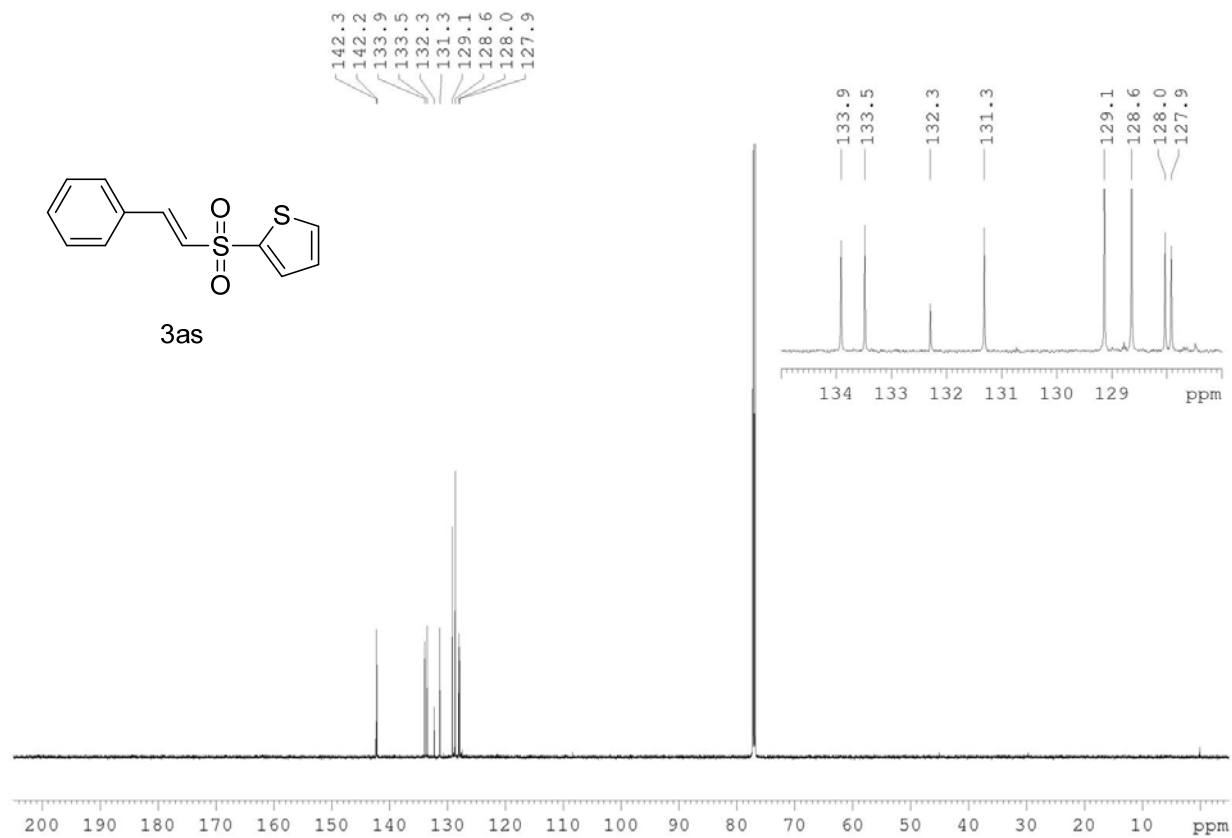

<sup>13</sup>C NMR spectrum of compound 3as in CDCl<sub>3</sub> (150 MHz)

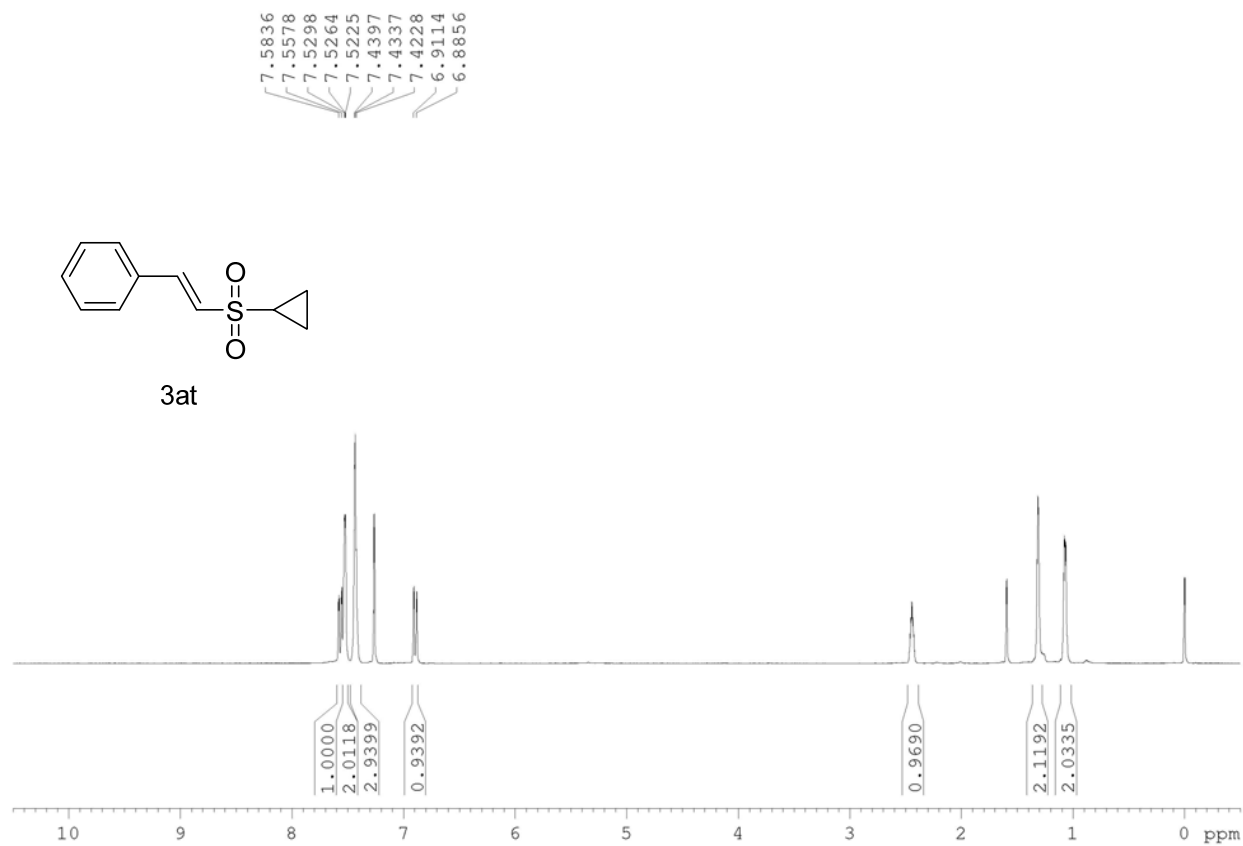

**<sup>1</sup>H NMR spectrum of compound 3at in CDCl<sub>3</sub> (600 MHz)**

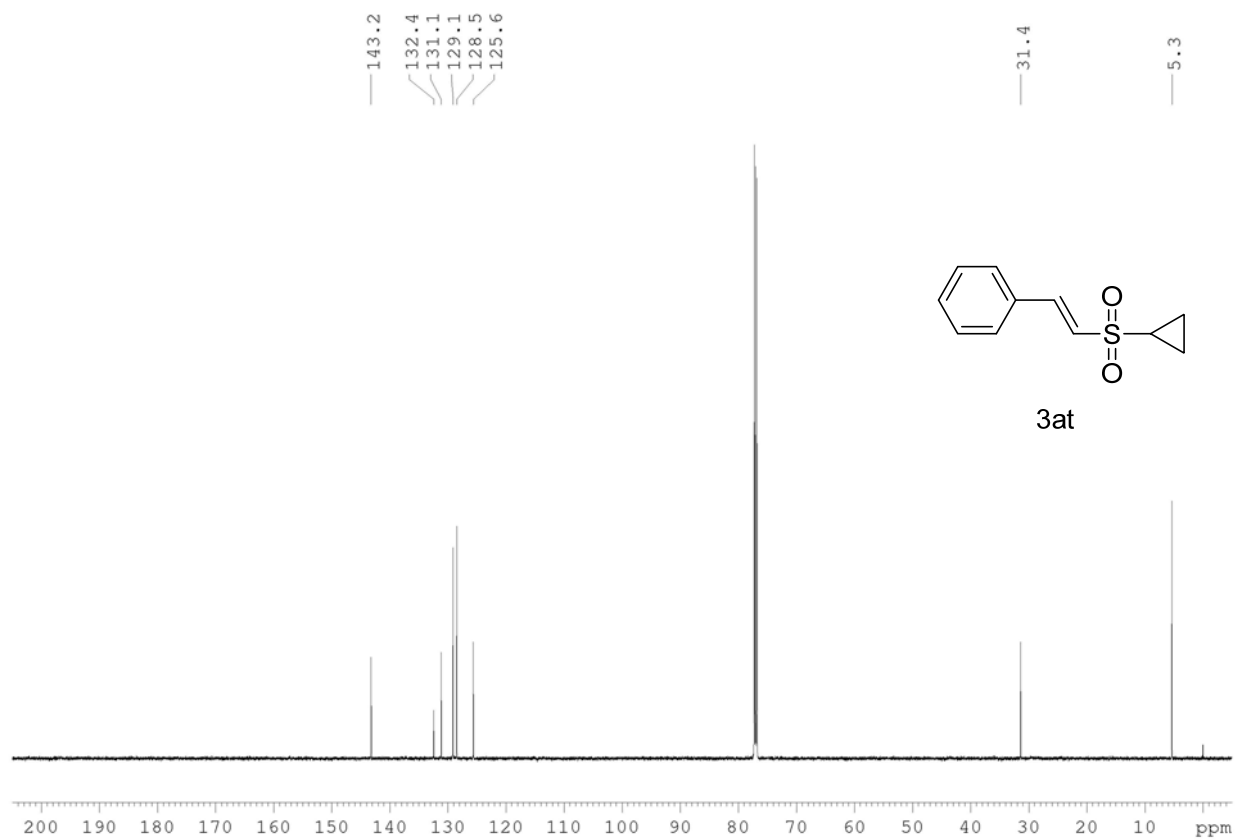

$^{13}\text{C}$  NMR spectrum of compound 3at in  $\text{CDCl}_3$  (150 MHz)

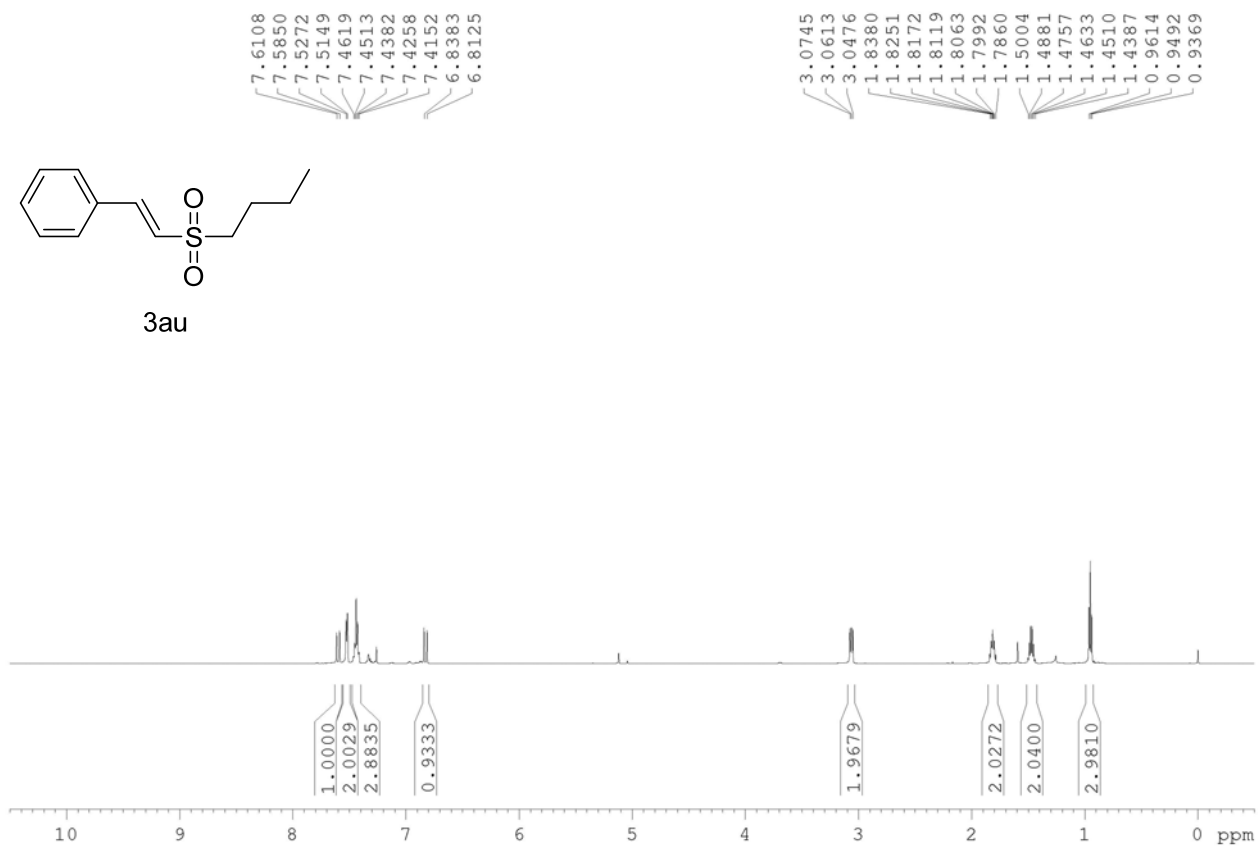

<sup>1</sup>H NMR spectrum of compound 3au in CDCl<sub>3</sub> (600 MHz)

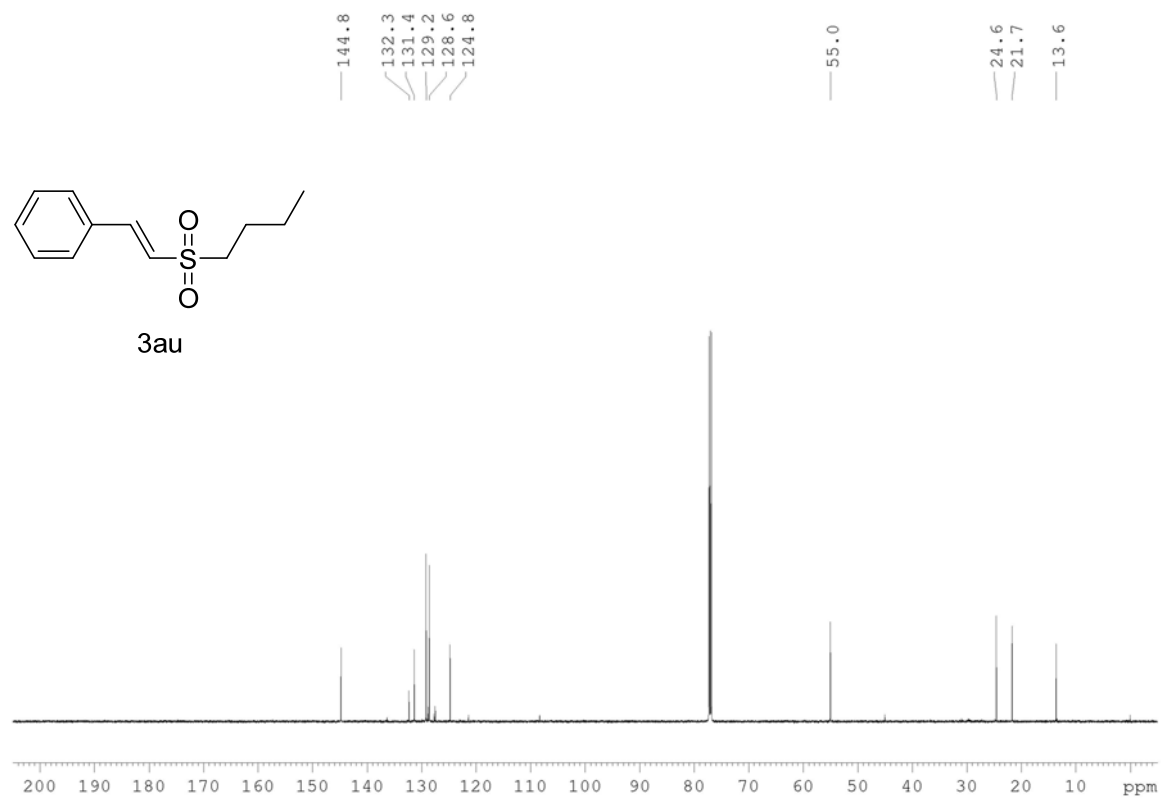

**$^{13}\text{C}$  NMR spectrum of compound 3au in  $\text{CDCl}_3$  (150 MHz)**

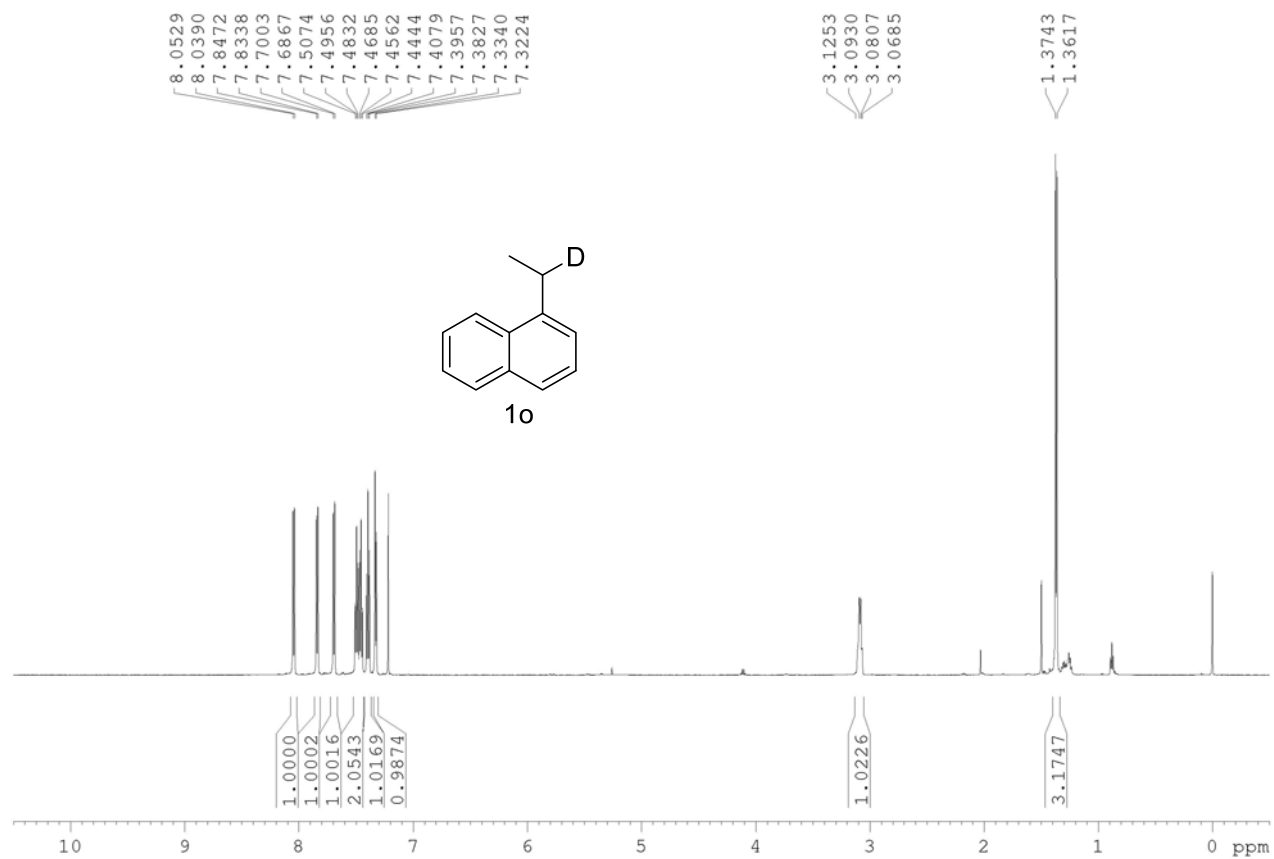

**<sup>1</sup>H NMR spectrum of compound 1o in CDCl<sub>3</sub> (600 MHz)**



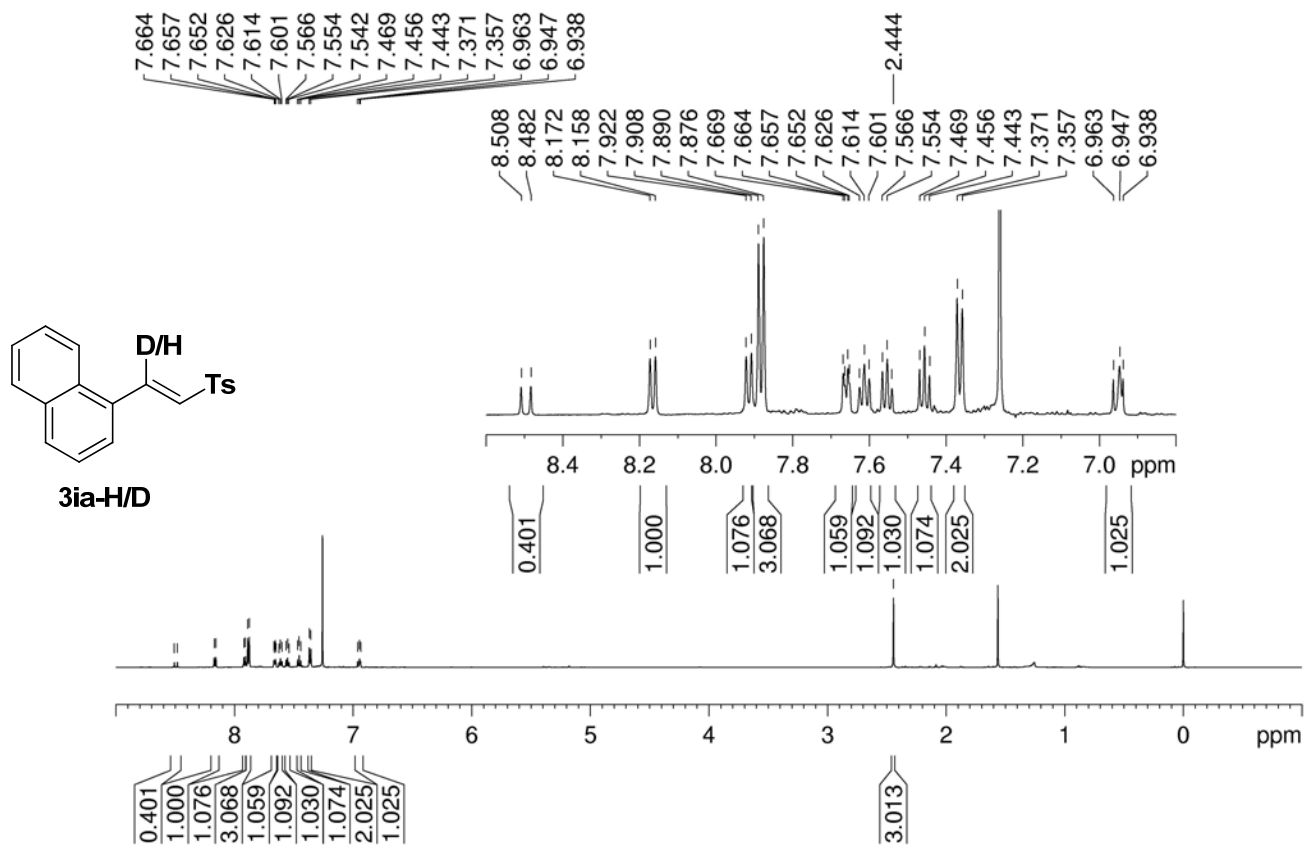

$^1\text{H}$  NMR spectrum of compound 3ia-H/D in  $\text{CDCl}_3$  (600 MHz)

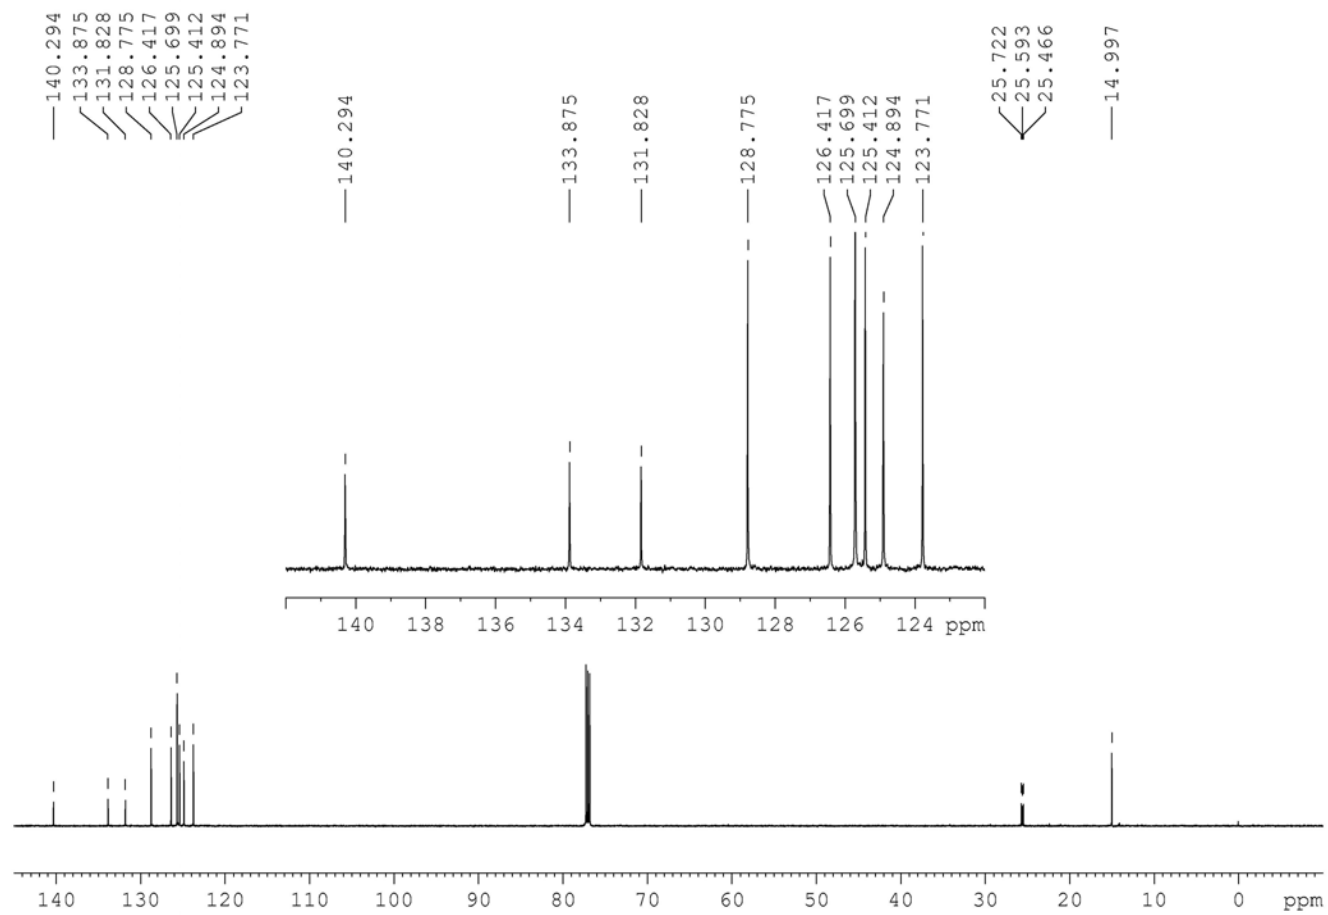

**$^{13}\text{C}$  NMR spectrum of compound 3ia-H/D in  $\text{CDCl}_3$  (150 MHz)**
